# Supplementary material for: Climate-human interaction associated with southeast Australian megafauna extinction patterns
Source: Nat Commun. 2019 Nov 22;10:5311. doi: 10.1038/s41467-019-13277-0 (PMC6876570; doi:10.1038/s41467-019-13277-0)
Supplement: Supplementary file 3 — Supplementary Data 1 [file 41467_2019_13277_MOESM3_ESM.xlsx]

## Sheet: Saltre(et al)_TableS1_R1
FosSahul_ID	Latitude	Longitude	Family	Genus	Species	AgeID	DatedRemain	DatedMaterial	Pretreatment_details	Pretreatment	ExtractionProblem	Contamination	Age (kyears)	AgeType	Precision (kyears)	PrecisionType	Age..calibrated. (years)	Sd..age.calibrated. (years)	DatingTechnique	UThClosedSystem	UThDetritalCorrection	ESRInternalDoseRate.10..	ESRGammaDoseRate	LuminescenceDatingMethod	LuminescenceBleachingStatus	LuminescenceModelling	LuminescenceResettingOSLSignal	Association	Association.sub.category	State	Year	Authors	Title	Journal	Volume	preQuality	Quality	Cave/Site/Deposit
598	-34.0667	115.017	Potoroidae	Borungaboodie	hatcheri	TEC-F	Sediment	Calcite					112	=	11	1S	112000	11000	U-series Th/U (ICP-MS)		yes							Indirect	yes	WA	2010	Prideaux GJ, GA Gully, AMC Couzens, LK Ayliffe, NR Jankowski, Z Jacobs, RG Roberts, J C Hellstrom, MK Gagan, and LM Hatcher	Timing and dynamics of Late Pleistocene mammal extinctions in southwestern Australia	Proceedings of the National Academy of Sciences of the USA	107(51):22157-22162	m	A	Tight Entrance Cave
599	-34.0667	115.017	Potoroidae	Borungaboodie	hatcheri	TE-FS-21a	Flowstone	Calcite					119.5	=	3.7	1S	119500	3700	U-series Th/U (TIMS)		yes							Indirect	yes	WA	2008	Ayliffe LK, GJ Prideaux, MI Bird, R Gr¬≥n, RG Roberts, GA Gully, R Jones, LK Fifield, RG Cresswell	Age constraints on Pleistocene megafauna at Tight Entrance Cave in southwestern Australia	Quaternary Science Reviews	27:1784-1788	m	A	Tight Entrance Cave
600	-34.0667	115.017	Potoroidae	Borungaboodie	hatcheri	TE-FS-UG	Flowstone	Calcite					136.8	=	2.6	1S	136800	2600	U-series Th/U (TIMS)		yes							Indirect	yes	WA	2008	Ayliffe LK, GJ Prideaux, MI Bird, R Gr¬≥n, RG Roberts, GA Gully, R Jones, LK Fifield, RG Cresswell	Age constraints on Pleistocene megafauna at Tight Entrance Cave in southwestern Australia	Quaternary Science Reviews	27:1784-1788	m	A	Tight Entrance Cave
602	-34.0667	115.017	Potoroidae	Borungaboodie	hatcheri	26	Sediment	Quartz					141	=	21	1S	141000	21000	OSL					single aliquot	well	yes	yes	Indirect	yes	WA	2001	Roberts RG, TF Flannery, LK Ayliffe, H Yoshida, JM Olley, GM Prideaux, GM Laslett, A Baynes, MA Smith, R Jones, BL Smith Hiroyuki Yoshida,1 Jon M. Olley,4 Gavin J. Prideaux,5 Geoff M. Laslett,6 Alexander Baynes,7 M. A. Smith,8 Rhys Jones,9 Barton L. Smit	New ages for the last Australian megafauna: continent-wide extinction about 46,000 years ago	Science	292:1888-1892	m	A	Tight Entrance Cave
754	-34.0667	115.02	Macropodidae	Congruus	kitcheneri	24	Sediment	Quartz					63	=	9	1S	63000	9000	OSL					single aliquot	well	yes	yes	Indirect	yes	WA	2001	Roberts RG, TF Flannery, LK Ayliffe, H Yoshida, JM Olley, GM Prideaux, GM Laslett, A Baynes, MA Smith, R Jones, BL Smith Hiroyuki Yoshida,1 Jon M. Olley,4 Gavin J. Prideaux,5 Geoff M. Laslett,6 Alexander Baynes,7 M. A. Smith,8 Rhys Jones,9 Barton L. Smit	New ages for the last Australian megafauna: continent-wide extinction about 46,000 years ago	Science	292:1888-1892	m	A	Mammoth Cave
755	-34.0667	115.02	Macropodidae	Congruus	kitcheneri	24	Sediment	Sediment					74	=	10	1S	74000	10000	OSL					single aliquot	well	yes	yes	Indirect	yes	WA	2001	Roberts RG, TF Flannery, LK Ayliffe, H Yoshida, JM Olley, GM Prideaux, GM Laslett, A Baynes, MA Smith, R Jones, BL Smith Hiroyuki Yoshida,1 Jon M. Olley,4 Gavin J. Prideaux,5 Geoff M. Laslett,6 Alexander Baynes,7 M. A. Smith,8 Rhys Jones,9 Barton L. Smit	New ages for the last Australian megafauna: continent-wide extinction about 46,000 years ago	Science	292:1888-1892	m	A	Mammoth Cave
756	-34.0667	115.017	Macropodidae	Congruus	kitcheneri	TEC-F	Sediment	Calcite					112	=	11	1S	112000	11000	U-series Th/U (ICP-MS)		yes							Indirect	yes	WA	2010	Prideaux GJ, GA Gully, AMC Couzens, LK Ayliffe, NR Jankowski, Z Jacobs, RG Roberts, J C Hellstrom, MK Gagan, and LM Hatcher	Timing and dynamics of Late Pleistocene mammal extinctions in southwestern Australia	Proceedings of the National Academy of Sciences of the USA	107(51):22157-22162	m	A	Tight Entrance Cave
757	-34.0667	115.017	Macropodidae	Congruus	kitcheneri	TE-FS-21a	Flowstone	Calcite					119.5	=	3.7	1S	119500	3700	U-series Th/U (TIMS)		yes							Indirect	yes	WA	2008	Ayliffe LK, GJ Prideaux, MI Bird, R Gr¬≥n, RG Roberts, GA Gully, R Jones, LK Fifield, RG Cresswell	Age constraints on Pleistocene megafauna at Tight Entrance Cave in southwestern Australia	Quaternary Science Reviews	27:1784-1788	m	A	Tight Entrance Cave
758	-34.0667	115.017	Macropodidae	Congruus	kitcheneri	TE-FS-UG	Flowstone	Calcite					136.8	=	2.6	1S	136800	2600	U-series Th/U (TIMS)		yes							Indirect	yes	WA	2008	Ayliffe LK, GJ Prideaux, MI Bird, R Gr¬≥n, RG Roberts, GA Gully, R Jones, LK Fifield, RG Cresswell	Age constraints on Pleistocene megafauna at Tight Entrance Cave in southwestern Australia	Quaternary Science Reviews	27:1784-1788	m	A	Tight Entrance Cave
1131	-27.9167	151.967	Diprotodontidae	Diprotodon	optatum	1	Sediment	Quartz					46	=	6	1S	46000	6000	OSL					single aliquot	well	yes	yes	Indirect	yes	QLD	2001	Roberts RG, TF Flannery, LK Ayliffe, H Yoshida, JM Olley, GM Prideaux, GM Laslett, A Baynes, MA Smith, R Jones, BL Smith Hiroyuki Yoshida,1 Jon M. Olley,4 Gavin J. Prideaux,5 Geoff M. Laslett,6 Alexander Baynes,7 M. A. Smith,8 Rhys Jones,9 Barton L. Smit	New ages for the last Australian megafauna: continent-wide extinction about 46,000 years ago	Science	292:1888-1892	m	A	Ned's Gully
1132	-27.9167	151.967	Diprotodontidae	Diprotodon	optatum	1	Sediment	Quartz					47	=	6	1S	47000	6000	OSL					single aliquot	well	yes	yes	Indirect	yes	QLD	2001	Roberts RG, TF Flannery, LK Ayliffe, H Yoshida, JM Olley, GM Prideaux, GM Laslett, A Baynes, MA Smith, R Jones, BL Smith Hiroyuki Yoshida,1 Jon M. Olley,4 Gavin J. Prideaux,5 Geoff M. Laslett,6 Alexander Baynes,7 M. A. Smith,8 Rhys Jones,9 Barton L. Smit	New ages for the last Australian megafauna: continent-wide extinction about 46,000 years ago	Science	292:1888-1892	m	A	Ned's Gully
1133	-31.0152	149.58	Diprotodontidae	Diprotodon	optatum	3	Sediment	Sediment					50	=	6	1S	50000	6000	OSL					single aliquot	well	yes	yes	Indirect	yes	NSW	2001	Roberts RG, TF Flannery, LK Ayliffe, H Yoshida, JM Olley, GM Prideaux, GM Laslett, A Baynes, MA Smith, R Jones, BL Smith Hiroyuki Yoshida,1 Jon M. Olley,4 Gavin J. Prideaux,5 Geoff M. Laslett,6 Alexander Baynes,7 M. A. Smith,8 Rhys Jones,9 Barton L. Smit	New ages for the last Australian megafauna: continent-wide extinction about 46,000 years ago	Science	292:1888-1892	m	A	Cox's Creek
1135	-34.02	141.342	Diprotodontidae	Diprotodon	optatum	9 & 10	Sediment	Quartz					52	=	8	1S	52000	8000	OSL					single aliquot	well	yes	yes	Indirect	yes	NSW	2001	Roberts RG, TF Flannery, LK Ayliffe, H Yoshida, JM Olley, GM Prideaux, GM Laslett, A Baynes, MA Smith, R Jones, BL Smith Hiroyuki Yoshida,1 Jon M. Olley,4 Gavin J. Prideaux,5 Geoff M. Laslett,6 Alexander Baynes,7 M. A. Smith,8 Rhys Jones,9 Barton L. Smit	New ages for the last Australian megafauna: continent-wide extinction about 46,000 years ago	Science	292:1888-1892	m	A	Lake Victoria
1137	-31.0152	149.58	Diprotodontidae	Diprotodon	optatum	3	Sediment	Quartz					53	=	5	1S	53000	5000	OSL					single aliquot	well	yes	yes	Indirect	yes	NSW	2001	Roberts RG, TF Flannery, LK Ayliffe, H Yoshida, JM Olley, GM Prideaux, GM Laslett, A Baynes, MA Smith, R Jones, BL Smith Hiroyuki Yoshida,1 Jon M. Olley,4 Gavin J. Prideaux,5 Geoff M. Laslett,6 Alexander Baynes,7 M. A. Smith,8 Rhys Jones,9 Barton L. Smit	New ages for the last Australian megafauna: continent-wide extinction about 46,000 years ago	Science	292:1888-1892	m	A	Cox's Creek
1138	-34.02	141.342	Diprotodontidae	Diprotodon	optatum	10	Sediment	Quartz					54	=	7	1S	54000	7000	OSL					single aliquot	well	yes	yes	Indirect	yes	NSW	2001	Roberts RG, TF Flannery, LK Ayliffe, H Yoshida, JM Olley, GM Prideaux, GM Laslett, A Baynes, MA Smith, R Jones, BL Smith Hiroyuki Yoshida,1 Jon M. Olley,4 Gavin J. Prideaux,5 Geoff M. Laslett,6 Alexander Baynes,7 M. A. Smith,8 Rhys Jones,9 Barton L. Smit	New ages for the last Australian megafauna: continent-wide extinction about 46,000 years ago	Science	292:1888-1892	m	A	Lake Victoria
1139	-31.0152	149.58	Diprotodontidae	Diprotodon	optatum	3	Sediment	Quartz					54	=	6	1S	54000	6000	OSL					single aliquot	well	yes	yes	Indirect	yes	NSW	2001	Roberts RG, TF Flannery, LK Ayliffe, H Yoshida, JM Olley, GM Prideaux, GM Laslett, A Baynes, MA Smith, R Jones, BL Smith Hiroyuki Yoshida,1 Jon M. Olley,4 Gavin J. Prideaux,5 Geoff M. Laslett,6 Alexander Baynes,7 M. A. Smith,8 Rhys Jones,9 Barton L. Smit	New ages for the last Australian megafauna: continent-wide extinction about 46,000 years ago	Science	292:1888-1892	m	A	Cox's Creek
1141	-29.8	140.167	Diprotodontidae	Diprotodon	optatum	21	Sediment	Quartz					75	=	9	1S	75000	9000	OSL					single aliquot	well	yes	yes	Indirect	yes	SA	2001	Roberts RG, TF Flannery, LK Ayliffe, H Yoshida, JM Olley, GM Prideaux, GM Laslett, A Baynes, MA Smith, R Jones, BL Smith Hiroyuki Yoshida,1 Jon M. Olley,4 Gavin J. Prideaux,5 Geoff M. Laslett,6 Alexander Baynes,7 M. A. Smith,8 Rhys Jones,9 Barton L. Smit	New ages for the last Australian megafauna: continent-wide extinction about 46,000 years ago	Science	292:1888-1892	m	A	Lake Callabonna
1142	-38.173	143.163	Diprotodontidae	Diprotodon	optatum	16	Sediment	Quartz					82	=	10	1S	82000	10000	OSL					single aliquot	well	yes	yes	Indirect	yes	VIC	2001	Roberts RG, TF Flannery, LK Ayliffe, H Yoshida, JM Olley, GM Prideaux, GM Laslett, A Baynes, MA Smith, R Jones, BL Smith Hiroyuki Yoshida,1 Jon M. Olley,4 Gavin J. Prideaux,5 Geoff M. Laslett,6 Alexander Baynes,7 M. A. Smith,8 Rhys Jones,9 Barton L. Smit	New ages for the last Australian megafauna: continent-wide extinction about 46,000 years ago	Science	292:1888-1892	m	A	Lake Colongulac
1162	-37.2667	144.233	Diprotodontidae	Diprotodon	species indet.	ANU-1052A	Tooth	Enamel					50.8	=	9.8	1S	50800	9800	LU-ESR			yes	assumed					Direct		VIC	1998	Van Huet S, R Gr√ºn, CV Murray-Wallace, N Redvers-Newton, JP White	Age of the Lancefield megafauna: a reappraisal	Australian Archaeology	46:5-11	m	A	Lancefield Swamp
1165	-27.95	151.733	Diprotodontidae	Diprotodon	species indet.	Ris√∏-060701	Sediment	Quartz					107	=	18	2S	107000	18000	OSL					single aliquot	well	yes	yes	Indirect	yes	QLD	2011	Price GJ, Webb GE, Zhao J-X, Feng Y-X, Murray AS Bernard N. Cooke b, Scott A. Hocknull e, Ian H. Sobbe	Dating megafaunal extinction on the Pleistocene Darling Downs, eastern Australia: the promise and pitfalls of dating as a test of extinction hypotheses	Quaternary Science Reviews	30:899-914	m	A	QML796
1166	-27.95	151.733	Diprotodontidae	Diprotodon	species indet.	Ris√∏-060703	Sediment	Quartz					112	=	20	2S	112000	20000	OSL					single aliquot	well	yes	yes	Indirect	yes	QLD	2011	Price GJ, Webb GE, Zhao J-X, Feng Y-X, Murray AS Bernard N. Cooke b, Scott A. Hocknull e, Ian H. Sobbe	Dating megafaunal extinction on the Pleistocene Darling Downs, eastern Australia: the promise and pitfalls of dating as a test of extinction hypotheses	Quaternary Science Reviews	30:899-914	m	A	QML796
1167	-27.95	151.733	Diprotodontidae	Diprotodon	species indet.	Ris√∏-060702	Sediment	Quartz					122	=	22	2S	122000	22000	OSL					single aliquot	well	yes	yes	Indirect	yes	QLD	2011	Price GJ, Webb GE, Zhao J-X, Feng Y-X, Murray AS Bernard N. Cooke b, Scott A. Hocknull e, Ian H. Sobbe	Dating megafaunal extinction on the Pleistocene Darling Downs, eastern Australia: the promise and pitfalls of dating as a test of extinction hypotheses	Quaternary Science Reviews	30:899-914	m	A	QML796
1175	-32.4667	137.7	Diprotodontidae	Diprotodon	species indet.	2084A	Tooth	Enamel					51	=	3	1S	51000	3000	CSUS-ESR									Direct		SA	2008	Gr√ºn R, Wells R, Eggins S, Spooner N, Aubert M, Brown L, Rhodes E	Electron spin resonance dating of South Australian megafauna sites	Australian Journal of Earth Sciences	55:917-935	m*	A*	Cooper's Dune
1177	-32.4667	137.7	Diprotodontidae	Diprotodon	species indet.	2085A	Tooth	Enamel					60	=	3	1S	60000	3000	CSUS-ESR									Direct		SA	2008	Gr√ºn R, Wells R, Eggins S, Spooner N, Aubert M, Brown L, Rhodes E	Electron spin resonance dating of South Australian megafauna sites	Australian Journal of Earth Sciences	55:917-935	m*	A*	Cooper's Dune
1178	-33.6667	139.083	Diprotodontidae	Diprotodon	species indet.	2178A	Tooth	Enamel					56	=	13	1S	56000	13000	CSUS-ESR									Direct		SA	2008	Gr√ºn R, Wells R, Eggins S, Spooner N, Aubert M, Brown L, Rhodes E	Electron spin resonance dating of South Australian megafauna sites	Australian Journal of Earth Sciences	55:917-935	m*	A*	Baldina Creek
1179	-32.4667	137.7	Diprotodontidae	Diprotodon	species indet.	2086A	Tooth	Enamel					58	=	2	1S	58000	2000	CSUS-ESR									Direct		SA	2008	Gr√ºn R, Wells R, Eggins S, Spooner N, Aubert M, Brown L, Rhodes E	Electron spin resonance dating of South Australian megafauna sites	Australian Journal of Earth Sciences	55:917-935	m*	A*	Cooper's Dune
1180	-37.5833	140.4	Diprotodontidae	Diprotodon	species indet.	2171A	Tooth	Enamel					84	=	7	1S	84000	7000	CSUS-ESR									Direct		SA	2008	Gr√ºn R, Wells R, Eggins S, Spooner N, Aubert M, Brown L, Rhodes E	Electron spin resonance dating of South Australian megafauna sites	Australian Journal of Earth Sciences	55:917-935	m*	A*	Millicent
1181	-37.5833	140.4	Diprotodontidae	Diprotodon	species indet.	2090A	Tooth	Enamel					98	=	8	1S	98000	8000	CSUS-ESR									Direct		SA	2008	Gr√ºn R, Wells R, Eggins S, Spooner N, Aubert M, Brown L, Rhodes E	Electron spin resonance dating of South Australian megafauna sites	Australian Journal of Earth Sciences	55:917-935	m*	A*	Millicent
3142	-35.2167	139.383	Dromornithidae	Genyornis	newtoni	20	Sediment	Quartz					55	=	5	1S	55000	5000	OSL					single aliquot	well	yes	yes	Indirect	yes	SA	2001	Roberts RG, TF Flannery, LK Ayliffe, H Yoshida, JM Olley, GM Prideaux, GM Laslett, A Baynes, MA Smith, R Jones, BL Smith Hiroyuki Yoshida,1 Jon M. Olley,4 Gavin J. Prideaux,5 Geoff M. Laslett,6 Alexander Baynes,7 M. A. Smith,8 Rhys Jones,9 Barton L. Smit	New ages for the last Australian megafauna: continent-wide extinction about 46,000 years ago	Science	292:1888-1892	m	A	Wood Point
3193	-38.29	142.49	Dromornithidae	Genyornis	newtoni	17	Sediment	Quartz					60	=	9	1S	60000	9000	OSL					single aliquot	well	yes	yes	Indirect	yes	VIC	2001	Roberts RG, TF Flannery, LK Ayliffe, H Yoshida, JM Olley, GM Prideaux, GM Laslett, A Baynes, MA Smith, R Jones, BL Smith Hiroyuki Yoshida,1 Jon M. Olley,4 Gavin J. Prideaux,5 Geoff M. Laslett,6 Alexander Baynes,7 M. A. Smith,8 Rhys Jones,9 Barton L. Smit	New ages for the last Australian megafauna: continent-wide extinction about 46,000 years ago	Science	292:1888-1892	m	A	Warrnambool
4075	-34.02	141.342	Macropodidae	Macropus	ferragus	9 & 10	Sediment	Quartz					52	=	8	1S	52000	8000	OSL					single aliquot	well	yes	yes	Indirect	yes	NSW	2001	Roberts RG, TF Flannery, LK Ayliffe, H Yoshida, JM Olley, GM Prideaux, GM Laslett, A Baynes, MA Smith, R Jones, BL Smith Hiroyuki Yoshida,1 Jon M. Olley,4 Gavin J. Prideaux,5 Geoff M. Laslett,6 Alexander Baynes,7 M. A. Smith,8 Rhys Jones,9 Barton L. Smit	New ages for the last Australian megafauna: continent-wide extinction about 46,000 years ago	Science	292:1888-1892	m	A	Lake Victoria
4076	-34.02	141.342	Macropodidae	Macropus	ferragus	10	Sediment	Quartz					54	=	7	1S	54000	7000	OSL					single aliquot	well	yes	yes	Indirect	yes	NSW	2001	Roberts RG, TF Flannery, LK Ayliffe, H Yoshida, JM Olley, GM Prideaux, GM Laslett, A Baynes, MA Smith, R Jones, BL Smith Hiroyuki Yoshida,1 Jon M. Olley,4 Gavin J. Prideaux,5 Geoff M. Laslett,6 Alexander Baynes,7 M. A. Smith,8 Rhys Jones,9 Barton L. Smit	New ages for the last Australian megafauna: continent-wide extinction about 46,000 years ago	Science	292:1888-1892	m	A	Lake Victoria
4087	-34.0667	115.017	Macropodidae	Macropus	fuliginosus/giganteus/titan	ANUA-10312	Sediment	Charcoal	ABOX-SC	ABOX	no	no	23.4	=	0.3	1S	27573	245	Radiocarbon (ABOX)									Indirect	yes	WA	2008	Ayliffe LK, GJ Prideaux, MI Bird, R Gr¬≥n, RG Roberts, GA Gully, R Jones, LK Fifield, RG Cresswell	Age constraints on Pleistocene megafauna at Tight Entrance Cave in southwestern Australia	Quaternary Science Reviews	27:1784-1788	m	A	Tight Entrance Cave
4088	-34.0667	115.017	Macropodidae	Macropus	fuliginosus/giganteus/titan	ANUA-10313	Sediment	Charcoal	ABOX-SC	ABOX	no	no	24.3	=	0.3	1S	28311	297	Radiocarbon (ABOX)									Indirect	yes	WA	2008	Ayliffe LK, GJ Prideaux, MI Bird, R Gr¬≥n, RG Roberts, GA Gully, R Jones, LK Fifield, RG Cresswell	Age constraints on Pleistocene megafauna at Tight Entrance Cave in southwestern Australia	Quaternary Science Reviews	27:1784-1788	m	A	Tight Entrance Cave
4090	-34.0667	115.017	Macropodidae	Macropus	fuliginosus/giganteus/titan	ANUA-10311	Sediment	Charcoal	ABOX-SC	ABOX	no	no	25.3	=	0.4	1S	29429	490	Radiocarbon (ABOX)									Indirect	yes	WA	2008	Ayliffe LK, GJ Prideaux, MI Bird, R Gr¬≥n, RG Roberts, GA Gully, R Jones, LK Fifield, RG Cresswell	Age constraints on Pleistocene megafauna at Tight Entrance Cave in southwestern Australia	Quaternary Science Reviews	27:1784-1788	m	A	Tight Entrance Cave
4092	-34.0667	115.017	Macropodidae	Macropus	fuliginosus/giganteus/titan	ANUA-10412	Sediment	Charcoal	ABOX-SC	ABOX	no	no	30.3	=	0.4	1S	34319	337	Radiocarbon (ABOX)									Indirect	yes	WA	2008	Ayliffe LK, GJ Prideaux, MI Bird, R Gr¬≥n, RG Roberts, GA Gully, R Jones, LK Fifield, RG Cresswell	Age constraints on Pleistocene megafauna at Tight Entrance Cave in southwestern Australia	Quaternary Science Reviews	27:1784-1788	m	A	Tight Entrance Cave
4093	-34.0667	115.017	Macropodidae	Macropus	fuliginosus/giganteus/titan	TEC-H	Sediment	Quartz					32	=	3	1S	32000	3000	OSL					single grain	partially	yes	no	Indirect	yes	WA	2010	Prideaux GJ, GA Gully, AMC Couzens, LK Ayliffe, NR Jankowski, Z Jacobs, RG Roberts, J C Hellstrom, MK Gagan, and LM Hatcher	Timing and dynamics of Late Pleistocene mammal extinctions in southwestern Australia	Proceedings of the National Academy of Sciences of the USA	107(51):22157-22162	m	A	Tight Entrance Cave
4094	-34.0667	115.017	Macropodidae	Macropus	fuliginosus/giganteus/titan	ANUA-10324	Sediment	Charcoal	ABOX-SC	ABOX	no	no	32.8	=	0.8	1S	37066	981	Radiocarbon (ABOX)									Indirect	yes	WA	2008	Ayliffe LK, GJ Prideaux, MI Bird, R Gr¬≥n, RG Roberts, GA Gully, R Jones, LK Fifield, RG Cresswell	Age constraints on Pleistocene megafauna at Tight Entrance Cave in southwestern Australia	Quaternary Science Reviews	27:1784-1788	m	A	Tight Entrance Cave
4095	-34.0667	115.017	Macropodidae	Macropus	fuliginosus/giganteus/titan	TEC99‚Äìunit D	Sediment	Quartz					33	=	3	1S	33000	3000	OSL					single grain	partially	yes	no	Indirect	yes	WA	2010	Prideaux GJ, GA Gully, AMC Couzens, LK Ayliffe, NR Jankowski, Z Jacobs, RG Roberts, J C Hellstrom, MK Gagan, and LM Hatcher	Timing and dynamics of Late Pleistocene mammal extinctions in southwestern Australia	Proceedings of the National Academy of Sciences of the USA	107(51):22157-22162	m	A	Tight Entrance Cave
4097	-34.0667	115.017	Macropodidae	Macropus	fuliginosus/giganteus/titan	TEC07‚Äì5	Sediment	Quartz					34	=	2	1S	34000	2000	OSL					single grain	partially	yes	no	Indirect	yes	WA	2010	Prideaux GJ, GA Gully, AMC Couzens, LK Ayliffe, NR Jankowski, Z Jacobs, RG Roberts, J C Hellstrom, MK Gagan, and LM Hatcher	Timing and dynamics of Late Pleistocene mammal extinctions in southwestern Australia	Proceedings of the National Academy of Sciences of the USA	107(51):22157-22162	m	A	Tight Entrance Cave
4103	-34.15	115.07	Macropodidae	Macropus	fuliginosus/giganteus/titan	ANUA-11709	Charcoal	Charcoal	ABOX-SC	ABOX	no	no	41.46	=	1.3	1S	45229	1307	Radiocarbon (ABOX)									Indirect	yes	WA	2001	Turney CSM, Bird MI, Fifield LK, Roberts RG, Smith M, Dortch CE, Gr√ºn R, Lawson E, Ayliffe LK, Miller GH, Dortch J, Cresswell RG	Early human occupation at Devil's Lair, Southwestern Australia 50,000 years ago	Quaternary Research	55(1):3-13	m	A	Devils Lair
4105	-34.0667	115.017	Macropodidae	Macropus	fuliginosus/giganteus/titan	TEC-F (WAM 07.6.147)	Sediment	Calcite					44.9	=	1.3	1S	44900	1300	U-series Th/U (ICP-MS)		yes							Indirect	yes	WA	2010	Prideaux GJ, GA Gully, AMC Couzens, LK Ayliffe, NR Jankowski, Z Jacobs, RG Roberts, J C Hellstrom, MK Gagan, and LM Hatcher	Timing and dynamics of Late Pleistocene mammal extinctions in southwestern Australia	Proceedings of the National Academy of Sciences of the USA	107(51):22157-22162	m	A	Tight Entrance Cave
4106	-34.052	115.026	Macropodidae	Macropus	fuliginosus/giganteus/titan	23	Sediment	Quartz					46	=	6	1S	46000	6000	OSL					single aliquot	well	yes	yes	Indirect	yes	WA	2001	Roberts RG, TF Flannery, LK Ayliffe, H Yoshida, JM Olley, GM Prideaux, GM Laslett, A Baynes, MA Smith, R Jones, BL Smith Hiroyuki Yoshida,1 Jon M. Olley,4 Gavin J. Prideaux,5 Geoff M. Laslett,6 Alexander Baynes,7 M. A. Smith,8 Rhys Jones,9 Barton L. Smit	New ages for the last Australian megafauna: continent-wide extinction about 46,000 years ago	Science	292:1888-1892	m	A	Kudjal Yolgah Cave
4107	-34.052	115.026	Macropodidae	Macropus	fuliginosus/giganteus/titan	23	Sediment	Quartz					46	=	2	1S	46000	2000	OSL					single aliquot	well	yes	yes	Indirect	yes	WA	2001	Roberts RG, TF Flannery, LK Ayliffe, H Yoshida, JM Olley, GM Prideaux, GM Laslett, A Baynes, MA Smith, R Jones, BL Smith Hiroyuki Yoshida,1 Jon M. Olley,4 Gavin J. Prideaux,5 Geoff M. Laslett,6 Alexander Baynes,7 M. A. Smith,8 Rhys Jones,9 Barton L. Smit	New ages for the last Australian megafauna: continent-wide extinction about 46,000 years ago	Science	292:1888-1892	m	A	Kudjal Yolgah Cave
4108	-27.9167	151.967	Macropodidae	Macropus	fuliginosus/giganteus/titan	1	Sediment	Quartz					46	=	6	1S	46000	6000	OSL					single aliquot	well	yes	yes	Indirect	yes	QLD	2001	Roberts RG, TF Flannery, LK Ayliffe, H Yoshida, JM Olley, GM Prideaux, GM Laslett, A Baynes, MA Smith, R Jones, BL Smith Hiroyuki Yoshida,1 Jon M. Olley,4 Gavin J. Prideaux,5 Geoff M. Laslett,6 Alexander Baynes,7 M. A. Smith,8 Rhys Jones,9 Barton L. Smit	New ages for the last Australian megafauna: continent-wide extinction about 46,000 years ago	Science	292:1888-1892	m	A	Ned's Gully
4109	-27.9167	151.967	Macropodidae	Macropus	fuliginosus/giganteus/titan	1	Sediment	Quartz					47	=	6	1S	47000	6000	OSL					single aliquot	well	yes	yes	Indirect	yes	QLD	2001	Roberts RG, TF Flannery, LK Ayliffe, H Yoshida, JM Olley, GM Prideaux, GM Laslett, A Baynes, MA Smith, R Jones, BL Smith Hiroyuki Yoshida,1 Jon M. Olley,4 Gavin J. Prideaux,5 Geoff M. Laslett,6 Alexander Baynes,7 M. A. Smith,8 Rhys Jones,9 Barton L. Smit	New ages for the last Australian megafauna: continent-wide extinction about 46,000 years ago	Science	292:1888-1892	m	A	Ned's Gully
4110	-34.0667	115.017	Macropodidae	Macropus	fuliginosus/giganteus/titan	TE-FS-16a	Flowstone	Calcite					47.8	=	2.8	1S	47800	2800	U-series Th/U (TIMS)		yes							Indirect	yes	WA	2008	Ayliffe LK, GJ Prideaux, MI Bird, R Gr¬≥n, RG Roberts, GA Gully, R Jones, LK Fifield, RG Cresswell	Age constraints on Pleistocene megafauna at Tight Entrance Cave in southwestern Australia	Quaternary Science Reviews	27:1784-1788	m	A	Tight Entrance Cave
4111	-34.0667	115.017	Macropodidae	Macropus	fuliginosus/giganteus/titan	TEC-F (unit G lower)	Sediment	Calcite					48.7	=	3	1S	48700	3000	U-series Th/U (ICP-MS)		yes							Indirect	yes	WA	2010	Prideaux GJ, GA Gully, AMC Couzens, LK Ayliffe, NR Jankowski, Z Jacobs, RG Roberts, J C Hellstrom, MK Gagan, and LM Hatcher	Timing and dynamics of Late Pleistocene mammal extinctions in southwestern Australia	Proceedings of the National Academy of Sciences of the USA	107(51):22157-22162	m	A	Tight Entrance Cave
4114	-40.8	145.13	Macropodidae	Macropus	fuliginosus/giganteus/titan	ST-1	Sediment	Quartz					56	=	4	1S	56000	4000	OSL					multi aliquot	well	yes	yes	Indirect	yes	TAS	2008	Turney CSM, Flannery TF, Roberts RG	Late-surviving megafauna in Tasmania, Australia, implicate human involvement in their extinction	Proceedings of the National Academy of Sciences of the USA	105(34):12150-12153	m	A	Scotchtown Cave
4115	-34.0667	115.02	Macropodidae	Macropus	fuliginosus/giganteus/titan	24	Sediment	Quartz					63	=	9	1S	63000	9000	OSL					single aliquot	well	yes	yes	Indirect	yes	WA	2001	Roberts RG, TF Flannery, LK Ayliffe, H Yoshida, JM Olley, GM Prideaux, GM Laslett, A Baynes, MA Smith, R Jones, BL Smith Hiroyuki Yoshida,1 Jon M. Olley,4 Gavin J. Prideaux,5 Geoff M. Laslett,6 Alexander Baynes,7 M. A. Smith,8 Rhys Jones,9 Barton L. Smit	New ages for the last Australian megafauna: continent-wide extinction about 46,000 years ago	Science	292:1888-1892	m	A	Mammoth Cave
4116	-37.0472	140.804	Macropodidae	Macropus	fuliginosus/giganteus/titan	GH09-2	Sediment	Quartz					70	=	6	2S	70000	6000	OSL					single grain	partially	yes	no	Indirect	yes	SA	2012	Macken AC, GJ Prideaux, EH Reed	Variation and pattern in the responses of mammal faunas to Late Pleistocene climatic change in southeastern South Australia	Journal of Quaternary Science	27(4):415-424	m	A	Victoria Fossil Cave
4117	-34.0667	115.017	Macropodidae	Macropus	fuliginosus/giganteus/titan	TEC‚ÄìF	Sediment	Quartz					70	=	4	1S	70000	4000	OSL					single grain	partially	yes	no	Indirect	yes	WA	2010	Prideaux GJ, GA Gully, AMC Couzens, LK Ayliffe, NR Jankowski, Z Jacobs, RG Roberts, J C Hellstrom, MK Gagan, and LM Hatcher	Timing and dynamics of Late Pleistocene mammal extinctions in southwestern Australia	Proceedings of the National Academy of Sciences of the USA	107(51):22157-22162	m	A	Tight Entrance Cave
4118	-38.1881	143.28	Macropodidae	Macropus	fuliginosus/giganteus/titan	15	Sediment	Quartz					70	=	8	1S	70000	8000	OSL					single aliquot	well	yes	yes	Indirect	yes	VIC	2001	Roberts RG, TF Flannery, LK Ayliffe, H Yoshida, JM Olley, GM Prideaux, GM Laslett, A Baynes, MA Smith, R Jones, BL Smith Hiroyuki Yoshida,1 Jon M. Olley,4 Gavin J. Prideaux,5 Geoff M. Laslett,6 Alexander Baynes,7 M. A. Smith,8 Rhys Jones,9 Barton L. Smit	New ages for the last Australian megafauna: continent-wide extinction about 46,000 years ago	Science	292:1888-1892	m	A	Lake Weeranganuk
4119	-34.0667	115.02	Macropodidae	Macropus	fuliginosus/giganteus/titan	24	Sediment	Sediment					74	=	10	1S	74000	10000	OSL					single aliquot	well	yes	yes	Indirect	yes	WA	2001	Roberts RG, TF Flannery, LK Ayliffe, H Yoshida, JM Olley, GM Prideaux, GM Laslett, A Baynes, MA Smith, R Jones, BL Smith Hiroyuki Yoshida,1 Jon M. Olley,4 Gavin J. Prideaux,5 Geoff M. Laslett,6 Alexander Baynes,7 M. A. Smith,8 Rhys Jones,9 Barton L. Smit	New ages for the last Australian megafauna: continent-wide extinction about 46,000 years ago	Science	292:1888-1892	m	A	Mammoth Cave
4120	-29.8	140.167	Macropodidae	Macropus	fuliginosus/giganteus/titan	21	Sediment	Quartz					75	=	9	1S	75000	9000	OSL					single aliquot	well	yes	yes	Indirect	yes	SA	2001	Roberts RG, TF Flannery, LK Ayliffe, H Yoshida, JM Olley, GM Prideaux, GM Laslett, A Baynes, MA Smith, R Jones, BL Smith Hiroyuki Yoshida,1 Jon M. Olley,4 Gavin J. Prideaux,5 Geoff M. Laslett,6 Alexander Baynes,7 M. A. Smith,8 Rhys Jones,9 Barton L. Smit	New ages for the last Australian megafauna: continent-wide extinction about 46,000 years ago	Science	292:1888-1892	m	A	Lake Callabonna
4121	-37.0472	140.804	Macropodidae	Macropus	fuliginosus/giganteus/titan	GH09-5	Sediment	Quartz					76	=	6	2S	76000	6000	OSL					single grain	partially	yes	no	Indirect	yes	SA	2012	Macken AC, GJ Prideaux, EH Reed	Variation and pattern in the responses of mammal faunas to Late Pleistocene climatic change in southeastern South Australia	Journal of Quaternary Science	27(4):415-424	m	A	Victoria Fossil Cave
4122	-37.0472	140.804	Macropodidae	Macropus	fuliginosus/giganteus/titan	GH09-1	Sediment	Quartz					82	=	6	2S	82000	6000	OSL					single grain	partially	yes	no	Indirect	yes	SA	2012	Macken AC, GJ Prideaux, EH Reed	Variation and pattern in the responses of mammal faunas to Late Pleistocene climatic change in southeastern South Australia	Journal of Quaternary Science	27(4):415-424	m	A	Victoria Fossil Cave
4123	-37.0472	140.804	Macropodidae	Macropus	fuliginosus/giganteus/titan	GH09-3	Sediment	Quartz					82	=	8	2S	82000	8000	OSL					single grain	partially	yes	no	Indirect	yes	SA	2012	Macken AC, GJ Prideaux, EH Reed	Variation and pattern in the responses of mammal faunas to Late Pleistocene climatic change in southeastern South Australia	Journal of Quaternary Science	27(4):415-424	m	A	Victoria Fossil Cave
4124	-38.173	143.163	Macropodidae	Macropus	fuliginosus/giganteus/titan	16	Sediment	Quartz					82	=	10	1S	82000	10000	OSL					single aliquot	well	yes	yes	Indirect	yes	VIC	2001	Roberts RG, TF Flannery, LK Ayliffe, H Yoshida, JM Olley, GM Prideaux, GM Laslett, A Baynes, MA Smith, R Jones, BL Smith Hiroyuki Yoshida,1 Jon M. Olley,4 Gavin J. Prideaux,5 Geoff M. Laslett,6 Alexander Baynes,7 M. A. Smith,8 Rhys Jones,9 Barton L. Smit	New ages for the last Australian megafauna: continent-wide extinction about 46,000 years ago	Science	292:1888-1892	m	A	Lake Colongulac
4125	-38.0847	143.682	Macropodidae	Macropus	fuliginosus/giganteus/titan	13	Sediment	Quartz					82	=	9	1S	82000	9000	OSL					single aliquot	well	yes	yes	Indirect	yes	VIC	2001	Roberts RG, TF Flannery, LK Ayliffe, H Yoshida, JM Olley, GM Prideaux, GM Laslett, A Baynes, MA Smith, R Jones, BL Smith Hiroyuki Yoshida,1 Jon M. Olley,4 Gavin J. Prideaux,5 Geoff M. Laslett,6 Alexander Baynes,7 M. A. Smith,8 Rhys Jones,9 Barton L. Smit	New ages for the last Australian megafauna: continent-wide extinction about 46,000 years ago	Science	292:1888-1892	m	A	Lake Weering
4127	-34.02	141.342	Macropodidae	Macropus	fuliginosus/giganteus/titan	11	Sediment	Quartz					97	=	11	1S	97000	11000	OSL					single aliquot	well	yes	yes	Indirect	yes	NSW	2001	Roberts RG, TF Flannery, LK Ayliffe, H Yoshida, JM Olley, GM Prideaux, GM Laslett, A Baynes, MA Smith, R Jones, BL Smith Hiroyuki Yoshida,1 Jon M. Olley,4 Gavin J. Prideaux,5 Geoff M. Laslett,6 Alexander Baynes,7 M. A. Smith,8 Rhys Jones,9 Barton L. Smit	New ages for the last Australian megafauna: continent-wide extinction about 46,000 years ago	Science	292:1888-1892	m	A	Lake Victoria
4128	-42.5333	146.45	Macropodidae	Macropus	fuliginosus/giganteus/titan	JF-155	Sediment	Quartz					103	=	9	1S	103000	9000	OSL					multi aliquot	well	yes	yes	Indirect	yes	TAS	2008	Turney CSM, Flannery TF, Roberts RG	Late-surviving megafauna in Tasmania, Australia, implicate human involvement in their extinction	Proceedings of the National Academy of Sciences of the USA	105(34):12150-12153	m	A	Un-named Cave
4129	-27.95	151.733	Macropodidae	Macropus	fuliginosus/giganteus/titan	Ris√∏-060701	Sediment	Quartz					107	=	18	2S	107000	18000	OSL					single aliquot	well	yes	yes	Indirect	yes	QLD	2011	Price GJ, Webb GE, Zhao J-X, Feng Y-X, Murray AS Bernard N. Cooke b, Scott A. Hocknull e, Ian H. Sobbe	Dating megafaunal extinction on the Pleistocene Darling Downs, eastern Australia: the promise and pitfalls of dating as a test of extinction hypotheses	Quaternary Science Reviews	30:899-914	m	A	QML796
4130	-27.95	151.733	Macropodidae	Macropus	fuliginosus/giganteus/titan	Ris√∏-060703	Sediment	Quartz					112	=	20	2S	112000	20000	OSL					single aliquot	well	yes	yes	Indirect	yes	QLD	2011	Price GJ, Webb GE, Zhao J-X, Feng Y-X, Murray AS Bernard N. Cooke b, Scott A. Hocknull e, Ian H. Sobbe	Dating megafaunal extinction on the Pleistocene Darling Downs, eastern Australia: the promise and pitfalls of dating as a test of extinction hypotheses	Quaternary Science Reviews	30:899-914	m	A	QML796
4131	-34.0667	115.017	Macropodidae	Macropus	fuliginosus/giganteus/titan	TEC-F	Sediment	Calcite					112	=	11	1S	112000	11000	U-series Th/U (ICP-MS)		yes							Indirect	yes	WA	2010	Prideaux GJ, GA Gully, AMC Couzens, LK Ayliffe, NR Jankowski, Z Jacobs, RG Roberts, J C Hellstrom, MK Gagan, and LM Hatcher	Timing and dynamics of Late Pleistocene mammal extinctions in southwestern Australia	Proceedings of the National Academy of Sciences of the USA	107(51):22157-22162	m	A	Tight Entrance Cave
4132	-34.0667	115.017	Macropodidae	Macropus	fuliginosus/giganteus/titan	TE-FS-21a	Flowstone	Calcite					119.5	=	3.7	1S	119500	3700	U-series Th/U (TIMS)		yes							Indirect	yes	WA	2008	Ayliffe LK, GJ Prideaux, MI Bird, R Gr¬≥n, RG Roberts, GA Gully, R Jones, LK Fifield, RG Cresswell	Age constraints on Pleistocene megafauna at Tight Entrance Cave in southwestern Australia	Quaternary Science Reviews	27:1784-1788	m	A	Tight Entrance Cave
4133	-27.95	151.733	Macropodidae	Macropus	fuliginosus/giganteus/titan	Ris√∏-060702	Sediment	Quartz					122	=	22	2S	122000	22000	OSL					single aliquot	well	yes	yes	Indirect	yes	QLD	2011	Price GJ, Webb GE, Zhao J-X, Feng Y-X, Murray AS Bernard N. Cooke b, Scott A. Hocknull e, Ian H. Sobbe	Dating megafaunal extinction on the Pleistocene Darling Downs, eastern Australia: the promise and pitfalls of dating as a test of extinction hypotheses	Quaternary Science Reviews	30:899-914	m	A	QML796
4134	-34.2725	115.096	Macropodidae	Macropus	fuliginosus/giganteus/titan	25	Sediment	Quartz					131	=	14	1S	131000	14000	OSL					single aliquot	well	yes	yes	Indirect	yes	WA	2001	Roberts RG, TF Flannery, LK Ayliffe, H Yoshida, JM Olley, GM Prideaux, GM Laslett, A Baynes, MA Smith, R Jones, BL Smith Hiroyuki Yoshida,1 Jon M. Olley,4 Gavin J. Prideaux,5 Geoff M. Laslett,6 Alexander Baynes,7 M. A. Smith,8 Rhys Jones,9 Barton L. Smit	New ages for the last Australian megafauna: continent-wide extinction about 46,000 years ago	Science	292:1888-1892	m	A	Moondyne Cave
4135	-34.0667	115.017	Macropodidae	Macropus	fuliginosus/giganteus/titan	TEC07‚Äì1	Sediment	Quartz					135	=	7	1S	135000	7000	OSL					single grain	well	yes	yes	Indirect	yes	WA	2010	Prideaux GJ, GA Gully, AMC Couzens, LK Ayliffe, NR Jankowski, Z Jacobs, RG Roberts, J C Hellstrom, MK Gagan, and LM Hatcher	Timing and dynamics of Late Pleistocene mammal extinctions in southwestern Australia	Proceedings of the National Academy of Sciences of the USA	107(51):22157-22162	m	A	Tight Entrance Cave
4136	-34.0667	115.017	Macropodidae	Macropus	fuliginosus/giganteus/titan	TE-FS-UG	Flowstone	Calcite					136.8	=	2.6	1S	136800	2600	U-series Th/U (TIMS)		yes							Indirect	yes	WA	2008	Ayliffe LK, GJ Prideaux, MI Bird, R Gr¬≥n, RG Roberts, GA Gully, R Jones, LK Fifield, RG Cresswell	Age constraints on Pleistocene megafauna at Tight Entrance Cave in southwestern Australia	Quaternary Science Reviews	27:1784-1788	m	A	Tight Entrance Cave
4138	-34.0667	115.017	Macropodidae	Macropus	fuliginosus/giganteus/titan	TEC-97	Sediment	Calcite					151	=	7	1S	151000	7000	U-series Th/U (ICP-MS)		yes							Indirect	yes	WA	2010	Prideaux GJ, GA Gully, AMC Couzens, LK Ayliffe, NR Jankowski, Z Jacobs, RG Roberts, J C Hellstrom, MK Gagan, and LM Hatcher	Timing and dynamics of Late Pleistocene mammal extinctions in southwestern Australia	Proceedings of the National Academy of Sciences of the USA	107(51):22157-22162	m	A	Tight Entrance Cave
4139	-37.0472	140.804	Macropodidae	Macropus	fuliginosus/giganteus/titan	19	Sediment	Quartz					164	=	15	1S	164000	15000	OSL					single aliquot	well	yes	yes	Indirect	yes	SA	2001	Roberts RG, TF Flannery, LK Ayliffe, H Yoshida, JM Olley, GM Prideaux, GM Laslett, A Baynes, MA Smith, R Jones, BL Smith Hiroyuki Yoshida,1 Jon M. Olley,4 Gavin J. Prideaux,5 Geoff M. Laslett,6 Alexander Baynes,7 M. A. Smith,8 Rhys Jones,9 Barton L. Smit	New ages for the last Australian megafauna: continent-wide extinction about 46,000 years ago	Science	292:1888-1892	m	A	Victoria Fossil Cave
4140	-37.0333	140.8	Macropodidae	Macropus	fuliginosus/giganteus/titan	NC1	Sediment	Quartz					206	=	16	2S	206000	16000	OSL					single aliquot	well	yes	yes	Indirect	yes	SA	2007	Prideaux GJ, RG Roberts, D Megirian, KE Westaway, JC Hellstrom, JM Olley	Mammalian responses to Pleistocene climate change in southeastern Australia	Geology	35(1):33-36	m	A	Cathedral Cave
4141	-37.0333	140.8	Macropodidae	Macropus	fuliginosus/giganteus/titan	NC2	Sediment	Quartz					231	=	21	2S	231000	21000	OSL					single aliquot	well	yes	yes	Indirect	yes	SA	2007	Prideaux GJ, RG Roberts, D Megirian, KE Westaway, JC Hellstrom, JM Olley	Mammalian responses to Pleistocene climate change in southeastern Australia	Geology	35(1):33-36	m	A	Cathedral Cave
4142	-37.0333	140.8	Macropodidae	Macropus	fuliginosus/giganteus/titan	NC3	Sediment	Quartz					257	=	21	2S	257000	21000	OSL					single aliquot	well	yes	yes	Indirect	yes	SA	2007	Prideaux GJ, RG Roberts, D Megirian, KE Westaway, JC Hellstrom, JM Olley	Mammalian responses to Pleistocene climate change in southeastern Australia	Geology	35(1):33-36	m	A	Cathedral Cave
4145	-37.0333	140.8	Macropodidae	Macropus	fuliginosus/giganteus/titan	NC4	Sediment	Quartz					292	=	19	2S	292000	19000	OSL					single aliquot	well	yes	yes	Indirect	yes	SA	2007	Prideaux GJ, RG Roberts, D Megirian, KE Westaway, JC Hellstrom, JM Olley	Mammalian responses to Pleistocene climate change in southeastern Australia	Geology	35(1):33-36	m	A	Cathedral Cave
4146	-37.0333	140.8	Macropodidae	Macropus	fuliginosus/giganteus/titan	NCF1-3 mid	Flowstone	Calcite					297	=	9	2S	297000	9000	U-series Th/U (ICP-MS)	yes	yes							Indirect	yes	SA	2007	Prideaux GJ, RG Roberts, D Megirian, KE Westaway, JC Hellstrom, JM Olley	Mammalian responses to Pleistocene climate change in southeastern Australia	Geology	35(1):33-36	m	A	Cathedral Cave
4148	-37.0333	140.8	Macropodidae	Macropus	fuliginosus/giganteus/titan	NC5	Sediment	Quartz					513	=	73	2S	513000	73000	OSL					single aliquot	well	yes	yes	Indirect	yes	SA	2007	Prideaux GJ, RG Roberts, D Megirian, KE Westaway, JC Hellstrom, JM Olley	Mammalian responses to Pleistocene climate change in southeastern Australia	Geology	35(1):33-36	m	A	Cathedral Cave
4149	-37.0333	140.8	Macropodidae	Macropus	fuliginosus/giganteus/titan	NC6	Sediment	Quartz					535	=	49	2S	535000	49000	OSL					single aliquot	well	yes	yes	Indirect	yes	SA	2007	Prideaux GJ, RG Roberts, D Megirian, KE Westaway, JC Hellstrom, JM Olley	Mammalian responses to Pleistocene climate change in southeastern Australia	Geology	35(1):33-36	m	A	Cathedral Cave
4151	-30.3486	147.343	Macropodidae	Macropus	fuliginosus/giganteus/titan	2065	Tooth	Enamel					876	=	206	1S	876000	206000	EU-ESR			yes	in situ					Direct		NSW	2010	Gr√ºn R, S Eggins, M Aubert, N Spooner, AWG Pike, W M√ºller.	ESR and U-series analyses of faunal material from Cuddie Springs, NSW, Australia: implications for the timing of the extinction of the Australian megafauna	Quaternary Science Reviews	29:596-610	m*	A*	Cuddie Springs
4363	-37.0472	140.804	Macropodidae	Macropus	greyi	GH09-5	Sediment	Quartz					76	=	6	2S	76000	6000	OSL					single grain	partially	yes	no	Indirect	yes	SA	2012	Macken AC, GJ Prideaux, EH Reed	Variation and pattern in the responses of mammal faunas to Late Pleistocene climatic change in southeastern South Australia	Journal of Quaternary Science	27(4):415-424	m	A	Victoria Fossil Cave
4364	-37.0472	140.804	Macropodidae	Macropus	greyi	GH09-4	Sediment	Quartz					77	=	6	2S	77000	6000	OSL					single grain	partially	yes	no	Indirect	yes	SA	2012	Macken AC, GJ Prideaux, EH Reed	Variation and pattern in the responses of mammal faunas to Late Pleistocene climatic change in southeastern South Australia	Journal of Quaternary Science	27(4):415-424	m	A	Victoria Fossil Cave
4365	-37.0472	140.804	Macropodidae	Macropus	greyi	GH09-1	Sediment	Quartz					82	=	6	2S	82000	6000	OSL					single grain	partially	yes	no	Indirect	yes	SA	2012	Macken AC, GJ Prideaux, EH Reed	Variation and pattern in the responses of mammal faunas to Late Pleistocene climatic change in southeastern South Australia	Journal of Quaternary Science	27(4):415-424	m	A	Victoria Fossil Cave
4366	-37.0472	140.804	Macropodidae	Macropus	greyi	GH09-3	Sediment	Quartz					82	=	8	2S	82000	8000	OSL					single grain	partially	yes	no	Indirect	yes	SA	2012	Macken AC, GJ Prideaux, EH Reed	Variation and pattern in the responses of mammal faunas to Late Pleistocene climatic change in southeastern South Australia	Journal of Quaternary Science	27(4):415-424	m	A	Victoria Fossil Cave
4367	-37.0333	140.8	Macropodidae	Macropus	greyi	NC1	Sediment	Quartz					206	=	16	2S	206000	16000	OSL					single aliquot	well	yes	yes	Indirect	yes	SA	2007	Prideaux GJ, RG Roberts, D Megirian, KE Westaway, JC Hellstrom, JM Olley	Mammalian responses to Pleistocene climate change in southeastern Australia	Geology	35(1):33-36	m	A	Cathedral Cave
4368	-37.0333	140.8	Macropodidae	Macropus	greyi	NC3	Sediment	Quartz					257	=	21	2S	257000	21000	OSL					single aliquot	well	yes	yes	Indirect	yes	SA	2007	Prideaux GJ, RG Roberts, D Megirian, KE Westaway, JC Hellstrom, JM Olley	Mammalian responses to Pleistocene climate change in southeastern Australia	Geology	35(1):33-36	m	A	Cathedral Cave
4370	-37.0333	140.8	Macropodidae	Macropus	greyi	NC4	Sediment	Quartz					292	=	19	2S	292000	19000	OSL					single aliquot	well	yes	yes	Indirect	yes	SA	2007	Prideaux GJ, RG Roberts, D Megirian, KE Westaway, JC Hellstrom, JM Olley	Mammalian responses to Pleistocene climate change in southeastern Australia	Geology	35(1):33-36	m	A	Cathedral Cave
4371	-37.0333	140.8	Macropodidae	Macropus	greyi	NCF1-3 mid	Flowstone	Calcite					297	=	9	2S	297000	9000	U-series Th/U (ICP-MS)	yes	yes							Indirect	yes	SA	2007	Prideaux GJ, RG Roberts, D Megirian, KE Westaway, JC Hellstrom, JM Olley	Mammalian responses to Pleistocene climate change in southeastern Australia	Geology	35(1):33-36	m	A	Cathedral Cave
4373	-37.0333	140.8	Macropodidae	Macropus	greyi	NC5	Sediment	Quartz					513	=	73	2S	513000	73000	OSL					single aliquot	well	yes	yes	Indirect	yes	SA	2007	Prideaux GJ, RG Roberts, D Megirian, KE Westaway, JC Hellstrom, JM Olley	Mammalian responses to Pleistocene climate change in southeastern Australia	Geology	35(1):33-36	m	A	Cathedral Cave
4374	-37.0333	140.8	Macropodidae	Macropus	greyi	NC6	Sediment	Quartz					535	=	49	2S	535000	49000	OSL					single aliquot	well	yes	yes	Indirect	yes	SA	2007	Prideaux GJ, RG Roberts, D Megirian, KE Westaway, JC Hellstrom, JM Olley	Mammalian responses to Pleistocene climate change in southeastern Australia	Geology	35(1):33-36	m	A	Cathedral Cave
4475	-27.95	151.733	Macropodidae	Macropus	pearsoni	Ris√∏-060703	Sediment	Quartz					112	=	20	2S	112000	20000	OSL					single aliquot	well	yes	yes	Indirect	yes	QLD	2011	Price GJ, Webb GE, Zhao J-X, Feng Y-X, Murray AS Bernard N. Cooke b, Scott A. Hocknull e, Ian H. Sobbe	Dating megafaunal extinction on the Pleistocene Darling Downs, eastern Australia: the promise and pitfalls of dating as a test of extinction hypotheses	Quaternary Science Reviews	30:899-914	m	A	QML796
4627	-27.95	151.733	Macropodidae	Macropus	siva	Ris√∏-060701	Sediment	Quartz					107	=	18	2S	107000	18000	OSL					single aliquot	well	yes	yes	Indirect	yes	QLD	2011	Price GJ, Webb GE, Zhao J-X, Feng Y-X, Murray AS Bernard N. Cooke b, Scott A. Hocknull e, Ian H. Sobbe	Dating megafaunal extinction on the Pleistocene Darling Downs, eastern Australia: the promise and pitfalls of dating as a test of extinction hypotheses	Quaternary Science Reviews	30:899-914	m	A	QML796
4628	-27.95	151.733	Macropodidae	Macropus	siva	Ris√∏-060702	Sediment	Quartz					122	=	22	2S	122000	22000	OSL					single aliquot	well	yes	yes	Indirect	yes	QLD	2011	Price GJ, Webb GE, Zhao J-X, Feng Y-X, Murray AS Bernard N. Cooke b, Scott A. Hocknull e, Ian H. Sobbe	Dating megafaunal extinction on the Pleistocene Darling Downs, eastern Australia: the promise and pitfalls of dating as a test of extinction hypotheses	Quaternary Science Reviews	30:899-914	m	A	QML796
4740	-34.0667	115.017	Macropodidae	Macropus	thor	TEC‚ÄìF	Sediment	Quartz					70	=	4	1S	70000	4000	OSL					single grain	partially	yes	no	Indirect	yes	WA	2010	Prideaux GJ, GA Gully, AMC Couzens, LK Ayliffe, NR Jankowski, Z Jacobs, RG Roberts, J C Hellstrom, MK Gagan, and LM Hatcher	Timing and dynamics of Late Pleistocene mammal extinctions in southwestern Australia	Proceedings of the National Academy of Sciences of the USA	107(51):22157-22162	m	A	Tight Entrance Cave
4741	-34.0667	115.017	Macropodidae	Macropus	sp nov	TEC-F	Sediment	Calcite					112	=	11	1S	112000	11000	U-series Th/U (ICP-MS)		yes							Indirect	yes	WA	2010	Prideaux GJ, GA Gully, AMC Couzens, LK Ayliffe, NR Jankowski, Z Jacobs, RG Roberts, J C Hellstrom, MK Gagan, and LM Hatcher	Timing and dynamics of Late Pleistocene mammal extinctions in southwestern Australia	Proceedings of the National Academy of Sciences of the USA	107(51):22157-22162	m	A	Tight Entrance Cave
4742	-34.0667	115.017	Macropodidae	Macropus	sp nov	TE-FS-21a	Flowstone	Calcite					119.5	=	3.7	1S	119500	3700	U-series Th/U (TIMS)		yes							Indirect	yes	WA	2008	Ayliffe LK, GJ Prideaux, MI Bird, R Gr¬≥n, RG Roberts, GA Gully, R Jones, LK Fifield, RG Cresswell	Age constraints on Pleistocene megafauna at Tight Entrance Cave in southwestern Australia	Quaternary Science Reviews	27:1784-1788	m	A	Tight Entrance Cave
4743	-34.0667	115.017	Macropodidae	Macropus	thor	TEC07‚Äì1	Sediment	Quartz					135	=	7	1S	135000	7000	OSL					single grain	well	yes	yes	Indirect	yes	WA	2010	Prideaux GJ, GA Gully, AMC Couzens, LK Ayliffe, NR Jankowski, Z Jacobs, RG Roberts, J C Hellstrom, MK Gagan, and LM Hatcher	Timing and dynamics of Late Pleistocene mammal extinctions in southwestern Australia	Proceedings of the National Academy of Sciences of the USA	107(51):22157-22162	m	A	Tight Entrance Cave
4744	-34.0667	115.017	Macropodidae	Macropus	sp nov	TE-FS-UG	Flowstone	Calcite					136.8	=	2.6	1S	136800	2600	U-series Th/U (TIMS)		yes							Indirect	yes	WA	2008	Ayliffe LK, GJ Prideaux, MI Bird, R Gr¬≥n, RG Roberts, GA Gully, R Jones, LK Fifield, RG Cresswell	Age constraints on Pleistocene megafauna at Tight Entrance Cave in southwestern Australia	Quaternary Science Reviews	27:1784-1788	m	A	Tight Entrance Cave
4746	-34.0667	115.017	Macropodidae	Macropus	sp nov	TEC-97	Sediment	Calcite					151	=	7	1S	151000	7000	U-series Th/U (ICP-MS)		yes							Indirect	yes	WA	2010	Prideaux GJ, GA Gully, AMC Couzens, LK Ayliffe, NR Jankowski, Z Jacobs, RG Roberts, J C Hellstrom, MK Gagan, and LM Hatcher	Timing and dynamics of Late Pleistocene mammal extinctions in southwestern Australia	Proceedings of the National Academy of Sciences of the USA	107(51):22157-22162	m	A	Tight Entrance Cave
4747	-37.0333	140.8	Macropodidae	Macropus	thor	NC5	Sediment	Quartz					513	=	73	2S	513000	73000	OSL					single aliquot	well	yes	yes	Indirect	yes	SA	2007	Prideaux GJ, RG Roberts, D Megirian, KE Westaway, JC Hellstrom, JM Olley	Mammalian responses to Pleistocene climate change in southeastern Australia	Geology	35(1):33-36	m	A	Cathedral Cave
4748	-37.0333	140.8	Macropodidae	Macropus	thor	NC6	Sediment	Quartz					535	=	49	2S	535000	49000	OSL					single aliquot	well	yes	yes	Indirect	yes	SA	2007	Prideaux GJ, RG Roberts, D Megirian, KE Westaway, JC Hellstrom, JM Olley	Mammalian responses to Pleistocene climate change in southeastern Australia	Geology	35(1):33-36	m	A	Cathedral Cave
4879	-34.0667	115.02	Tachyglossidae	Megalibgwilia	ramsayi	24	Sediment	Quartz					63	=	9	1S	63000	9000	OSL					single aliquot	well	yes	yes	Indirect	yes	WA	2001	Roberts RG, TF Flannery, LK Ayliffe, H Yoshida, JM Olley, GM Prideaux, GM Laslett, A Baynes, MA Smith, R Jones, BL Smith Hiroyuki Yoshida,1 Jon M. Olley,4 Gavin J. Prideaux,5 Geoff M. Laslett,6 Alexander Baynes,7 M. A. Smith,8 Rhys Jones,9 Barton L. Smit	New ages for the last Australian megafauna: continent-wide extinction about 46,000 years ago	Science	292:1888-1892	m	A	Mammoth Cave
4880	-34.0667	115.02	Tachyglossidae	Megalibgwilia	ramsayi	24	Sediment	Sediment					74	=	10	1S	74000	10000	OSL					single aliquot	well	yes	yes	Indirect	yes	WA	2001	Roberts RG, TF Flannery, LK Ayliffe, H Yoshida, JM Olley, GM Prideaux, GM Laslett, A Baynes, MA Smith, R Jones, BL Smith Hiroyuki Yoshida,1 Jon M. Olley,4 Gavin J. Prideaux,5 Geoff M. Laslett,6 Alexander Baynes,7 M. A. Smith,8 Rhys Jones,9 Barton L. Smit	New ages for the last Australian megafauna: continent-wide extinction about 46,000 years ago	Science	292:1888-1892	m	A	Mammoth Cave
4881	-34.0667	115.017	Tachyglossidae	Megalibgwilia	ramsayi	TEC-F	Sediment	Calcite					112	=	11	1S	112000	11000	U-series Th/U (ICP-MS)		yes							Indirect	yes	WA	2010	Prideaux GJ, GA Gully, AMC Couzens, LK Ayliffe, NR Jankowski, Z Jacobs, RG Roberts, J C Hellstrom, MK Gagan, and LM Hatcher	Timing and dynamics of Late Pleistocene mammal extinctions in southwestern Australia	Proceedings of the National Academy of Sciences of the USA	107(51):22157-22162	m	A	Tight Entrance Cave
4882	-34.0667	115.017	Tachyglossidae	Megalibgwilia	ramsayi	TE-FS-21a	Flowstone	Calcite					119.5	=	3.7	1S	119500	3700	U-series Th/U (TIMS)		yes							Indirect	yes	WA	2008	Ayliffe LK, GJ Prideaux, MI Bird, R Gr¬≥n, RG Roberts, GA Gully, R Jones, LK Fifield, RG Cresswell	Age constraints on Pleistocene megafauna at Tight Entrance Cave in southwestern Australia	Quaternary Science Reviews	27:1784-1788	m	A	Tight Entrance Cave
4883	-34.2725	115.096	Tachyglossidae	Megalibgwilia	ramsayi	25	Sediment	Quartz					131	=	14	1S	131000	14000	OSL					single aliquot	well	yes	yes	Indirect	yes	WA	2001	Roberts RG, TF Flannery, LK Ayliffe, H Yoshida, JM Olley, GM Prideaux, GM Laslett, A Baynes, MA Smith, R Jones, BL Smith Hiroyuki Yoshida,1 Jon M. Olley,4 Gavin J. Prideaux,5 Geoff M. Laslett,6 Alexander Baynes,7 M. A. Smith,8 Rhys Jones,9 Barton L. Smit	New ages for the last Australian megafauna: continent-wide extinction about 46,000 years ago	Science	292:1888-1892	m	A	Moondyne Cave
4884	-34.0667	115.017	Tachyglossidae	Megalibgwilia	ramsayi	TE-FS-UG	Flowstone	Calcite					136.8	=	2.6	1S	136800	2600	U-series Th/U (TIMS)		yes							Indirect	yes	WA	2008	Ayliffe LK, GJ Prideaux, MI Bird, R Gr¬≥n, RG Roberts, GA Gully, R Jones, LK Fifield, RG Cresswell	Age constraints on Pleistocene megafauna at Tight Entrance Cave in southwestern Australia	Quaternary Science Reviews	27:1784-1788	m	A	Tight Entrance Cave
4903	-40.8	145.13	Tachyglossidae	Megalibgwilia	species indet.	ST-1	Sediment	Quartz					56	=	4	1S	56000	4000	OSL					multi aliquot	well	yes	yes	Indirect	yes	TAS	2008	Turney CSM, Flannery TF, Roberts RG	Late-surviving megafauna in Tasmania, Australia, implicate human involvement in their extinction	Proceedings of the National Academy of Sciences of the USA	105(34):12150-12153	m	A	Scotchtown Cave
4965	-40.8	145.13	Macropodidae	Metasthenurus	newtonae	ST-1	Sediment	Quartz					56	=	4	1S	56000	4000	OSL					multi aliquot	well	yes	yes	Indirect	yes	TAS	2008	Turney CSM, Flannery TF, Roberts RG	Late-surviving megafauna in Tasmania, Australia, implicate human involvement in their extinction	Proceedings of the National Academy of Sciences of the USA	105(34):12150-12153	m	A	Scotchtown Cave
4967	-34.0667	115.017	Macropodidae	Metasthenurus	newtonae	TEC-F	Sediment	Calcite					112	=	11	1S	112000	11000	U-series Th/U (ICP-MS)		yes							Indirect	yes	WA	2010	Prideaux GJ, GA Gully, AMC Couzens, LK Ayliffe, NR Jankowski, Z Jacobs, RG Roberts, J C Hellstrom, MK Gagan, and LM Hatcher	Timing and dynamics of Late Pleistocene mammal extinctions in southwestern Australia	Proceedings of the National Academy of Sciences of the USA	107(51):22157-22162	m	A	Tight Entrance Cave
4968	-34.0667	115.017	Macropodidae	Metasthenurus	newtonae	TE-FS-21a	Flowstone	Calcite					119.5	=	3.7	1S	119500	3700	U-series Th/U (TIMS)		yes							Indirect	yes	WA	2008	Ayliffe LK, GJ Prideaux, MI Bird, R Gr¬≥n, RG Roberts, GA Gully, R Jones, LK Fifield, RG Cresswell	Age constraints on Pleistocene megafauna at Tight Entrance Cave in southwestern Australia	Quaternary Science Reviews	27:1784-1788	m	A	Tight Entrance Cave
4969	-34.0667	115.017	Macropodidae	Metasthenurus	newtonae	TEC07‚Äì1	Sediment	Quartz					135	=	7	1S	135000	7000	OSL					single grain	well	yes	yes	Indirect	yes	WA	2010	Prideaux GJ, GA Gully, AMC Couzens, LK Ayliffe, NR Jankowski, Z Jacobs, RG Roberts, J C Hellstrom, MK Gagan, and LM Hatcher	Timing and dynamics of Late Pleistocene mammal extinctions in southwestern Australia	Proceedings of the National Academy of Sciences of the USA	107(51):22157-22162	m	A	Tight Entrance Cave
4970	-34.0667	115.017	Macropodidae	Metasthenurus	newtonae	TE-FS-UG	Flowstone	Calcite					136.8	=	2.6	1S	136800	2600	U-series Th/U (TIMS)		yes							Indirect	yes	WA	2008	Ayliffe LK, GJ Prideaux, MI Bird, R Gr¬≥n, RG Roberts, GA Gully, R Jones, LK Fifield, RG Cresswell	Age constraints on Pleistocene megafauna at Tight Entrance Cave in southwestern Australia	Quaternary Science Reviews	27:1784-1788	m	A	Tight Entrance Cave
4971	-34.0667	115.017	Macropodidae	Metasthenurus	newtonae	TEC-97	Sediment	Calcite					151	=	7	1S	151000	7000	U-series Th/U (ICP-MS)		yes							Indirect	yes	WA	2010	Prideaux GJ, GA Gully, AMC Couzens, LK Ayliffe, NR Jankowski, Z Jacobs, RG Roberts, J C Hellstrom, MK Gagan, and LM Hatcher	Timing and dynamics of Late Pleistocene mammal extinctions in southwestern Australia	Proceedings of the National Academy of Sciences of the USA	107(51):22157-22162	m	A	Tight Entrance Cave
4972	-37.0472	140.804	Macropodidae	Metasthenurus	newtonae	19	Sediment	Quartz					164	=	15	1S	164000	15000	OSL					single aliquot	well	yes	yes	Indirect	yes	SA	2001	Roberts RG, TF Flannery, LK Ayliffe, H Yoshida, JM Olley, GM Prideaux, GM Laslett, A Baynes, MA Smith, R Jones, BL Smith Hiroyuki Yoshida,1 Jon M. Olley,4 Gavin J. Prideaux,5 Geoff M. Laslett,6 Alexander Baynes,7 M. A. Smith,8 Rhys Jones,9 Barton L. Smit	New ages for the last Australian megafauna: continent-wide extinction about 46,000 years ago	Science	292:1888-1892	m	A	Victoria Fossil Cave
4973	-37.0333	140.8	Macropodidae	Metasthenurus	newtonae	NC3	Sediment	Quartz					257	=	21	2S	257000	21000	OSL					single aliquot	well	yes	yes	Indirect	yes	SA	2007	Prideaux GJ, RG Roberts, D Megirian, KE Westaway, JC Hellstrom, JM Olley	Mammalian responses to Pleistocene climate change in southeastern Australia	Geology	35(1):33-36	m	A	Cathedral Cave
4975	-37.0333	140.8	Macropodidae	Metasthenurus	newtonae	NC4	Sediment	Quartz					292	=	19	2S	292000	19000	OSL					single aliquot	well	yes	yes	Indirect	yes	SA	2007	Prideaux GJ, RG Roberts, D Megirian, KE Westaway, JC Hellstrom, JM Olley	Mammalian responses to Pleistocene climate change in southeastern Australia	Geology	35(1):33-36	m	A	Cathedral Cave
4976	-37.0333	140.8	Macropodidae	Metasthenurus	newtonae	NCF1-3 mid	Flowstone	Calcite					297	=	9	2S	297000	9000	U-series Th/U (ICP-MS)	yes	yes							Indirect	yes	SA	2007	Prideaux GJ, RG Roberts, D Megirian, KE Westaway, JC Hellstrom, JM Olley	Mammalian responses to Pleistocene climate change in southeastern Australia	Geology	35(1):33-36	m	A	Cathedral Cave
4978	-37.0333	140.8	Macropodidae	Metasthenurus	newtonae	NC5	Sediment	Quartz					513	=	73	2S	513000	73000	OSL					single aliquot	well	yes	yes	Indirect	yes	SA	2007	Prideaux GJ, RG Roberts, D Megirian, KE Westaway, JC Hellstrom, JM Olley	Mammalian responses to Pleistocene climate change in southeastern Australia	Geology	35(1):33-36	m	A	Cathedral Cave
4979	-37.0333	140.8	Macropodidae	Metasthenurus	newtonae	NC6	Sediment	Quartz					535	=	49	2S	535000	49000	OSL					single aliquot	well	yes	yes	Indirect	yes	SA	2007	Prideaux GJ, RG Roberts, D Megirian, KE Westaway, JC Hellstrom, JM Olley	Mammalian responses to Pleistocene climate change in southeastern Australia	Geology	35(1):33-36	m	A	Cathedral Cave
5169	-40.8	145.13	Palorchestidae	Palorchestes	azael	ST-1	Sediment	Quartz					56	=	4	1S	56000	4000	OSL					multi aliquot	well	yes	yes	Indirect	yes	TAS	2008	Turney CSM, Flannery TF, Roberts RG	Late-surviving megafauna in Tasmania, Australia, implicate human involvement in their extinction	Proceedings of the National Academy of Sciences of the USA	105(34):12150-12153	m	A	Scotchtown Cave
5171	-27.95	151.733	Palorchestidae	Palorchestes	azael	Ris√∏-060702	Sediment	Quartz					122	=	22	2S	122000	22000	OSL					single aliquot	well	yes	yes	Indirect	yes	QLD	2011	Price GJ, Webb GE, Zhao J-X, Feng Y-X, Murray AS Bernard N. Cooke b, Scott A. Hocknull e, Ian H. Sobbe	Dating megafaunal extinction on the Pleistocene Darling Downs, eastern Australia: the promise and pitfalls of dating as a test of extinction hypotheses	Quaternary Science Reviews	30:899-914	m	A	QML796
5172	-37.0472	140.804	Palorchestidae	Palorchestes	azael	19	Sediment	Quartz					164	=	15	1S	164000	15000	OSL					single aliquot	well	yes	yes	Indirect	yes	SA	2001	Roberts RG, TF Flannery, LK Ayliffe, H Yoshida, JM Olley, GM Prideaux, GM Laslett, A Baynes, MA Smith, R Jones, BL Smith Hiroyuki Yoshida,1 Jon M. Olley,4 Gavin J. Prideaux,5 Geoff M. Laslett,6 Alexander Baynes,7 M. A. Smith,8 Rhys Jones,9 Barton L. Smit	New ages for the last Australian megafauna: continent-wide extinction about 46,000 years ago	Science	292:1888-1892	m	A	Victoria Fossil Cave
5174	-37.0333	140.8	Palorchestidae	Palorchestes	azael	NC3	Sediment	Quartz					257	=	21	2S	257000	21000	OSL					single aliquot	well	yes	yes	Indirect	yes	SA	2007	Prideaux GJ, RG Roberts, D Megirian, KE Westaway, JC Hellstrom, JM Olley	Mammalian responses to Pleistocene climate change in southeastern Australia	Geology	35(1):33-36	m	A	Cathedral Cave
5217	-27.95	151.733	Palorchestidae	Palorchestes	species indet.	Ris√∏-060702	Sediment	Quartz					122	=	22	2S	122000	22000	OSL					single aliquot	well	yes	yes	Indirect	yes	QLD	2011	Price GJ, Webb GE, Zhao J-X, Feng Y-X, Murray AS Bernard N. Cooke b, Scott A. Hocknull e, Ian H. Sobbe	Dating megafaunal extinction on the Pleistocene Darling Downs, eastern Australia: the promise and pitfalls of dating as a test of extinction hypotheses	Quaternary Science Reviews	30:899-914	m	A	QML796
6015	-27.9167	151.967	Vombatidae	Phascolonus	gigas	1	Sediment	Quartz					46	=	6	1S	46000	6000	OSL					single aliquot	well	yes	yes	Indirect	yes	QLD	2001	Roberts RG, TF Flannery, LK Ayliffe, H Yoshida, JM Olley, GM Prideaux, GM Laslett, A Baynes, MA Smith, R Jones, BL Smith Hiroyuki Yoshida,1 Jon M. Olley,4 Gavin J. Prideaux,5 Geoff M. Laslett,6 Alexander Baynes,7 M. A. Smith,8 Rhys Jones,9 Barton L. Smit	New ages for the last Australian megafauna: continent-wide extinction about 46,000 years ago	Science	292:1888-1892	m	A	Ned's Gully
6016	-27.9167	151.967	Vombatidae	Phascolonus	gigas	1	Sediment	Quartz					47	=	6	1S	47000	6000	OSL					single aliquot	well	yes	yes	Indirect	yes	QLD	2001	Roberts RG, TF Flannery, LK Ayliffe, H Yoshida, JM Olley, GM Prideaux, GM Laslett, A Baynes, MA Smith, R Jones, BL Smith Hiroyuki Yoshida,1 Jon M. Olley,4 Gavin J. Prideaux,5 Geoff M. Laslett,6 Alexander Baynes,7 M. A. Smith,8 Rhys Jones,9 Barton L. Smit	New ages for the last Australian megafauna: continent-wide extinction about 46,000 years ago	Science	292:1888-1892	m	A	Ned's Gully
6017	-34.02	141.342	Vombatidae	Phascolonus	gigas	9 & 10	Sediment	Quartz					52	=	8	1S	52000	8000	OSL					single aliquot	well	yes	yes	Indirect	yes	NSW	2001	Roberts RG, TF Flannery, LK Ayliffe, H Yoshida, JM Olley, GM Prideaux, GM Laslett, A Baynes, MA Smith, R Jones, BL Smith Hiroyuki Yoshida,1 Jon M. Olley,4 Gavin J. Prideaux,5 Geoff M. Laslett,6 Alexander Baynes,7 M. A. Smith,8 Rhys Jones,9 Barton L. Smit	New ages for the last Australian megafauna: continent-wide extinction about 46,000 years ago	Science	292:1888-1892	m	A	Lake Victoria
6018	-34.02	141.342	Vombatidae	Phascolonus	gigas	10	Sediment	Quartz					54	=	7	1S	54000	7000	OSL					single aliquot	well	yes	yes	Indirect	yes	NSW	2001	Roberts RG, TF Flannery, LK Ayliffe, H Yoshida, JM Olley, GM Prideaux, GM Laslett, A Baynes, MA Smith, R Jones, BL Smith Hiroyuki Yoshida,1 Jon M. Olley,4 Gavin J. Prideaux,5 Geoff M. Laslett,6 Alexander Baynes,7 M. A. Smith,8 Rhys Jones,9 Barton L. Smit	New ages for the last Australian megafauna: continent-wide extinction about 46,000 years ago	Science	292:1888-1892	m	A	Lake Victoria
6019	-38.1881	143.28	Vombatidae	Phascolonus	gigas	15	Sediment	Quartz					70	=	8	1S	70000	8000	OSL					single aliquot	well	yes	yes	Indirect	yes	VIC	2001	Roberts RG, TF Flannery, LK Ayliffe, H Yoshida, JM Olley, GM Prideaux, GM Laslett, A Baynes, MA Smith, R Jones, BL Smith Hiroyuki Yoshida,1 Jon M. Olley,4 Gavin J. Prideaux,5 Geoff M. Laslett,6 Alexander Baynes,7 M. A. Smith,8 Rhys Jones,9 Barton L. Smit	New ages for the last Australian megafauna: continent-wide extinction about 46,000 years ago	Science	292:1888-1892	m	A	Lake Weeranganuk
6020	-29.8	140.167	Vombatidae	Phascolonus	gigas	21	Sediment	Quartz					75	=	9	1S	75000	9000	OSL					single aliquot	well	yes	yes	Indirect	yes	SA	2001	Roberts RG, TF Flannery, LK Ayliffe, H Yoshida, JM Olley, GM Prideaux, GM Laslett, A Baynes, MA Smith, R Jones, BL Smith Hiroyuki Yoshida,1 Jon M. Olley,4 Gavin J. Prideaux,5 Geoff M. Laslett,6 Alexander Baynes,7 M. A. Smith,8 Rhys Jones,9 Barton L. Smit	New ages for the last Australian megafauna: continent-wide extinction about 46,000 years ago	Science	292:1888-1892	m	A	Lake Callabonna
6021	-34.02	141.342	Vombatidae	Phascolonus	gigas	11	Sediment	Quartz					97	=	11	1S	97000	11000	OSL					single aliquot	well	yes	yes	Indirect	yes	NSW	2001	Roberts RG, TF Flannery, LK Ayliffe, H Yoshida, JM Olley, GM Prideaux, GM Laslett, A Baynes, MA Smith, R Jones, BL Smith Hiroyuki Yoshida,1 Jon M. Olley,4 Gavin J. Prideaux,5 Geoff M. Laslett,6 Alexander Baynes,7 M. A. Smith,8 Rhys Jones,9 Barton L. Smit	New ages for the last Australian megafauna: continent-wide extinction about 46,000 years ago	Science	292:1888-1892	m	A	Lake Victoria
6022	-27.95	151.733	Vombatidae	Phascolonus	gigas	Ris√∏-060702	Sediment	Quartz					122	=	22	2S	122000	22000	OSL					single aliquot	well	yes	yes	Indirect	yes	QLD	2011	Price GJ, Webb GE, Zhao J-X, Feng Y-X, Murray AS Bernard N. Cooke b, Scott A. Hocknull e, Ian H. Sobbe	Dating megafaunal extinction on the Pleistocene Darling Downs, eastern Australia: the promise and pitfalls of dating as a test of extinction hypotheses	Quaternary Science Reviews	30:899-914	m	A	QML796
6270	-34.0667	115.017	Macropodidae	Procoptodon	browneorum	ANUA-13410	Sediment	Charcoal	ABOX-SC	ABOX	no	no	43	=	2.7	1S	46599	1853	Radiocarbon (ABOX)									Indirect	yes	WA	2008	Ayliffe LK, GJ Prideaux, MI Bird, R Gr¬≥n, RG Roberts, GA Gully, R Jones, LK Fifield, RG Cresswell	Age constraints on Pleistocene megafauna at Tight Entrance Cave in southwestern Australia	Quaternary Science Reviews	27:1784-1788	m	A	Tight Entrance Cave
6271	-34.0667	115.017	Macropodidae	Procoptodon	browneorum	TEC-F (WAM 07.6.147)	Sediment	Calcite					44.9	=	1.3	1S	44900	1300	U-series Th/U (ICP-MS)		yes							Indirect	yes	WA	2010	Prideaux GJ, GA Gully, AMC Couzens, LK Ayliffe, NR Jankowski, Z Jacobs, RG Roberts, J C Hellstrom, MK Gagan, and LM Hatcher	Timing and dynamics of Late Pleistocene mammal extinctions in southwestern Australia	Proceedings of the National Academy of Sciences of the USA	107(51):22157-22162	m	A	Tight Entrance Cave
6272	-34.0667	115.017	Macropodidae	Procoptodon	browneorum	ANUA-11702	Sediment	Charcoal	ABOX-SC	ABOX	no	no	45.2	=	1.5	1S	48185	1094	Radiocarbon (ABOX)									Indirect	yes	WA	2008	Ayliffe LK, GJ Prideaux, MI Bird, R Gr¬≥n, RG Roberts, GA Gully, R Jones, LK Fifield, RG Cresswell	Age constraints on Pleistocene megafauna at Tight Entrance Cave in southwestern Australia	Quaternary Science Reviews	27:1784-1788	m	A	Tight Entrance Cave
6273	-34.052	115.026	Macropodidae	Procoptodon	browneorum	23	Sediment	Quartz					46	=	6	1S	46000	6000	OSL					single aliquot	well	yes	yes	Indirect	yes	WA	2001	Roberts RG, TF Flannery, LK Ayliffe, H Yoshida, JM Olley, GM Prideaux, GM Laslett, A Baynes, MA Smith, R Jones, BL Smith Hiroyuki Yoshida,1 Jon M. Olley,4 Gavin J. Prideaux,5 Geoff M. Laslett,6 Alexander Baynes,7 M. A. Smith,8 Rhys Jones,9 Barton L. Smit	New ages for the last Australian megafauna: continent-wide extinction about 46,000 years ago	Science	292:1888-1892	m	A	Kudjal Yolgah Cave
6274	-34.052	115.026	Macropodidae	Procoptodon	browneorum	23	Sediment	Quartz					46	=	2	1S	46000	2000	OSL					single aliquot	well	yes	yes	Indirect	yes	WA	2001	Roberts RG, TF Flannery, LK Ayliffe, H Yoshida, JM Olley, GM Prideaux, GM Laslett, A Baynes, MA Smith, R Jones, BL Smith Hiroyuki Yoshida,1 Jon M. Olley,4 Gavin J. Prideaux,5 Geoff M. Laslett,6 Alexander Baynes,7 M. A. Smith,8 Rhys Jones,9 Barton L. Smit	New ages for the last Australian megafauna: continent-wide extinction about 46,000 years ago	Science	292:1888-1892	m	A	Kudjal Yolgah Cave
6276	-34.0667	115.017	Macropodidae	Procoptodon	browneorum	TEC-F (unit G lower)	Sediment	Calcite					48.7	=	3	1S	48700	3000	U-series Th/U (ICP-MS)		yes							Indirect	yes	WA	2010	Prideaux GJ, GA Gully, AMC Couzens, LK Ayliffe, NR Jankowski, Z Jacobs, RG Roberts, J C Hellstrom, MK Gagan, and LM Hatcher	Timing and dynamics of Late Pleistocene mammal extinctions in southwestern Australia	Proceedings of the National Academy of Sciences of the USA	107(51):22157-22162	m	A	Tight Entrance Cave
6279	-34.0667	115.02	Macropodidae	Procoptodon	browneorum	24	Sediment	Quartz					63	=	9	1S	63000	9000	OSL					single aliquot	well	yes	yes	Indirect	yes	WA	2001	Roberts RG, TF Flannery, LK Ayliffe, H Yoshida, JM Olley, GM Prideaux, GM Laslett, A Baynes, MA Smith, R Jones, BL Smith Hiroyuki Yoshida,1 Jon M. Olley,4 Gavin J. Prideaux,5 Geoff M. Laslett,6 Alexander Baynes,7 M. A. Smith,8 Rhys Jones,9 Barton L. Smit	New ages for the last Australian megafauna: continent-wide extinction about 46,000 years ago	Science	292:1888-1892	m	A	Mammoth Cave
6280	-34.0667	115.017	Macropodidae	Procoptodon	browneorum	TEC‚ÄìF	Sediment	Quartz					70	=	4	1S	70000	4000	OSL					single grain	partially	yes	no	Indirect	yes	WA	2010	Prideaux GJ, GA Gully, AMC Couzens, LK Ayliffe, NR Jankowski, Z Jacobs, RG Roberts, J C Hellstrom, MK Gagan, and LM Hatcher	Timing and dynamics of Late Pleistocene mammal extinctions in southwestern Australia	Proceedings of the National Academy of Sciences of the USA	107(51):22157-22162	m	A	Tight Entrance Cave
6281	-34.0667	115.02	Macropodidae	Procoptodon	browneorum	24	Sediment	Sediment					74	=	10	1S	74000	10000	OSL					single aliquot	well	yes	yes	Indirect	yes	WA	2001	Roberts RG, TF Flannery, LK Ayliffe, H Yoshida, JM Olley, GM Prideaux, GM Laslett, A Baynes, MA Smith, R Jones, BL Smith Hiroyuki Yoshida,1 Jon M. Olley,4 Gavin J. Prideaux,5 Geoff M. Laslett,6 Alexander Baynes,7 M. A. Smith,8 Rhys Jones,9 Barton L. Smit	New ages for the last Australian megafauna: continent-wide extinction about 46,000 years ago	Science	292:1888-1892	m	A	Mammoth Cave
6282	-37.0472	140.804	Macropodidae	Procoptodon	browneorum	GH09-4	Sediment	Quartz					77	=	6	2S	77000	6000	OSL					single grain	partially	yes	no	Indirect	yes	SA	2012	Macken AC, GJ Prideaux, EH Reed	Variation and pattern in the responses of mammal faunas to Late Pleistocene climatic change in southeastern South Australia	Journal of Quaternary Science	27(4):415-424	m	A	Victoria Fossil Cave
6283	-34.0667	115.017	Macropodidae	Procoptodon	browneorum	TEC-F	Sediment	Calcite					112	=	11	1S	112000	11000	U-series Th/U (ICP-MS)		yes							Indirect	yes	WA	2010	Prideaux GJ, GA Gully, AMC Couzens, LK Ayliffe, NR Jankowski, Z Jacobs, RG Roberts, J C Hellstrom, MK Gagan, and LM Hatcher	Timing and dynamics of Late Pleistocene mammal extinctions in southwestern Australia	Proceedings of the National Academy of Sciences of the USA	107(51):22157-22162	m	A	Tight Entrance Cave
6284	-34.2725	115.096	Macropodidae	Procoptodon	browneorum	25	Sediment	Quartz					131	=	14	1S	131000	14000	OSL					single aliquot	well	yes	yes	Indirect	yes	WA	2001	Roberts RG, TF Flannery, LK Ayliffe, H Yoshida, JM Olley, GM Prideaux, GM Laslett, A Baynes, MA Smith, R Jones, BL Smith Hiroyuki Yoshida,1 Jon M. Olley,4 Gavin J. Prideaux,5 Geoff M. Laslett,6 Alexander Baynes,7 M. A. Smith,8 Rhys Jones,9 Barton L. Smit	New ages for the last Australian megafauna: continent-wide extinction about 46,000 years ago	Science	292:1888-1892	m	A	Moondyne Cave
6285	-34.0667	115.017	Macropodidae	Procoptodon	browneorum	TEC07‚Äì1	Sediment	Quartz					135	=	7	1S	135000	7000	OSL					single grain	well	yes	yes	Indirect	yes	WA	2010	Prideaux GJ, GA Gully, AMC Couzens, LK Ayliffe, NR Jankowski, Z Jacobs, RG Roberts, J C Hellstrom, MK Gagan, and LM Hatcher	Timing and dynamics of Late Pleistocene mammal extinctions in southwestern Australia	Proceedings of the National Academy of Sciences of the USA	107(51):22157-22162	m	A	Tight Entrance Cave
6287	-34.0667	115.017	Macropodidae	Procoptodon	browneorum	TEC-97	Sediment	Calcite					151	=	7	1S	151000	7000	U-series Th/U (ICP-MS)		yes							Indirect	yes	WA	2010	Prideaux GJ, GA Gully, AMC Couzens, LK Ayliffe, NR Jankowski, Z Jacobs, RG Roberts, J C Hellstrom, MK Gagan, and LM Hatcher	Timing and dynamics of Late Pleistocene mammal extinctions in southwestern Australia	Proceedings of the National Academy of Sciences of the USA	107(51):22157-22162	m	A	Tight Entrance Cave
6288	-37.0472	140.804	Macropodidae	Procoptodon	browneorum	19	Sediment	Quartz					164	=	15	1S	164000	15000	OSL					single aliquot	well	yes	yes	Indirect	yes	SA	2001	Roberts RG, TF Flannery, LK Ayliffe, H Yoshida, JM Olley, GM Prideaux, GM Laslett, A Baynes, MA Smith, R Jones, BL Smith Hiroyuki Yoshida,1 Jon M. Olley,4 Gavin J. Prideaux,5 Geoff M. Laslett,6 Alexander Baynes,7 M. A. Smith,8 Rhys Jones,9 Barton L. Smit	New ages for the last Australian megafauna: continent-wide extinction about 46,000 years ago	Science	292:1888-1892	m	A	Victoria Fossil Cave
6289	-37.0333	140.8	Macropodidae	Procoptodon	browneorum	NC3	Sediment	Quartz					257	=	21	2S	257000	21000	OSL					single aliquot	well	yes	yes	Indirect	yes	SA	2007	Prideaux GJ, RG Roberts, D Megirian, KE Westaway, JC Hellstrom, JM Olley	Mammalian responses to Pleistocene climate change in southeastern Australia	Geology	35(1):33-36	m	A	Cathedral Cave
6292	-37.0333	140.8	Macropodidae	Procoptodon	browneorum	NC4	Sediment	Quartz					292	=	19	2S	292000	19000	OSL					single aliquot	well	yes	yes	Indirect	yes	SA	2007	Prideaux GJ, RG Roberts, D Megirian, KE Westaway, JC Hellstrom, JM Olley	Mammalian responses to Pleistocene climate change in southeastern Australia	Geology	35(1):33-36	m	A	Cathedral Cave
6293	-37.0333	140.8	Macropodidae	Procoptodon	browneorum	NCF1-3 mid	Flowstone	Calcite					297	=	9	2S	297000	9000	U-series Th/U (ICP-MS)	yes	yes							Indirect	yes	SA	2007	Prideaux GJ, RG Roberts, D Megirian, KE Westaway, JC Hellstrom, JM Olley	Mammalian responses to Pleistocene climate change in southeastern Australia	Geology	35(1):33-36	m	A	Cathedral Cave
6294	-37.0333	140.8	Macropodidae	Procoptodon	browneorum	NCF1-1 base	Flowstone	Calcite					396	=	19	2S	396000	19000	U-series Th/U (ICP-MS)	yes	yes							Indirect	yes	SA	2007	Prideaux GJ, RG Roberts, D Megirian, KE Westaway, JC Hellstrom, JM Olley	Mammalian responses to Pleistocene climate change in southeastern Australia	Geology	35(1):33-36	m	A	Cathedral Cave
6295	-37.0333	140.8	Macropodidae	Procoptodon	browneorum	NC5	Sediment	Quartz					513	=	73	2S	513000	73000	OSL					single aliquot	well	yes	yes	Indirect	yes	SA	2007	Prideaux GJ, RG Roberts, D Megirian, KE Westaway, JC Hellstrom, JM Olley	Mammalian responses to Pleistocene climate change in southeastern Australia	Geology	35(1):33-36	m	A	Cathedral Cave
6296	-37.0333	140.8	Macropodidae	Procoptodon	browneorum	NC6	Sediment	Quartz					535	=	49	2S	535000	49000	OSL					single aliquot	well	yes	yes	Indirect	yes	SA	2007	Prideaux GJ, RG Roberts, D Megirian, KE Westaway, JC Hellstrom, JM Olley	Mammalian responses to Pleistocene climate change in southeastern Australia	Geology	35(1):33-36	m	A	Cathedral Cave
6337	-37.0472	140.804	Macropodidae	Procoptodon	gilli	GH09-2	Sediment	Quartz					70	=	6	2S	70000	6000	OSL					single grain	partially	yes	no	Indirect	yes	SA	2012	Macken AC, GJ Prideaux, EH Reed	Variation and pattern in the responses of mammal faunas to Late Pleistocene climatic change in southeastern South Australia	Journal of Quaternary Science	27(4):415-424	m	A	Victoria Fossil Cave
6338	-37.0472	140.804	Macropodidae	Procoptodon	gilli	GH09-5	Sediment	Quartz					76	=	6	2S	76000	6000	OSL					single grain	partially	yes	no	Indirect	yes	SA	2012	Macken AC, GJ Prideaux, EH Reed	Variation and pattern in the responses of mammal faunas to Late Pleistocene climatic change in southeastern South Australia	Journal of Quaternary Science	27(4):415-424	m	A	Victoria Fossil Cave
6339	-37.0472	140.804	Macropodidae	Procoptodon	gilli	GH09-4	Sediment	Quartz					77	=	6	2S	77000	6000	OSL					single grain	partially	yes	no	Indirect	yes	SA	2012	Macken AC, GJ Prideaux, EH Reed	Variation and pattern in the responses of mammal faunas to Late Pleistocene climatic change in southeastern South Australia	Journal of Quaternary Science	27(4):415-424	m	A	Victoria Fossil Cave
6340	-37.0472	140.804	Macropodidae	Procoptodon	gilli	GH09-1	Sediment	Quartz					82	=	6	2S	82000	6000	OSL					single grain	partially	yes	no	Indirect	yes	SA	2012	Macken AC, GJ Prideaux, EH Reed	Variation and pattern in the responses of mammal faunas to Late Pleistocene climatic change in southeastern South Australia	Journal of Quaternary Science	27(4):415-424	m	A	Victoria Fossil Cave
6341	-37.0472	140.804	Macropodidae	Procoptodon	gilli	GH09-3	Sediment	Quartz					82	=	8	2S	82000	8000	OSL					single grain	partially	yes	no	Indirect	yes	SA	2012	Macken AC, GJ Prideaux, EH Reed	Variation and pattern in the responses of mammal faunas to Late Pleistocene climatic change in southeastern South Australia	Journal of Quaternary Science	27(4):415-424	m	A	Victoria Fossil Cave
6343	-37.0472	140.804	Macropodidae	Procoptodon	gilli	19	Sediment	Quartz					164	=	15	1S	164000	15000	OSL					single aliquot	well	yes	yes	Indirect	yes	SA	2001	Roberts RG, TF Flannery, LK Ayliffe, H Yoshida, JM Olley, GM Prideaux, GM Laslett, A Baynes, MA Smith, R Jones, BL Smith Hiroyuki Yoshida,1 Jon M. Olley,4 Gavin J. Prideaux,5 Geoff M. Laslett,6 Alexander Baynes,7 M. A. Smith,8 Rhys Jones,9 Barton L. Smit	New ages for the last Australian megafauna: continent-wide extinction about 46,000 years ago	Science	292:1888-1892	m	A	Victoria Fossil Cave
6344	-37.0333	140.8	Macropodidae	Procoptodon	gilli	NC1	Sediment	Quartz					206	=	16	2S	206000	16000	OSL					single aliquot	well	yes	yes	Indirect	yes	SA	2007	Prideaux GJ, RG Roberts, D Megirian, KE Westaway, JC Hellstrom, JM Olley	Mammalian responses to Pleistocene climate change in southeastern Australia	Geology	35(1):33-36	m	A	Cathedral Cave
6345	-37.0333	140.8	Macropodidae	Procoptodon	gilli	NC2	Sediment	Quartz					231	=	21	2S	231000	21000	OSL					single aliquot	well	yes	yes	Indirect	yes	SA	2007	Prideaux GJ, RG Roberts, D Megirian, KE Westaway, JC Hellstrom, JM Olley	Mammalian responses to Pleistocene climate change in southeastern Australia	Geology	35(1):33-36	m	A	Cathedral Cave
6346	-37.0333	140.8	Macropodidae	Procoptodon	gilli	NC3	Sediment	Quartz					257	=	21	2S	257000	21000	OSL					single aliquot	well	yes	yes	Indirect	yes	SA	2007	Prideaux GJ, RG Roberts, D Megirian, KE Westaway, JC Hellstrom, JM Olley	Mammalian responses to Pleistocene climate change in southeastern Australia	Geology	35(1):33-36	m	A	Cathedral Cave
6349	-37.0333	140.8	Macropodidae	Procoptodon	gilli	NC4	Sediment	Quartz					292	=	19	2S	292000	19000	OSL					single aliquot	well	yes	yes	Indirect	yes	SA	2007	Prideaux GJ, RG Roberts, D Megirian, KE Westaway, JC Hellstrom, JM Olley	Mammalian responses to Pleistocene climate change in southeastern Australia	Geology	35(1):33-36	m	A	Cathedral Cave
6350	-37.0333	140.8	Macropodidae	Procoptodon	gilli	NCF1-3 mid	Flowstone	Calcite					297	=	9	2S	297000	9000	U-series Th/U (ICP-MS)	yes	yes							Indirect	yes	SA	2007	Prideaux GJ, RG Roberts, D Megirian, KE Westaway, JC Hellstrom, JM Olley	Mammalian responses to Pleistocene climate change in southeastern Australia	Geology	35(1):33-36	m	A	Cathedral Cave
6351	-37.0333	140.8	Macropodidae	Procoptodon	gilli	NCF1-1 base	Flowstone	Calcite					396	=	19	2S	396000	19000	U-series Th/U (ICP-MS)	yes	yes							Indirect	yes	SA	2007	Prideaux GJ, RG Roberts, D Megirian, KE Westaway, JC Hellstrom, JM Olley	Mammalian responses to Pleistocene climate change in southeastern Australia	Geology	35(1):33-36	m	A	Cathedral Cave
6352	-37.0333	140.8	Macropodidae	Procoptodon	gilli	NC5	Sediment	Quartz					513	=	73	2S	513000	73000	OSL					single aliquot	well	yes	yes	Indirect	yes	SA	2007	Prideaux GJ, RG Roberts, D Megirian, KE Westaway, JC Hellstrom, JM Olley	Mammalian responses to Pleistocene climate change in southeastern Australia	Geology	35(1):33-36	m	A	Cathedral Cave
6353	-37.0333	140.8	Macropodidae	Procoptodon	gilli	NC6	Sediment	Quartz					535	=	49	2S	535000	49000	OSL					single aliquot	well	yes	yes	Indirect	yes	SA	2007	Prideaux GJ, RG Roberts, D Megirian, KE Westaway, JC Hellstrom, JM Olley	Mammalian responses to Pleistocene climate change in southeastern Australia	Geology	35(1):33-36	m	A	Cathedral Cave
6354	-35.9495	136.735	Macropodidae	Procoptodon	gilli	2120A	Tooth	Enamel					41	=	5	1S	41000	5000	CSUS-ESR									Direct		SA	2008	Gr√ºn R, Wells R, Eggins S, Spooner N, Aubert M, Brown L, Rhodes E	Electron spin resonance dating of South Australian megafauna sites	Australian Journal of Earth Sciences	55:917-935	m*	A*	Black Creek Swamp
6355	-35.9495	136.735	Macropodidae	Procoptodon	gilli	2121	Tooth	Enamel					46	=	5.5	1S	46000	5500	CSUS-ESR									Direct		SA	2008	Gr√ºn R, Wells R, Eggins S, Spooner N, Aubert M, Brown L, Rhodes E	Electron spin resonance dating of South Australian megafauna sites	Australian Journal of Earth Sciences	55:917-935	m*	A*	Black Creek Swamp
6387	-27.9167	151.967	Macropodidae	Procoptodon	goliah	1	Sediment	Quartz					46	=	6	1S	46000	6000	OSL					single aliquot	well	yes	yes	Indirect	yes	QLD	2001	Roberts RG, TF Flannery, LK Ayliffe, H Yoshida, JM Olley, GM Prideaux, GM Laslett, A Baynes, MA Smith, R Jones, BL Smith Hiroyuki Yoshida,1 Jon M. Olley,4 Gavin J. Prideaux,5 Geoff M. Laslett,6 Alexander Baynes,7 M. A. Smith,8 Rhys Jones,9 Barton L. Smit	New ages for the last Australian megafauna: continent-wide extinction about 46,000 years ago	Science	292:1888-1892	m	A	Ned's Gully
6388	-27.9167	151.967	Macropodidae	Procoptodon	goliah	1	Sediment	Quartz					47	=	6	1S	47000	6000	OSL					single aliquot	well	yes	yes	Indirect	yes	QLD	2001	Roberts RG, TF Flannery, LK Ayliffe, H Yoshida, JM Olley, GM Prideaux, GM Laslett, A Baynes, MA Smith, R Jones, BL Smith Hiroyuki Yoshida,1 Jon M. Olley,4 Gavin J. Prideaux,5 Geoff M. Laslett,6 Alexander Baynes,7 M. A. Smith,8 Rhys Jones,9 Barton L. Smit	New ages for the last Australian megafauna: continent-wide extinction about 46,000 years ago	Science	292:1888-1892	m	A	Ned's Gully
6389	-34.02	141.342	Macropodidae	Procoptodon	goliah	9 & 10	Sediment	Quartz					52	=	8	1S	52000	8000	OSL					single aliquot	well	yes	yes	Indirect	yes	NSW	2001	Roberts RG, TF Flannery, LK Ayliffe, H Yoshida, JM Olley, GM Prideaux, GM Laslett, A Baynes, MA Smith, R Jones, BL Smith Hiroyuki Yoshida,1 Jon M. Olley,4 Gavin J. Prideaux,5 Geoff M. Laslett,6 Alexander Baynes,7 M. A. Smith,8 Rhys Jones,9 Barton L. Smit	New ages for the last Australian megafauna: continent-wide extinction about 46,000 years ago	Science	292:1888-1892	m	A	Lake Victoria
6390	-34.02	141.342	Macropodidae	Procoptodon	goliah	10	Sediment	Quartz					54	=	7	1S	54000	7000	OSL					single aliquot	well	yes	yes	Indirect	yes	NSW	2001	Roberts RG, TF Flannery, LK Ayliffe, H Yoshida, JM Olley, GM Prideaux, GM Laslett, A Baynes, MA Smith, R Jones, BL Smith Hiroyuki Yoshida,1 Jon M. Olley,4 Gavin J. Prideaux,5 Geoff M. Laslett,6 Alexander Baynes,7 M. A. Smith,8 Rhys Jones,9 Barton L. Smit	New ages for the last Australian megafauna: continent-wide extinction about 46,000 years ago	Science	292:1888-1892	m	A	Lake Victoria
6391	-32.34	142.34	Macropodidae	Procoptodon	goliah	7	Sediment	Quartz					67	=	6	1S	67000	6000	OSL					single aliquot	well	yes	yes	Indirect	yes	NSW	2001	Roberts RG, TF Flannery, LK Ayliffe, H Yoshida, JM Olley, GM Prideaux, GM Laslett, A Baynes, MA Smith, R Jones, BL Smith Hiroyuki Yoshida,1 Jon M. Olley,4 Gavin J. Prideaux,5 Geoff M. Laslett,6 Alexander Baynes,7 M. A. Smith,8 Rhys Jones,9 Barton L. Smit	New ages for the last Australian megafauna: continent-wide extinction about 46,000 years ago	Science	292:1888-1892	m	A	Lake Menindee
6392	-34.02	141.342	Macropodidae	Procoptodon	goliah	11	Sediment	Quartz					97	=	11	1S	97000	11000	OSL					single aliquot	well	yes	yes	Indirect	yes	NSW	2001	Roberts RG, TF Flannery, LK Ayliffe, H Yoshida, JM Olley, GM Prideaux, GM Laslett, A Baynes, MA Smith, R Jones, BL Smith Hiroyuki Yoshida,1 Jon M. Olley,4 Gavin J. Prideaux,5 Geoff M. Laslett,6 Alexander Baynes,7 M. A. Smith,8 Rhys Jones,9 Barton L. Smit	New ages for the last Australian megafauna: continent-wide extinction about 46,000 years ago	Science	292:1888-1892	m	A	Lake Victoria
6393	-37.0472	140.804	Macropodidae	Procoptodon	goliah	19	Sediment	Quartz					164	=	15	1S	164000	15000	OSL					single aliquot	well	yes	yes	Indirect	yes	SA	2001	Roberts RG, TF Flannery, LK Ayliffe, H Yoshida, JM Olley, GM Prideaux, GM Laslett, A Baynes, MA Smith, R Jones, BL Smith Hiroyuki Yoshida,1 Jon M. Olley,4 Gavin J. Prideaux,5 Geoff M. Laslett,6 Alexander Baynes,7 M. A. Smith,8 Rhys Jones,9 Barton L. Smit	New ages for the last Australian megafauna: continent-wide extinction about 46,000 years ago	Science	292:1888-1892	m	A	Victoria Fossil Cave
6394	-37.0333	140.8	Macropodidae	Procoptodon	goliah	NC1	Sediment	Quartz					206	=	16	2S	206000	16000	OSL					single aliquot	well	yes	yes	Indirect	yes	SA	2007	Prideaux GJ, RG Roberts, D Megirian, KE Westaway, JC Hellstrom, JM Olley	Mammalian responses to Pleistocene climate change in southeastern Australia	Geology	35(1):33-36	m	A	Cathedral Cave
6395	-37.0333	140.8	Macropodidae	Procoptodon	goliah	NC2	Sediment	Quartz					231	=	21	2S	231000	21000	OSL					single aliquot	well	yes	yes	Indirect	yes	SA	2007	Prideaux GJ, RG Roberts, D Megirian, KE Westaway, JC Hellstrom, JM Olley	Mammalian responses to Pleistocene climate change in southeastern Australia	Geology	35(1):33-36	m	A	Cathedral Cave
6396	-37.0333	140.8	Macropodidae	Procoptodon	goliah	NC3	Sediment	Quartz					257	=	21	2S	257000	21000	OSL					single aliquot	well	yes	yes	Indirect	yes	SA	2007	Prideaux GJ, RG Roberts, D Megirian, KE Westaway, JC Hellstrom, JM Olley	Mammalian responses to Pleistocene climate change in southeastern Australia	Geology	35(1):33-36	m	A	Cathedral Cave
6399	-37.0333	140.8	Macropodidae	Procoptodon	goliah	NC4	Sediment	Quartz					292	=	19	2S	292000	19000	OSL					single aliquot	well	yes	yes	Indirect	yes	SA	2007	Prideaux GJ, RG Roberts, D Megirian, KE Westaway, JC Hellstrom, JM Olley	Mammalian responses to Pleistocene climate change in southeastern Australia	Geology	35(1):33-36	m	A	Cathedral Cave
6400	-37.0333	140.8	Macropodidae	Procoptodon	goliah	NCF1-3 mid	Flowstone	Calcite					297	=	9	2S	297000	9000	U-series Th/U (ICP-MS)	yes	yes							Indirect	yes	SA	2007	Prideaux GJ, RG Roberts, D Megirian, KE Westaway, JC Hellstrom, JM Olley	Mammalian responses to Pleistocene climate change in southeastern Australia	Geology	35(1):33-36	m	A	Cathedral Cave
6424	-38.173	143.163	Macropodidae	Procoptodon	species indet.	16	Sediment	Quartz					82	=	10	1S	82000	10000	OSL					single aliquot	well	yes	yes	Indirect	yes	VIC	2001	Roberts RG, TF Flannery, LK Ayliffe, H Yoshida, JM Olley, GM Prideaux, GM Laslett, A Baynes, MA Smith, R Jones, BL Smith Hiroyuki Yoshida,1 Jon M. Olley,4 Gavin J. Prideaux,5 Geoff M. Laslett,6 Alexander Baynes,7 M. A. Smith,8 Rhys Jones,9 Barton L. Smit	New ages for the last Australian megafauna: continent-wide extinction about 46,000 years ago	Science	292:1888-1892	m	A	Lake Colongulac
6435	-37.0472	140.804	Megapodiidae	Progura	gallinacea	19	Sediment	Quartz					164	=	15	1S	164000	15000	OSL					single aliquot	well	yes	yes	Indirect	yes	SA	2001	Roberts RG, TF Flannery, LK Ayliffe, H Yoshida, JM Olley, GM Prideaux, GM Laslett, A Baynes, MA Smith, R Jones, BL Smith Hiroyuki Yoshida,1 Jon M. Olley,4 Gavin J. Prideaux,5 Geoff M. Laslett,6 Alexander Baynes,7 M. A. Smith,8 Rhys Jones,9 Barton L. Smit	New ages for the last Australian megafauna: continent-wide extinction about 46,000 years ago	Science	292:1888-1892	m	A	Victoria Fossil Cave
6445	-34.02	141.342	Macropodidae	Protemnodon	anak	9 & 10	Sediment	Quartz					52	=	8	1S	52000	8000	OSL					single aliquot	well	yes	yes	Indirect	yes	NSW	2001	Roberts RG, TF Flannery, LK Ayliffe, H Yoshida, JM Olley, GM Prideaux, GM Laslett, A Baynes, MA Smith, R Jones, BL Smith Hiroyuki Yoshida,1 Jon M. Olley,4 Gavin J. Prideaux,5 Geoff M. Laslett,6 Alexander Baynes,7 M. A. Smith,8 Rhys Jones,9 Barton L. Smit	New ages for the last Australian megafauna: continent-wide extinction about 46,000 years ago	Science	292:1888-1892	m	A	Lake Victoria
6446	-34.02	141.342	Macropodidae	Protemnodon	anak	10	Sediment	Quartz					54	=	7	1S	54000	7000	OSL					single aliquot	well	yes	yes	Indirect	yes	NSW	2001	Roberts RG, TF Flannery, LK Ayliffe, H Yoshida, JM Olley, GM Prideaux, GM Laslett, A Baynes, MA Smith, R Jones, BL Smith Hiroyuki Yoshida,1 Jon M. Olley,4 Gavin J. Prideaux,5 Geoff M. Laslett,6 Alexander Baynes,7 M. A. Smith,8 Rhys Jones,9 Barton L. Smit	New ages for the last Australian megafauna: continent-wide extinction about 46,000 years ago	Science	292:1888-1892	m	A	Lake Victoria
6447	-40.8	145.13	Macropodidae	Protemnodon	anak	ST-1	Sediment	Quartz					56	=	4	1S	56000	4000	OSL					multi aliquot	well	yes	yes	Indirect	yes	TAS	2008	Turney CSM, Flannery TF, Roberts RG	Late-surviving megafauna in Tasmania, Australia, implicate human involvement in their extinction	Proceedings of the National Academy of Sciences of the USA	105(34):12150-12153	m	A	Scotchtown Cave
6448	-38.1881	143.28	Macropodidae	Protemnodon	anak	15	Sediment	Quartz					70	=	8	1S	70000	8000	OSL					single aliquot	well	yes	yes	Indirect	yes	VIC	2001	Roberts RG, TF Flannery, LK Ayliffe, H Yoshida, JM Olley, GM Prideaux, GM Laslett, A Baynes, MA Smith, R Jones, BL Smith Hiroyuki Yoshida,1 Jon M. Olley,4 Gavin J. Prideaux,5 Geoff M. Laslett,6 Alexander Baynes,7 M. A. Smith,8 Rhys Jones,9 Barton L. Smit	New ages for the last Australian megafauna: continent-wide extinction about 46,000 years ago	Science	292:1888-1892	m	A	Lake Weeranganuk
6449	-38.173	143.163	Macropodidae	Protemnodon	anak	16	Sediment	Quartz					82	=	10	1S	82000	10000	OSL					single aliquot	well	yes	yes	Indirect	yes	VIC	2001	Roberts RG, TF Flannery, LK Ayliffe, H Yoshida, JM Olley, GM Prideaux, GM Laslett, A Baynes, MA Smith, R Jones, BL Smith Hiroyuki Yoshida,1 Jon M. Olley,4 Gavin J. Prideaux,5 Geoff M. Laslett,6 Alexander Baynes,7 M. A. Smith,8 Rhys Jones,9 Barton L. Smit	New ages for the last Australian megafauna: continent-wide extinction about 46,000 years ago	Science	292:1888-1892	m	A	Lake Colongulac
6450	-27.95	151.733	Macropodidae	Protemnodon	anak	Ris√∏-060701	Sediment	Quartz					107	=	18	2S	107000	18000	OSL					single aliquot	well	yes	yes	Indirect	yes	QLD	2011	Price GJ, Webb GE, Zhao J-X, Feng Y-X, Murray AS Bernard N. Cooke b, Scott A. Hocknull e, Ian H. Sobbe	Dating megafaunal extinction on the Pleistocene Darling Downs, eastern Australia: the promise and pitfalls of dating as a test of extinction hypotheses	Quaternary Science Reviews	30:899-914	m	A	QML796
6451	-27.95	151.733	Macropodidae	Protemnodon	anak	Ris√∏-060703	Sediment	Quartz					112	=	20	2S	112000	20000	OSL					single aliquot	well	yes	yes	Indirect	yes	QLD	2011	Price GJ, Webb GE, Zhao J-X, Feng Y-X, Murray AS Bernard N. Cooke b, Scott A. Hocknull e, Ian H. Sobbe	Dating megafaunal extinction on the Pleistocene Darling Downs, eastern Australia: the promise and pitfalls of dating as a test of extinction hypotheses	Quaternary Science Reviews	30:899-914	m	A	QML796
6452	-27.95	151.733	Macropodidae	Protemnodon	anak	Ris√∏-060702	Sediment	Quartz					122	=	22	2S	122000	22000	OSL					single aliquot	well	yes	yes	Indirect	yes	QLD	2011	Price GJ, Webb GE, Zhao J-X, Feng Y-X, Murray AS Bernard N. Cooke b, Scott A. Hocknull e, Ian H. Sobbe	Dating megafaunal extinction on the Pleistocene Darling Downs, eastern Australia: the promise and pitfalls of dating as a test of extinction hypotheses	Quaternary Science Reviews	30:899-914	m	A	QML796
6462	-35.9495	136.735	Macropodidae	Protemnodon	anak	2122	Tooth	Enamel					87.5	=	11	1S	87500	11000	CSUS-ESR									Direct		SA	2008	Gr√ºn R, Wells R, Eggins S, Spooner N, Aubert M, Brown L, Rhodes E	Electron spin resonance dating of South Australian megafauna sites	Australian Journal of Earth Sciences	55:917-935	m*	A*	Black Creek Swamp
6508	-34.02	141.342	Macropodidae	Protemnodon	brehus	9 & 10	Sediment	Quartz					52	=	8	1S	52000	8000	OSL					single aliquot	well	yes	yes	Indirect	yes	NSW	2001	Roberts RG, TF Flannery, LK Ayliffe, H Yoshida, JM Olley, GM Prideaux, GM Laslett, A Baynes, MA Smith, R Jones, BL Smith Hiroyuki Yoshida,1 Jon M. Olley,4 Gavin J. Prideaux,5 Geoff M. Laslett,6 Alexander Baynes,7 M. A. Smith,8 Rhys Jones,9 Barton L. Smit	New ages for the last Australian megafauna: continent-wide extinction about 46,000 years ago	Science	292:1888-1892	m	A	Lake Victoria
6509	-34.02	141.342	Macropodidae	Protemnodon	brehus	10	Sediment	Quartz					54	=	7	1S	54000	7000	OSL					single aliquot	well	yes	yes	Indirect	yes	NSW	2001	Roberts RG, TF Flannery, LK Ayliffe, H Yoshida, JM Olley, GM Prideaux, GM Laslett, A Baynes, MA Smith, R Jones, BL Smith Hiroyuki Yoshida,1 Jon M. Olley,4 Gavin J. Prideaux,5 Geoff M. Laslett,6 Alexander Baynes,7 M. A. Smith,8 Rhys Jones,9 Barton L. Smit	New ages for the last Australian megafauna: continent-wide extinction about 46,000 years ago	Science	292:1888-1892	m	A	Lake Victoria
6511	-34.0667	115.02	Macropodidae	Protemnodon	brehus	24	Sediment	Quartz					63	=	9	1S	63000	9000	OSL					single aliquot	well	yes	yes	Indirect	yes	WA	2001	Roberts RG, TF Flannery, LK Ayliffe, H Yoshida, JM Olley, GM Prideaux, GM Laslett, A Baynes, MA Smith, R Jones, BL Smith Hiroyuki Yoshida,1 Jon M. Olley,4 Gavin J. Prideaux,5 Geoff M. Laslett,6 Alexander Baynes,7 M. A. Smith,8 Rhys Jones,9 Barton L. Smit	New ages for the last Australian megafauna: continent-wide extinction about 46,000 years ago	Science	292:1888-1892	m	A	Mammoth Cave
6512	-37.0472	140.804	Macropodidae	Protemnodon	brehus	GH09-2	Sediment	Quartz					70	=	6	2S	70000	6000	OSL					single grain	partially	yes	no	Indirect	yes	SA	2012	Macken AC, GJ Prideaux, EH Reed	Variation and pattern in the responses of mammal faunas to Late Pleistocene climatic change in southeastern South Australia	Journal of Quaternary Science	27(4):415-424	m	A	Victoria Fossil Cave
6513	-34.0667	115.02	Macropodidae	Protemnodon	brehus	24	Sediment	Sediment					74	=	10	1S	74000	10000	OSL					single aliquot	well	yes	yes	Indirect	yes	WA	2001	Roberts RG, TF Flannery, LK Ayliffe, H Yoshida, JM Olley, GM Prideaux, GM Laslett, A Baynes, MA Smith, R Jones, BL Smith Hiroyuki Yoshida,1 Jon M. Olley,4 Gavin J. Prideaux,5 Geoff M. Laslett,6 Alexander Baynes,7 M. A. Smith,8 Rhys Jones,9 Barton L. Smit	New ages for the last Australian megafauna: continent-wide extinction about 46,000 years ago	Science	292:1888-1892	m	A	Mammoth Cave
6514	-29.8	140.167	Macropodidae	Protemnodon	brehus	21	Sediment	Quartz					75	=	9	1S	75000	9000	OSL					single aliquot	well	yes	yes	Indirect	yes	SA	2001	Roberts RG, TF Flannery, LK Ayliffe, H Yoshida, JM Olley, GM Prideaux, GM Laslett, A Baynes, MA Smith, R Jones, BL Smith Hiroyuki Yoshida,1 Jon M. Olley,4 Gavin J. Prideaux,5 Geoff M. Laslett,6 Alexander Baynes,7 M. A. Smith,8 Rhys Jones,9 Barton L. Smit	New ages for the last Australian megafauna: continent-wide extinction about 46,000 years ago	Science	292:1888-1892	m	A	Lake Callabonna
6515	-38.173	143.163	Macropodidae	Protemnodon	brehus	16	Sediment	Quartz					82	=	10	1S	82000	10000	OSL					single aliquot	well	yes	yes	Indirect	yes	VIC	2001	Roberts RG, TF Flannery, LK Ayliffe, H Yoshida, JM Olley, GM Prideaux, GM Laslett, A Baynes, MA Smith, R Jones, BL Smith Hiroyuki Yoshida,1 Jon M. Olley,4 Gavin J. Prideaux,5 Geoff M. Laslett,6 Alexander Baynes,7 M. A. Smith,8 Rhys Jones,9 Barton L. Smit	New ages for the last Australian megafauna: continent-wide extinction about 46,000 years ago	Science	292:1888-1892	m	A	Lake Colongulac
6516	-27.95	151.733	Macropodidae	Protemnodon	brehus	Ris√∏-060701	Sediment	Quartz					107	=	18	2S	107000	18000	OSL					single aliquot	well	yes	yes	Indirect	yes	QLD	2011	Price GJ, Webb GE, Zhao J-X, Feng Y-X, Murray AS Bernard N. Cooke b, Scott A. Hocknull e, Ian H. Sobbe	Dating megafaunal extinction on the Pleistocene Darling Downs, eastern Australia: the promise and pitfalls of dating as a test of extinction hypotheses	Quaternary Science Reviews	30:899-914	m	A	QML796
6517	-27.95	151.733	Macropodidae	Protemnodon	brehus	Ris√∏-060703	Sediment	Quartz					112	=	20	2S	112000	20000	OSL					single aliquot	well	yes	yes	Indirect	yes	QLD	2011	Price GJ, Webb GE, Zhao J-X, Feng Y-X, Murray AS Bernard N. Cooke b, Scott A. Hocknull e, Ian H. Sobbe	Dating megafaunal extinction on the Pleistocene Darling Downs, eastern Australia: the promise and pitfalls of dating as a test of extinction hypotheses	Quaternary Science Reviews	30:899-914	m	A	QML796
6518	-27.95	151.733	Macropodidae	Protemnodon	brehus	Ris√∏-060702	Sediment	Quartz					122	=	22	2S	122000	22000	OSL					single aliquot	well	yes	yes	Indirect	yes	QLD	2011	Price GJ, Webb GE, Zhao J-X, Feng Y-X, Murray AS Bernard N. Cooke b, Scott A. Hocknull e, Ian H. Sobbe	Dating megafaunal extinction on the Pleistocene Darling Downs, eastern Australia: the promise and pitfalls of dating as a test of extinction hypotheses	Quaternary Science Reviews	30:899-914	m	A	QML796
6519	-34.0667	115.017	Macropodidae	Protemnodon	brehus	26	Sediment	Quartz					141	=	21	1S	141000	21000	OSL					single aliquot	well	yes	yes	Indirect	yes	WA	2001	Roberts RG, TF Flannery, LK Ayliffe, H Yoshida, JM Olley, GM Prideaux, GM Laslett, A Baynes, MA Smith, R Jones, BL Smith Hiroyuki Yoshida,1 Jon M. Olley,4 Gavin J. Prideaux,5 Geoff M. Laslett,6 Alexander Baynes,7 M. A. Smith,8 Rhys Jones,9 Barton L. Smit	New ages for the last Australian megafauna: continent-wide extinction about 46,000 years ago	Science	292:1888-1892	m	A	Tight Entrance Cave
6520	-37.0333	140.8	Macropodidae	Protemnodon	brehus	NC2	Sediment	Quartz					231	=	21	2S	231000	21000	OSL					single aliquot	well	yes	yes	Indirect	yes	SA	2007	Prideaux GJ, RG Roberts, D Megirian, KE Westaway, JC Hellstrom, JM Olley	Mammalian responses to Pleistocene climate change in southeastern Australia	Geology	35(1):33-36	m	A	Cathedral Cave
6521	-37.0333	140.8	Macropodidae	Protemnodon	brehus	NC3	Sediment	Quartz					257	=	21	2S	257000	21000	OSL					single aliquot	well	yes	yes	Indirect	yes	SA	2007	Prideaux GJ, RG Roberts, D Megirian, KE Westaway, JC Hellstrom, JM Olley	Mammalian responses to Pleistocene climate change in southeastern Australia	Geology	35(1):33-36	m	A	Cathedral Cave
6523	-37.0333	140.8	Macropodidae	Protemnodon	brehus	NC4	Sediment	Quartz					292	=	19	2S	292000	19000	OSL					single aliquot	well	yes	yes	Indirect	yes	SA	2007	Prideaux GJ, RG Roberts, D Megirian, KE Westaway, JC Hellstrom, JM Olley	Mammalian responses to Pleistocene climate change in southeastern Australia	Geology	35(1):33-36	m	A	Cathedral Cave
6524	-37.0333	140.8	Macropodidae	Protemnodon	brehus	NCF1-3 mid	Flowstone	Calcite					297	=	9	2S	297000	9000	U-series Th/U (ICP-MS)	yes	yes							Indirect	yes	SA	2007	Prideaux GJ, RG Roberts, D Megirian, KE Westaway, JC Hellstrom, JM Olley	Mammalian responses to Pleistocene climate change in southeastern Australia	Geology	35(1):33-36	m	A	Cathedral Cave
6526	-37.0333	140.8	Macropodidae	Protemnodon	brehus	NC5	Sediment	Quartz					513	=	73	2S	513000	73000	OSL					single aliquot	well	yes	yes	Indirect	yes	SA	2007	Prideaux GJ, RG Roberts, D Megirian, KE Westaway, JC Hellstrom, JM Olley	Mammalian responses to Pleistocene climate change in southeastern Australia	Geology	35(1):33-36	m	A	Cathedral Cave
6527	-37.0333	140.8	Macropodidae	Protemnodon	brehus	NC6	Sediment	Quartz					535	=	49	2S	535000	49000	OSL					single aliquot	well	yes	yes	Indirect	yes	SA	2007	Prideaux GJ, RG Roberts, D Megirian, KE Westaway, JC Hellstrom, JM Olley	Mammalian responses to Pleistocene climate change in southeastern Australia	Geology	35(1):33-36	m	A	Cathedral Cave
6574	-34.0667	115.017	Macropodidae	Protemnodon	roechus	TEC-F (WAM 07.6.147)	Sediment	Calcite					44.9	=	1.3	1S	44900	1300	U-series Th/U (ICP-MS)		yes							Indirect	yes	WA	2010	Prideaux GJ, GA Gully, AMC Couzens, LK Ayliffe, NR Jankowski, Z Jacobs, RG Roberts, J C Hellstrom, MK Gagan, and LM Hatcher	Timing and dynamics of Late Pleistocene mammal extinctions in southwestern Australia	Proceedings of the National Academy of Sciences of the USA	107(51):22157-22162	m	A	Tight Entrance Cave
6575	-27.9167	151.967	Macropodidae	Protemnodon	roechus	1	Sediment	Quartz					46	=	6	1S	46000	6000	OSL					single aliquot	well	yes	yes	Indirect	yes	QLD	2001	Roberts RG, TF Flannery, LK Ayliffe, H Yoshida, JM Olley, GM Prideaux, GM Laslett, A Baynes, MA Smith, R Jones, BL Smith Hiroyuki Yoshida,1 Jon M. Olley,4 Gavin J. Prideaux,5 Geoff M. Laslett,6 Alexander Baynes,7 M. A. Smith,8 Rhys Jones,9 Barton L. Smit	New ages for the last Australian megafauna: continent-wide extinction about 46,000 years ago	Science	292:1888-1892	m	A	Ned's Gully
6576	-27.9167	151.967	Macropodidae	Protemnodon	roechus	1	Sediment	Quartz					47	=	6	1S	47000	6000	OSL					single aliquot	well	yes	yes	Indirect	yes	QLD	2001	Roberts RG, TF Flannery, LK Ayliffe, H Yoshida, JM Olley, GM Prideaux, GM Laslett, A Baynes, MA Smith, R Jones, BL Smith Hiroyuki Yoshida,1 Jon M. Olley,4 Gavin J. Prideaux,5 Geoff M. Laslett,6 Alexander Baynes,7 M. A. Smith,8 Rhys Jones,9 Barton L. Smit	New ages for the last Australian megafauna: continent-wide extinction about 46,000 years ago	Science	292:1888-1892	m	A	Ned's Gully
6577	-34.0667	115.017	Macropodidae	Protemnodon	roechus	TEC-F (unit G lower)	Sediment	Calcite					48.7	=	3	1S	48700	3000	U-series Th/U (ICP-MS)		yes							Indirect	yes	WA	2010	Prideaux GJ, GA Gully, AMC Couzens, LK Ayliffe, NR Jankowski, Z Jacobs, RG Roberts, J C Hellstrom, MK Gagan, and LM Hatcher	Timing and dynamics of Late Pleistocene mammal extinctions in southwestern Australia	Proceedings of the National Academy of Sciences of the USA	107(51):22157-22162	m	A	Tight Entrance Cave
6578	-34.0667	115.017	Macropodidae	Protemnodon	roechus	TEC‚ÄìF	Sediment	Quartz					70	=	4	1S	70000	4000	OSL					single grain	partially	yes	no	Indirect	yes	WA	2010	Prideaux GJ, GA Gully, AMC Couzens, LK Ayliffe, NR Jankowski, Z Jacobs, RG Roberts, J C Hellstrom, MK Gagan, and LM Hatcher	Timing and dynamics of Late Pleistocene mammal extinctions in southwestern Australia	Proceedings of the National Academy of Sciences of the USA	107(51):22157-22162	m	A	Tight Entrance Cave
6579	-27.95	151.733	Macropodidae	Protemnodon	roechus	Ris√∏-060701	Sediment	Quartz					107	=	18	2S	107000	18000	OSL					single aliquot	well	yes	yes	Indirect	yes	QLD	2011	Price GJ, Webb GE, Zhao J-X, Feng Y-X, Murray AS Bernard N. Cooke b, Scott A. Hocknull e, Ian H. Sobbe	Dating megafaunal extinction on the Pleistocene Darling Downs, eastern Australia: the promise and pitfalls of dating as a test of extinction hypotheses	Quaternary Science Reviews	30:899-914	m	A	QML796
6580	-34.0667	115.017	Macropodidae	Protemnodon	roechus	TEC-F	Sediment	Calcite					112	=	11	1S	112000	11000	U-series Th/U (ICP-MS)		yes							Indirect	yes	WA	2010	Prideaux GJ, GA Gully, AMC Couzens, LK Ayliffe, NR Jankowski, Z Jacobs, RG Roberts, J C Hellstrom, MK Gagan, and LM Hatcher	Timing and dynamics of Late Pleistocene mammal extinctions in southwestern Australia	Proceedings of the National Academy of Sciences of the USA	107(51):22157-22162	m	A	Tight Entrance Cave
6581	-34.0667	115.017	Macropodidae	Protemnodon	roechus	TE-FS-21a	Flowstone	Calcite					119.5	=	3.7	1S	119500	3700	U-series Th/U (TIMS)		yes							Indirect	yes	WA	2008	Ayliffe LK, GJ Prideaux, MI Bird, R Gr¬≥n, RG Roberts, GA Gully, R Jones, LK Fifield, RG Cresswell	Age constraints on Pleistocene megafauna at Tight Entrance Cave in southwestern Australia	Quaternary Science Reviews	27:1784-1788	m	A	Tight Entrance Cave
6582	-27.95	151.733	Macropodidae	Protemnodon	roechus	Ris√∏-060702	Sediment	Quartz					122	=	22	2S	122000	22000	OSL					single aliquot	well	yes	yes	Indirect	yes	QLD	2011	Price GJ, Webb GE, Zhao J-X, Feng Y-X, Murray AS Bernard N. Cooke b, Scott A. Hocknull e, Ian H. Sobbe	Dating megafaunal extinction on the Pleistocene Darling Downs, eastern Australia: the promise and pitfalls of dating as a test of extinction hypotheses	Quaternary Science Reviews	30:899-914	m	A	QML796
6583	-34.0667	115.017	Macropodidae	Protemnodon	roechus	TEC07‚Äì1	Sediment	Quartz					135	=	7	1S	135000	7000	OSL					single grain	well	yes	yes	Indirect	yes	WA	2010	Prideaux GJ, GA Gully, AMC Couzens, LK Ayliffe, NR Jankowski, Z Jacobs, RG Roberts, J C Hellstrom, MK Gagan, and LM Hatcher	Timing and dynamics of Late Pleistocene mammal extinctions in southwestern Australia	Proceedings of the National Academy of Sciences of the USA	107(51):22157-22162	m	A	Tight Entrance Cave
6584	-34.0667	115.017	Macropodidae	Protemnodon	roechus	TE-FS-UG	Flowstone	Calcite					136.8	=	2.6	1S	136800	2600	U-series Th/U (TIMS)		yes							Indirect	yes	WA	2008	Ayliffe LK, GJ Prideaux, MI Bird, R Gr¬≥n, RG Roberts, GA Gully, R Jones, LK Fifield, RG Cresswell	Age constraints on Pleistocene megafauna at Tight Entrance Cave in southwestern Australia	Quaternary Science Reviews	27:1784-1788	m	A	Tight Entrance Cave
6586	-34.0667	115.017	Macropodidae	Protemnodon	roechus	TEC-97	Sediment	Calcite					151	=	7	1S	151000	7000	U-series Th/U (ICP-MS)		yes							Indirect	yes	WA	2010	Prideaux GJ, GA Gully, AMC Couzens, LK Ayliffe, NR Jankowski, Z Jacobs, RG Roberts, J C Hellstrom, MK Gagan, and LM Hatcher	Timing and dynamics of Late Pleistocene mammal extinctions in southwestern Australia	Proceedings of the National Academy of Sciences of the USA	107(51):22157-22162	m	A	Tight Entrance Cave
6587	-37.0472	140.804	Macropodidae	Protemnodon	roechus	19	Sediment	Quartz					164	=	15	1S	164000	15000	OSL					single aliquot	well	yes	yes	Indirect	yes	SA	2001	Roberts RG, TF Flannery, LK Ayliffe, H Yoshida, JM Olley, GM Prideaux, GM Laslett, A Baynes, MA Smith, R Jones, BL Smith Hiroyuki Yoshida,1 Jon M. Olley,4 Gavin J. Prideaux,5 Geoff M. Laslett,6 Alexander Baynes,7 M. A. Smith,8 Rhys Jones,9 Barton L. Smit	New ages for the last Australian megafauna: continent-wide extinction about 46,000 years ago	Science	292:1888-1892	m	A	Victoria Fossil Cave
6607	-34.0839	141.782	Macropodidae	Protemnodon	species indet.	8	Sediment	Quartz					55	=	6	1S	55000	6000	OSL					single aliquot	well	yes	yes	Indirect	yes	NSW	2001	Roberts RG, TF Flannery, LK Ayliffe, H Yoshida, JM Olley, GM Prideaux, GM Laslett, A Baynes, MA Smith, R Jones, BL Smith Hiroyuki Yoshida,1 Jon M. Olley,4 Gavin J. Prideaux,5 Geoff M. Laslett,6 Alexander Baynes,7 M. A. Smith,8 Rhys Jones,9 Barton L. Smit	New ages for the last Australian megafauna: continent-wide extinction about 46,000 years ago	Science	292:1888-1892	m	A	Anabranch
6608	-42.5333	146.45	Macropodidae	Protemnodon	species indet.	JF-155	Sediment	Quartz					103	=	9	1S	103000	9000	OSL					multi aliquot	well	yes	yes	Indirect	yes	TAS	2008	Turney CSM, Flannery TF, Roberts RG	Late-surviving megafauna in Tasmania, Australia, implicate human involvement in their extinction	Proceedings of the National Academy of Sciences of the USA	105(34):12150-12153	m	A	Un-named Cave
6609	-27.95	151.733	Macropodidae	Protemnodon	species indet.	Ris√∏-060701	Sediment	Quartz					107	=	18	2S	107000	18000	OSL					single aliquot	well	yes	yes	Indirect	yes	QLD	2011	Price GJ, Webb GE, Zhao J-X, Feng Y-X, Murray AS Bernard N. Cooke b, Scott A. Hocknull e, Ian H. Sobbe	Dating megafaunal extinction on the Pleistocene Darling Downs, eastern Australia: the promise and pitfalls of dating as a test of extinction hypotheses	Quaternary Science Reviews	30:899-914	m	A	QML796
6610	-27.95	151.733	Macropodidae	Protemnodon	species indet.	Ris√∏-060703	Sediment	Quartz					112	=	20	2S	112000	20000	OSL					single aliquot	well	yes	yes	Indirect	yes	QLD	2011	Price GJ, Webb GE, Zhao J-X, Feng Y-X, Murray AS Bernard N. Cooke b, Scott A. Hocknull e, Ian H. Sobbe	Dating megafaunal extinction on the Pleistocene Darling Downs, eastern Australia: the promise and pitfalls of dating as a test of extinction hypotheses	Quaternary Science Reviews	30:899-914	m	A	QML796
6611	-27.95	151.733	Macropodidae	Protemnodon	species indet.	Ris√∏-060702	Sediment	Quartz					122	=	22	2S	122000	22000	OSL					single aliquot	well	yes	yes	Indirect	yes	QLD	2011	Price GJ, Webb GE, Zhao J-X, Feng Y-X, Murray AS Bernard N. Cooke b, Scott A. Hocknull e, Ian H. Sobbe	Dating megafaunal extinction on the Pleistocene Darling Downs, eastern Australia: the promise and pitfalls of dating as a test of extinction hypotheses	Quaternary Science Reviews	30:899-914	m	A	QML796
7496	-34.0667	115.017	Dasyuridae	Sarcophilus	harrisii	ANUA-10313	Sediment	Charcoal	ABOX-SC	ABOX	no	no	24.3	=	0.3	1S	28311	297	Radiocarbon (ABOX)									Indirect	yes	WA	2008	Ayliffe LK, GJ Prideaux, MI Bird, R Gr¬≥n, RG Roberts, GA Gully, R Jones, LK Fifield, RG Cresswell	Age constraints on Pleistocene megafauna at Tight Entrance Cave in southwestern Australia	Quaternary Science Reviews	27:1784-1788	m	A	Tight Entrance Cave
7497	-34.15	115.07	Dasyuridae	Sarcophilus	harrisii	DL-4	Sediment	Quartz					25.5	=	1.4	1S	25500	1400	OSL					single aliquot	well	yes	yes	Indirect	yes	WA	2001	Turney CSM, Bird MI, Fifield LK, Roberts RG, Smith M, Dortch CE, Gr√ºn R, Lawson E, Ayliffe LK, Miller GH, Dortch J, Cresswell RG	Early human occupation at Devil's Lair, Southwestern Australia 50,000 years ago	Quaternary Research	55(1):3-13	m	A	Devils Lair
7498	-34.0667	115.017	Dasyuridae	Sarcophilus	harrisii	ANUA-10412	Sediment	Charcoal	ABOX-SC	ABOX	no	no	30.3	=	0.4	1S	34319	337	Radiocarbon (ABOX)									Indirect	yes	WA	2008	Ayliffe LK, GJ Prideaux, MI Bird, R Gr¬≥n, RG Roberts, GA Gully, R Jones, LK Fifield, RG Cresswell	Age constraints on Pleistocene megafauna at Tight Entrance Cave in southwestern Australia	Quaternary Science Reviews	27:1784-1788	m	A	Tight Entrance Cave
7499	-34.0667	115.017	Dasyuridae	Sarcophilus	harrisii	TEC-H	Sediment	Quartz					32	=	3	1S	32000	3000	OSL					single grain	partially	yes	no	Indirect	yes	WA	2010	Prideaux GJ, GA Gully, AMC Couzens, LK Ayliffe, NR Jankowski, Z Jacobs, RG Roberts, J C Hellstrom, MK Gagan, and LM Hatcher	Timing and dynamics of Late Pleistocene mammal extinctions in southwestern Australia	Proceedings of the National Academy of Sciences of the USA	107(51):22157-22162	m	A	Tight Entrance Cave
7500	-34.0667	115.017	Dasyuridae	Sarcophilus	harrisii	ANUA-10324	Sediment	Charcoal	ABOX-SC	ABOX	no	no	32.8	=	0.8	1S	37066	981	Radiocarbon (ABOX)									Indirect	yes	WA	2008	Ayliffe LK, GJ Prideaux, MI Bird, R Gr¬≥n, RG Roberts, GA Gully, R Jones, LK Fifield, RG Cresswell	Age constraints on Pleistocene megafauna at Tight Entrance Cave in southwestern Australia	Quaternary Science Reviews	27:1784-1788	m	A	Tight Entrance Cave
7501	-34.0667	115.017	Dasyuridae	Sarcophilus	harrisii	TEC99‚Äìunit D	Sediment	Quartz					33	=	3	1S	33000	3000	OSL					single grain	partially	yes	no	Indirect	yes	WA	2010	Prideaux GJ, GA Gully, AMC Couzens, LK Ayliffe, NR Jankowski, Z Jacobs, RG Roberts, J C Hellstrom, MK Gagan, and LM Hatcher	Timing and dynamics of Late Pleistocene mammal extinctions in southwestern Australia	Proceedings of the National Academy of Sciences of the USA	107(51):22157-22162	m	A	Tight Entrance Cave
7502	-34.0667	115.017	Dasyuridae	Sarcophilus	harrisii	TEC07‚Äì5	Sediment	Quartz					34	=	2	1S	34000	2000	OSL					single grain	partially	yes	no	Indirect	yes	WA	2010	Prideaux GJ, GA Gully, AMC Couzens, LK Ayliffe, NR Jankowski, Z Jacobs, RG Roberts, J C Hellstrom, MK Gagan, and LM Hatcher	Timing and dynamics of Late Pleistocene mammal extinctions in southwestern Australia	Proceedings of the National Academy of Sciences of the USA	107(51):22157-22162	m	A	Tight Entrance Cave
7503	-34.0667	115.017	Dasyuridae	Sarcophilus	harrisii	ANUA-13410	Sediment	Charcoal	ABOX-SC	ABOX	no	no	43	=	2.7	1S	46599	1853	Radiocarbon (ABOX)									Indirect	yes	WA	2008	Ayliffe LK, GJ Prideaux, MI Bird, R Gr¬≥n, RG Roberts, GA Gully, R Jones, LK Fifield, RG Cresswell	Age constraints on Pleistocene megafauna at Tight Entrance Cave in southwestern Australia	Quaternary Science Reviews	27:1784-1788	m	A	Tight Entrance Cave
7504	-34.15	115.07	Dasyuridae	Sarcophilus	harrisii	DL-8	Sediment	Quartz					43.4	=	2.2	1S	43400	2200	OSL					single aliquot	well	yes	yes	Indirect	yes	WA	2001	Turney CSM, Bird MI, Fifield LK, Roberts RG, Smith M, Dortch CE, Gr√ºn R, Lawson E, Ayliffe LK, Miller GH, Dortch J, Cresswell RG	Early human occupation at Devil's Lair, Southwestern Australia 50,000 years ago	Quaternary Research	55(1):3-13	m	A	Devils Lair
7505	-34.15	115.07	Dasyuridae	Sarcophilus	harrisii	DL-7	Sediment	Quartz					44.4	=	2.1	1S	44400	2100	OSL					single aliquot	well	yes	yes	Indirect	yes	WA	2001	Turney CSM, Bird MI, Fifield LK, Roberts RG, Smith M, Dortch CE, Gr√ºn R, Lawson E, Ayliffe LK, Miller GH, Dortch J, Cresswell RG	Early human occupation at Devil's Lair, Southwestern Australia 50,000 years ago	Quaternary Research	55(1):3-13	m	A	Devils Lair
7506	-34.0667	115.017	Dasyuridae	Sarcophilus	harrisii	TEC-F (WAM 07.6.147)	Sediment	Calcite					44.9	=	1.3	1S	44900	1300	U-series Th/U (ICP-MS)		yes							Indirect	yes	WA	2010	Prideaux GJ, GA Gully, AMC Couzens, LK Ayliffe, NR Jankowski, Z Jacobs, RG Roberts, J C Hellstrom, MK Gagan, and LM Hatcher	Timing and dynamics of Late Pleistocene mammal extinctions in southwestern Australia	Proceedings of the National Academy of Sciences of the USA	107(51):22157-22162	m	A	Tight Entrance Cave
7507	-34.15	115.07	Dasyuridae	Sarcophilus	harrisii	DL-19	Sediment	Quartz					47.1	=	2.6	1S	47100	2600	OSL					single aliquot	well	yes	yes	Indirect	yes	WA	2001	Turney CSM, Bird MI, Fifield LK, Roberts RG, Smith M, Dortch CE, Gr√ºn R, Lawson E, Ayliffe LK, Miller GH, Dortch J, Cresswell RG	Early human occupation at Devil's Lair, Southwestern Australia 50,000 years ago	Quaternary Research	55(1):3-13	m	A	Devils Lair
7508	-34.0667	115.017	Dasyuridae	Sarcophilus	harrisii	TE-FS-16a	Flowstone	Calcite					47.8	=	2.8	1S	47800	2800	U-series Th/U (TIMS)		yes							Indirect	yes	WA	2008	Ayliffe LK, GJ Prideaux, MI Bird, R Gr¬≥n, RG Roberts, GA Gully, R Jones, LK Fifield, RG Cresswell	Age constraints on Pleistocene megafauna at Tight Entrance Cave in southwestern Australia	Quaternary Science Reviews	27:1784-1788	m	A	Tight Entrance Cave
7509	-34.0667	115.017	Dasyuridae	Sarcophilus	harrisii	TEC-F (unit G lower)	Sediment	Calcite					48.7	=	3	1S	48700	3000	U-series Th/U (ICP-MS)		yes							Indirect	yes	WA	2010	Prideaux GJ, GA Gully, AMC Couzens, LK Ayliffe, NR Jankowski, Z Jacobs, RG Roberts, J C Hellstrom, MK Gagan, and LM Hatcher	Timing and dynamics of Late Pleistocene mammal extinctions in southwestern Australia	Proceedings of the National Academy of Sciences of the USA	107(51):22157-22162	m	A	Tight Entrance Cave
7511	-34.0667	115.017	Dasyuridae	Sarcophilus	harrisii	TEC‚ÄìF	Sediment	Quartz					70	=	4	1S	70000	4000	OSL					single grain	partially	yes	no	Indirect	yes	WA	2010	Prideaux GJ, GA Gully, AMC Couzens, LK Ayliffe, NR Jankowski, Z Jacobs, RG Roberts, J C Hellstrom, MK Gagan, and LM Hatcher	Timing and dynamics of Late Pleistocene mammal extinctions in southwestern Australia	Proceedings of the National Academy of Sciences of the USA	107(51):22157-22162	m	A	Tight Entrance Cave
7512	-34.0667	115.017	Dasyuridae	Sarcophilus	harrisii	TEC-F	Sediment	Calcite					112	=	11	1S	112000	11000	U-series Th/U (ICP-MS)		yes							Indirect	yes	WA	2010	Prideaux GJ, GA Gully, AMC Couzens, LK Ayliffe, NR Jankowski, Z Jacobs, RG Roberts, J C Hellstrom, MK Gagan, and LM Hatcher	Timing and dynamics of Late Pleistocene mammal extinctions in southwestern Australia	Proceedings of the National Academy of Sciences of the USA	107(51):22157-22162	m	A	Tight Entrance Cave
7513	-34.0667	115.017	Dasyuridae	Sarcophilus	harrisii	TE-FS-21a	Flowstone	Calcite					119.5	=	3.7	1S	119500	3700	U-series Th/U (TIMS)		yes							Indirect	yes	WA	2008	Ayliffe LK, GJ Prideaux, MI Bird, R Gr¬≥n, RG Roberts, GA Gully, R Jones, LK Fifield, RG Cresswell	Age constraints on Pleistocene megafauna at Tight Entrance Cave in southwestern Australia	Quaternary Science Reviews	27:1784-1788	m	A	Tight Entrance Cave
7514	-34.0667	115.017	Dasyuridae	Sarcophilus	harrisii	TEC07‚Äì1	Sediment	Quartz					135	=	7	1S	135000	7000	OSL					single grain	well	yes	yes	Indirect	yes	WA	2010	Prideaux GJ, GA Gully, AMC Couzens, LK Ayliffe, NR Jankowski, Z Jacobs, RG Roberts, J C Hellstrom, MK Gagan, and LM Hatcher	Timing and dynamics of Late Pleistocene mammal extinctions in southwestern Australia	Proceedings of the National Academy of Sciences of the USA	107(51):22157-22162	m	A	Tight Entrance Cave
7515	-34.0667	115.017	Dasyuridae	Sarcophilus	harrisii	TE-FS-UG	Flowstone	Calcite					136.8	=	2.6	1S	136800	2600	U-series Th/U (TIMS)		yes							Indirect	yes	WA	2008	Ayliffe LK, GJ Prideaux, MI Bird, R Gr¬≥n, RG Roberts, GA Gully, R Jones, LK Fifield, RG Cresswell	Age constraints on Pleistocene megafauna at Tight Entrance Cave in southwestern Australia	Quaternary Science Reviews	27:1784-1788	m	A	Tight Entrance Cave
7516	-34.0667	115.017	Dasyuridae	Sarcophilus	harrisii	TEC-97	Sediment	Calcite					151	=	7	1S	151000	7000	U-series Th/U (ICP-MS)		yes							Indirect	yes	WA	2010	Prideaux GJ, GA Gully, AMC Couzens, LK Ayliffe, NR Jankowski, Z Jacobs, RG Roberts, J C Hellstrom, MK Gagan, and LM Hatcher	Timing and dynamics of Late Pleistocene mammal extinctions in southwestern Australia	Proceedings of the National Academy of Sciences of the USA	107(51):22157-22162	m	A	Tight Entrance Cave
7589	-27.9167	151.967	Dasyuridae	Sarcophilus	laniarius	1	Sediment	Quartz					46	=	6	1S	46000	6000	OSL					single aliquot	well	yes	yes	Indirect	yes	QLD	2001	Roberts RG, TF Flannery, LK Ayliffe, H Yoshida, JM Olley, GM Prideaux, GM Laslett, A Baynes, MA Smith, R Jones, BL Smith Hiroyuki Yoshida,1 Jon M. Olley,4 Gavin J. Prideaux,5 Geoff M. Laslett,6 Alexander Baynes,7 M. A. Smith,8 Rhys Jones,9 Barton L. Smit	New ages for the last Australian megafauna: continent-wide extinction about 46,000 years ago	Science	292:1888-1892	m	A	Ned's Gully
7590	-27.9167	151.967	Dasyuridae	Sarcophilus	laniarius	1	Sediment	Quartz					47	=	6	1S	47000	6000	OSL					single aliquot	well	yes	yes	Indirect	yes	QLD	2001	Roberts RG, TF Flannery, LK Ayliffe, H Yoshida, JM Olley, GM Prideaux, GM Laslett, A Baynes, MA Smith, R Jones, BL Smith Hiroyuki Yoshida,1 Jon M. Olley,4 Gavin J. Prideaux,5 Geoff M. Laslett,6 Alexander Baynes,7 M. A. Smith,8 Rhys Jones,9 Barton L. Smit	New ages for the last Australian megafauna: continent-wide extinction about 46,000 years ago	Science	292:1888-1892	m	A	Ned's Gully
7591	-38.173	143.163	Dasyuridae	Sarcophilus	laniarius	16	Sediment	Quartz					82	=	10	1S	82000	10000	OSL					single aliquot	well	yes	yes	Indirect	yes	VIC	2001	Roberts RG, TF Flannery, LK Ayliffe, H Yoshida, JM Olley, GM Prideaux, GM Laslett, A Baynes, MA Smith, R Jones, BL Smith Hiroyuki Yoshida,1 Jon M. Olley,4 Gavin J. Prideaux,5 Geoff M. Laslett,6 Alexander Baynes,7 M. A. Smith,8 Rhys Jones,9 Barton L. Smit	New ages for the last Australian megafauna: continent-wide extinction about 46,000 years ago	Science	292:1888-1892	m	A	Lake Colongulac
7592	-34.02	141.342	Dasyuridae	Sarcophilus	laniarius	11	Sediment	Quartz					97	=	11	1S	97000	11000	OSL					single aliquot	well	yes	yes	Indirect	yes	NSW	2001	Roberts RG, TF Flannery, LK Ayliffe, H Yoshida, JM Olley, GM Prideaux, GM Laslett, A Baynes, MA Smith, R Jones, BL Smith Hiroyuki Yoshida,1 Jon M. Olley,4 Gavin J. Prideaux,5 Geoff M. Laslett,6 Alexander Baynes,7 M. A. Smith,8 Rhys Jones,9 Barton L. Smit	New ages for the last Australian megafauna: continent-wide extinction about 46,000 years ago	Science	292:1888-1892	m	A	Lake Victoria
7593	-27.95	151.733	Dasyuridae	Sarcophilus	laniarius	Ris√∏-060703	Sediment	Quartz					112	=	20	2S	112000	20000	OSL					single aliquot	well	yes	yes	Indirect	yes	QLD	2011	Price GJ, Webb GE, Zhao J-X, Feng Y-X, Murray AS Bernard N. Cooke b, Scott A. Hocknull e, Ian H. Sobbe	Dating megafaunal extinction on the Pleistocene Darling Downs, eastern Australia: the promise and pitfalls of dating as a test of extinction hypotheses	Quaternary Science Reviews	30:899-914	m	A	QML796
7594	-27.95	151.733	Dasyuridae	Sarcophilus	laniarius	Ris√∏-060702	Sediment	Quartz					122	=	22	2S	122000	22000	OSL					single aliquot	well	yes	yes	Indirect	yes	QLD	2011	Price GJ, Webb GE, Zhao J-X, Feng Y-X, Murray AS Bernard N. Cooke b, Scott A. Hocknull e, Ian H. Sobbe	Dating megafaunal extinction on the Pleistocene Darling Downs, eastern Australia: the promise and pitfalls of dating as a test of extinction hypotheses	Quaternary Science Reviews	30:899-914	m	A	QML796
7595	-34.0667	115.017	Dasyuridae	Sarcophilus	laniarius	26	Sediment	Quartz					141	=	21	1S	141000	21000	OSL					single aliquot	well	yes	yes	Indirect	yes	WA	2001	Roberts RG, TF Flannery, LK Ayliffe, H Yoshida, JM Olley, GM Prideaux, GM Laslett, A Baynes, MA Smith, R Jones, BL Smith Hiroyuki Yoshida,1 Jon M. Olley,4 Gavin J. Prideaux,5 Geoff M. Laslett,6 Alexander Baynes,7 M. A. Smith,8 Rhys Jones,9 Barton L. Smit	New ages for the last Australian megafauna: continent-wide extinction about 46,000 years ago	Science	292:1888-1892	m	A	Tight Entrance Cave
7596	-37.0472	140.804	Dasyuridae	Sarcophilus	laniarius	19	Sediment	Quartz					164	=	15	1S	164000	15000	OSL					single aliquot	well	yes	yes	Indirect	yes	SA	2001	Roberts RG, TF Flannery, LK Ayliffe, H Yoshida, JM Olley, GM Prideaux, GM Laslett, A Baynes, MA Smith, R Jones, BL Smith Hiroyuki Yoshida,1 Jon M. Olley,4 Gavin J. Prideaux,5 Geoff M. Laslett,6 Alexander Baynes,7 M. A. Smith,8 Rhys Jones,9 Barton L. Smit	New ages for the last Australian megafauna: continent-wide extinction about 46,000 years ago	Science	292:1888-1892	m	A	Victoria Fossil Cave
7598	-37.0333	140.8	Dasyuridae	Sarcophilus	laniarius	NC4	Sediment	Quartz					292	=	19	2S	292000	19000	OSL					single aliquot	well	yes	yes	Indirect	yes	SA	2007	Prideaux GJ, RG Roberts, D Megirian, KE Westaway, JC Hellstrom, JM Olley	Mammalian responses to Pleistocene climate change in southeastern Australia	Geology	35(1):33-36	m	A	Cathedral Cave
7599	-37.0333	140.8	Dasyuridae	Sarcophilus	laniarius	NCF1-3 mid	Flowstone	Calcite					297	=	9	2S	297000	9000	U-series Th/U (ICP-MS)	yes	yes							Indirect	yes	SA	2007	Prideaux GJ, RG Roberts, D Megirian, KE Westaway, JC Hellstrom, JM Olley	Mammalian responses to Pleistocene climate change in southeastern Australia	Geology	35(1):33-36	m	A	Cathedral Cave
7601	-37.0333	140.8	Dasyuridae	Sarcophilus	laniarius	NC5	Sediment	Quartz					513	=	73	2S	513000	73000	OSL					single aliquot	well	yes	yes	Indirect	yes	SA	2007	Prideaux GJ, RG Roberts, D Megirian, KE Westaway, JC Hellstrom, JM Olley	Mammalian responses to Pleistocene climate change in southeastern Australia	Geology	35(1):33-36	m	A	Cathedral Cave
7602	-37.0333	140.8	Dasyuridae	Sarcophilus	laniarius	NC6	Sediment	Quartz					535	=	49	2S	535000	49000	OSL					single aliquot	well	yes	yes	Indirect	yes	SA	2007	Prideaux GJ, RG Roberts, D Megirian, KE Westaway, JC Hellstrom, JM Olley	Mammalian responses to Pleistocene climate change in southeastern Australia	Geology	35(1):33-36	m	A	Cathedral Cave
7747	-37.0472	140.804	Macropodidae	Simosthenurus	baileyi	19	Sediment	Quartz					164	=	15	1S	164000	15000	OSL					single aliquot	well	yes	yes	Indirect	yes	SA	2001	Roberts RG, TF Flannery, LK Ayliffe, H Yoshida, JM Olley, GM Prideaux, GM Laslett, A Baynes, MA Smith, R Jones, BL Smith Hiroyuki Yoshida,1 Jon M. Olley,4 Gavin J. Prideaux,5 Geoff M. Laslett,6 Alexander Baynes,7 M. A. Smith,8 Rhys Jones,9 Barton L. Smit	New ages for the last Australian megafauna: continent-wide extinction about 46,000 years ago	Science	292:1888-1892	m	A	Victoria Fossil Cave
7748	-37.0472	140.804	Macropodidae	Simosthenurus	maddocki	GH09-5	Sediment	Quartz					76	=	6	2S	76000	6000	OSL					single grain	partially	yes	no	Indirect	yes	SA	2012	Macken AC, GJ Prideaux, EH Reed	Variation and pattern in the responses of mammal faunas to Late Pleistocene climatic change in southeastern South Australia	Journal of Quaternary Science	27(4):415-424	m	A	Victoria Fossil Cave
7749	-37.0472	140.804	Macropodidae	Simosthenurus	maddocki	GH09-4	Sediment	Quartz					77	=	6	2S	77000	6000	OSL					single grain	partially	yes	no	Indirect	yes	SA	2012	Macken AC, GJ Prideaux, EH Reed	Variation and pattern in the responses of mammal faunas to Late Pleistocene climatic change in southeastern South Australia	Journal of Quaternary Science	27(4):415-424	m	A	Victoria Fossil Cave
7750	-37.0472	140.804	Macropodidae	Simosthenurus	maddocki	GH09-1	Sediment	Quartz					82	=	6	2S	82000	6000	OSL					single grain	partially	yes	no	Indirect	yes	SA	2012	Macken AC, GJ Prideaux, EH Reed	Variation and pattern in the responses of mammal faunas to Late Pleistocene climatic change in southeastern South Australia	Journal of Quaternary Science	27(4):415-424	m	A	Victoria Fossil Cave
7751	-37.0472	140.804	Macropodidae	Simosthenurus	maddocki	GH09-3	Sediment	Quartz					82	=	8	2S	82000	8000	OSL					single grain	partially	yes	no	Indirect	yes	SA	2012	Macken AC, GJ Prideaux, EH Reed	Variation and pattern in the responses of mammal faunas to Late Pleistocene climatic change in southeastern South Australia	Journal of Quaternary Science	27(4):415-424	m	A	Victoria Fossil Cave
7752	-37.0472	140.804	Macropodidae	Simosthenurus	maddocki	19	Sediment	Quartz					164	=	15	1S	164000	15000	OSL					single aliquot	well	yes	yes	Indirect	yes	SA	2001	Roberts RG, TF Flannery, LK Ayliffe, H Yoshida, JM Olley, GM Prideaux, GM Laslett, A Baynes, MA Smith, R Jones, BL Smith Hiroyuki Yoshida,1 Jon M. Olley,4 Gavin J. Prideaux,5 Geoff M. Laslett,6 Alexander Baynes,7 M. A. Smith,8 Rhys Jones,9 Barton L. Smit	New ages for the last Australian megafauna: continent-wide extinction about 46,000 years ago	Science	292:1888-1892	m	A	Victoria Fossil Cave
7753	-37.0333	140.8	Macropodidae	Simosthenurus	maddocki	NC2	Sediment	Quartz					231	=	21	2S	231000	21000	OSL					single aliquot	well	yes	yes	Indirect	yes	SA	2007	Prideaux GJ, RG Roberts, D Megirian, KE Westaway, JC Hellstrom, JM Olley	Mammalian responses to Pleistocene climate change in southeastern Australia	Geology	35(1):33-36	m	A	Cathedral Cave
7754	-37.0333	140.8	Macropodidae	Simosthenurus	maddocki	NC3	Sediment	Quartz					257	=	21	2S	257000	21000	OSL					single aliquot	well	yes	yes	Indirect	yes	SA	2007	Prideaux GJ, RG Roberts, D Megirian, KE Westaway, JC Hellstrom, JM Olley	Mammalian responses to Pleistocene climate change in southeastern Australia	Geology	35(1):33-36	m	A	Cathedral Cave
7764	-34.0667	115.017	Macropodidae	Simosthenurus	occidentalis	ANUA-13410	Sediment	Charcoal	ABOX-SC	ABOX	no	no	43	=	2.7	1S	46599	1853	Radiocarbon (ABOX)									Indirect	yes	WA	2008	Ayliffe LK, GJ Prideaux, MI Bird, R Gr¬≥n, RG Roberts, GA Gully, R Jones, LK Fifield, RG Cresswell	Age constraints on Pleistocene megafauna at Tight Entrance Cave in southwestern Australia	Quaternary Science Reviews	27:1784-1788	m	A	Tight Entrance Cave
7765	-34.0667	115.017	Macropodidae	Simosthenurus	occidentalis	TEC-F (WAM 07.6.147)	Sediment	Calcite					44.9	=	1.3	1S	44900	1300	U-series Th/U (ICP-MS)		yes							Indirect	yes	WA	2010	Prideaux GJ, GA Gully, AMC Couzens, LK Ayliffe, NR Jankowski, Z Jacobs, RG Roberts, J C Hellstrom, MK Gagan, and LM Hatcher	Timing and dynamics of Late Pleistocene mammal extinctions in southwestern Australia	Proceedings of the National Academy of Sciences of the USA	107(51):22157-22162	m	A	Tight Entrance Cave
7766	-34.052	115.026	Macropodidae	Simosthenurus	occidentalis	23	Sediment	Quartz					46	=	6	1S	46000	6000	OSL					single aliquot	well	yes	yes	Indirect	yes	WA	2001	Roberts RG, TF Flannery, LK Ayliffe, H Yoshida, JM Olley, GM Prideaux, GM Laslett, A Baynes, MA Smith, R Jones, BL Smith Hiroyuki Yoshida,1 Jon M. Olley,4 Gavin J. Prideaux,5 Geoff M. Laslett,6 Alexander Baynes,7 M. A. Smith,8 Rhys Jones,9 Barton L. Smit	New ages for the last Australian megafauna: continent-wide extinction about 46,000 years ago	Science	292:1888-1892	m	A	Kudjal Yolgah Cave
7767	-34.052	115.026	Macropodidae	Simosthenurus	occidentalis	23	Sediment	Quartz					46	=	2	1S	46000	2000	OSL					single aliquot	well	yes	yes	Indirect	yes	WA	2001	Roberts RG, TF Flannery, LK Ayliffe, H Yoshida, JM Olley, GM Prideaux, GM Laslett, A Baynes, MA Smith, R Jones, BL Smith Hiroyuki Yoshida,1 Jon M. Olley,4 Gavin J. Prideaux,5 Geoff M. Laslett,6 Alexander Baynes,7 M. A. Smith,8 Rhys Jones,9 Barton L. Smit	New ages for the last Australian megafauna: continent-wide extinction about 46,000 years ago	Science	292:1888-1892	m	A	Kudjal Yolgah Cave
7768	-34.0667	115.017	Macropodidae	Simosthenurus	occidentalis	TEC-F (unit G lower)	Sediment	Calcite					48.7	=	3	1S	48700	3000	U-series Th/U (ICP-MS)		yes							Indirect	yes	WA	2010	Prideaux GJ, GA Gully, AMC Couzens, LK Ayliffe, NR Jankowski, Z Jacobs, RG Roberts, J C Hellstrom, MK Gagan, and LM Hatcher	Timing and dynamics of Late Pleistocene mammal extinctions in southwestern Australia	Proceedings of the National Academy of Sciences of the USA	107(51):22157-22162	m	A	Tight Entrance Cave
7771	-40.8	145.13	Macropodidae	Simosthenurus	occidentalis	ST-1	Sediment	Quartz					56	=	4	1S	56000	4000	OSL					multi aliquot	well	yes	yes	Indirect	yes	TAS	2008	Turney CSM, Flannery TF, Roberts RG	Late-surviving megafauna in Tasmania, Australia, implicate human involvement in their extinction	Proceedings of the National Academy of Sciences of the USA	105(34):12150-12153	m	A	Scotchtown Cave
7772	-34.0667	115.02	Macropodidae	Simosthenurus	occidentalis	24	Sediment	Quartz					63	=	9	1S	63000	9000	OSL					single aliquot	well	yes	yes	Indirect	yes	WA	2001	Roberts RG, TF Flannery, LK Ayliffe, H Yoshida, JM Olley, GM Prideaux, GM Laslett, A Baynes, MA Smith, R Jones, BL Smith Hiroyuki Yoshida,1 Jon M. Olley,4 Gavin J. Prideaux,5 Geoff M. Laslett,6 Alexander Baynes,7 M. A. Smith,8 Rhys Jones,9 Barton L. Smit	New ages for the last Australian megafauna: continent-wide extinction about 46,000 years ago	Science	292:1888-1892	m	A	Mammoth Cave
7773	-37.0472	140.804	Macropodidae	Simosthenurus	occidentalis	GH09-2	Sediment	Quartz					70	=	6	2S	70000	6000	OSL					single grain	partially	yes	no	Indirect	yes	SA	2012	Macken AC, GJ Prideaux, EH Reed	Variation and pattern in the responses of mammal faunas to Late Pleistocene climatic change in southeastern South Australia	Journal of Quaternary Science	27(4):415-424	m	A	Victoria Fossil Cave
7774	-34.0667	115.017	Macropodidae	Simosthenurus	occidentalis	TEC‚ÄìF	Sediment	Quartz					70	=	4	1S	70000	4000	OSL					single grain	partially	yes	no	Indirect	yes	WA	2010	Prideaux GJ, GA Gully, AMC Couzens, LK Ayliffe, NR Jankowski, Z Jacobs, RG Roberts, J C Hellstrom, MK Gagan, and LM Hatcher	Timing and dynamics of Late Pleistocene mammal extinctions in southwestern Australia	Proceedings of the National Academy of Sciences of the USA	107(51):22157-22162	m	A	Tight Entrance Cave
7775	-34.0667	115.02	Macropodidae	Simosthenurus	occidentalis	24	Sediment	Sediment					74	=	10	1S	74000	10000	OSL					single aliquot	well	yes	yes	Indirect	yes	WA	2001	Roberts RG, TF Flannery, LK Ayliffe, H Yoshida, JM Olley, GM Prideaux, GM Laslett, A Baynes, MA Smith, R Jones, BL Smith Hiroyuki Yoshida,1 Jon M. Olley,4 Gavin J. Prideaux,5 Geoff M. Laslett,6 Alexander Baynes,7 M. A. Smith,8 Rhys Jones,9 Barton L. Smit	New ages for the last Australian megafauna: continent-wide extinction about 46,000 years ago	Science	292:1888-1892	m	A	Mammoth Cave
7776	-37.0472	140.804	Macropodidae	Simosthenurus	occidentalis	GH09-3	Sediment	Quartz					82	=	8	2S	82000	8000	OSL					single grain	partially	yes	no	Indirect	yes	SA	2012	Macken AC, GJ Prideaux, EH Reed	Variation and pattern in the responses of mammal faunas to Late Pleistocene climatic change in southeastern South Australia	Journal of Quaternary Science	27(4):415-424	m	A	Victoria Fossil Cave
7777	-34.0667	115.017	Macropodidae	Simosthenurus	occidentalis	TEC-F	Sediment	Calcite					112	=	11	1S	112000	11000	U-series Th/U (ICP-MS)		yes							Indirect	yes	WA	2010	Prideaux GJ, GA Gully, AMC Couzens, LK Ayliffe, NR Jankowski, Z Jacobs, RG Roberts, J C Hellstrom, MK Gagan, and LM Hatcher	Timing and dynamics of Late Pleistocene mammal extinctions in southwestern Australia	Proceedings of the National Academy of Sciences of the USA	107(51):22157-22162	m	A	Tight Entrance Cave
7778	-34.0667	115.017	Macropodidae	Simosthenurus	occidentalis	TE-FS-21a	Flowstone	Calcite					119.5	=	3.7	1S	119500	3700	U-series Th/U (TIMS)		yes							Indirect	yes	WA	2008	Ayliffe LK, GJ Prideaux, MI Bird, R Gr¬≥n, RG Roberts, GA Gully, R Jones, LK Fifield, RG Cresswell	Age constraints on Pleistocene megafauna at Tight Entrance Cave in southwestern Australia	Quaternary Science Reviews	27:1784-1788	m	A	Tight Entrance Cave
7779	-34.0667	115.017	Macropodidae	Simosthenurus	occidentalis	TEC07‚Äì1	Sediment	Quartz					135	=	7	1S	135000	7000	OSL					single grain	well	yes	yes	Indirect	yes	WA	2010	Prideaux GJ, GA Gully, AMC Couzens, LK Ayliffe, NR Jankowski, Z Jacobs, RG Roberts, J C Hellstrom, MK Gagan, and LM Hatcher	Timing and dynamics of Late Pleistocene mammal extinctions in southwestern Australia	Proceedings of the National Academy of Sciences of the USA	107(51):22157-22162	m	A	Tight Entrance Cave
7780	-34.0667	115.017	Macropodidae	Simosthenurus	occidentalis	TE-FS-UG	Flowstone	Calcite					136.8	=	2.6	1S	136800	2600	U-series Th/U (TIMS)		yes							Indirect	yes	WA	2008	Ayliffe LK, GJ Prideaux, MI Bird, R Gr¬≥n, RG Roberts, GA Gully, R Jones, LK Fifield, RG Cresswell	Age constraints on Pleistocene megafauna at Tight Entrance Cave in southwestern Australia	Quaternary Science Reviews	27:1784-1788	m	A	Tight Entrance Cave
7782	-34.0667	115.017	Macropodidae	Simosthenurus	occidentalis	TEC-97	Sediment	Calcite					151	=	7	1S	151000	7000	U-series Th/U (ICP-MS)		yes							Indirect	yes	WA	2010	Prideaux GJ, GA Gully, AMC Couzens, LK Ayliffe, NR Jankowski, Z Jacobs, RG Roberts, J C Hellstrom, MK Gagan, and LM Hatcher	Timing and dynamics of Late Pleistocene mammal extinctions in southwestern Australia	Proceedings of the National Academy of Sciences of the USA	107(51):22157-22162	m	A	Tight Entrance Cave
7783	-37.0472	140.804	Macropodidae	Simosthenurus	occidentalis	19	Sediment	Quartz					164	=	15	1S	164000	15000	OSL					single aliquot	well	yes	yes	Indirect	yes	SA	2001	Roberts RG, TF Flannery, LK Ayliffe, H Yoshida, JM Olley, GM Prideaux, GM Laslett, A Baynes, MA Smith, R Jones, BL Smith Hiroyuki Yoshida,1 Jon M. Olley,4 Gavin J. Prideaux,5 Geoff M. Laslett,6 Alexander Baynes,7 M. A. Smith,8 Rhys Jones,9 Barton L. Smit	New ages for the last Australian megafauna: continent-wide extinction about 46,000 years ago	Science	292:1888-1892	m	A	Victoria Fossil Cave
7784	-37.0333	140.8	Macropodidae	Simosthenurus	occidentalis	NC3	Sediment	Quartz					257	=	21	2S	257000	21000	OSL					single aliquot	well	yes	yes	Indirect	yes	SA	2007	Prideaux GJ, RG Roberts, D Megirian, KE Westaway, JC Hellstrom, JM Olley	Mammalian responses to Pleistocene climate change in southeastern Australia	Geology	35(1):33-36	m	A	Cathedral Cave
7786	-37.0333	140.8	Macropodidae	Simosthenurus	occidentalis	NC4	Sediment	Quartz					292	=	19	2S	292000	19000	OSL					single aliquot	well	yes	yes	Indirect	yes	SA	2007	Prideaux GJ, RG Roberts, D Megirian, KE Westaway, JC Hellstrom, JM Olley	Mammalian responses to Pleistocene climate change in southeastern Australia	Geology	35(1):33-36	m	A	Cathedral Cave
7787	-37.0333	140.8	Macropodidae	Simosthenurus	occidentalis	NCF1-3 mid	Flowstone	Calcite					297	=	9	2S	297000	9000	U-series Th/U (ICP-MS)	yes	yes							Indirect	yes	SA	2007	Prideaux GJ, RG Roberts, D Megirian, KE Westaway, JC Hellstrom, JM Olley	Mammalian responses to Pleistocene climate change in southeastern Australia	Geology	35(1):33-36	m	A	Cathedral Cave
7788	-37.0333	140.8	Macropodidae	Simosthenurus	occidentalis	NCF1-1 base	Flowstone	Calcite					396	=	19	2S	396000	19000	U-series Th/U (ICP-MS)	yes	yes							Indirect	yes	SA	2007	Prideaux GJ, RG Roberts, D Megirian, KE Westaway, JC Hellstrom, JM Olley	Mammalian responses to Pleistocene climate change in southeastern Australia	Geology	35(1):33-36	m	A	Cathedral Cave
7789	-37.0333	140.8	Macropodidae	Simosthenurus	occidentalis	NC5	Sediment	Quartz					513	=	73	2S	513000	73000	OSL					single aliquot	well	yes	yes	Indirect	yes	SA	2007	Prideaux GJ, RG Roberts, D Megirian, KE Westaway, JC Hellstrom, JM Olley	Mammalian responses to Pleistocene climate change in southeastern Australia	Geology	35(1):33-36	m	A	Cathedral Cave
7790	-37.0333	140.8	Macropodidae	Simosthenurus	occidentalis	NC6	Sediment	Quartz					535	=	49	2S	535000	49000	OSL					single aliquot	well	yes	yes	Indirect	yes	SA	2007	Prideaux GJ, RG Roberts, D Megirian, KE Westaway, JC Hellstrom, JM Olley	Mammalian responses to Pleistocene climate change in southeastern Australia	Geology	35(1):33-36	m	A	Cathedral Cave
7838	-34.0667	115.017	Macropodidae	Simosthenurus	pales	TEC-F (WAM 07.6.147)	Sediment	Calcite					44.9	=	1.3	1S	44900	1300	U-series Th/U (ICP-MS)		yes							Indirect	yes	WA	2010	Prideaux GJ, GA Gully, AMC Couzens, LK Ayliffe, NR Jankowski, Z Jacobs, RG Roberts, J C Hellstrom, MK Gagan, and LM Hatcher	Timing and dynamics of Late Pleistocene mammal extinctions in southwestern Australia	Proceedings of the National Academy of Sciences of the USA	107(51):22157-22162	m	A	Tight Entrance Cave
7840	-34.0667	115.017	Macropodidae	Simosthenurus	pales	TEC-F (unit G lower)	Sediment	Calcite					48.7	=	3	1S	48700	3000	U-series Th/U (ICP-MS)		yes							Indirect	yes	WA	2010	Prideaux GJ, GA Gully, AMC Couzens, LK Ayliffe, NR Jankowski, Z Jacobs, RG Roberts, J C Hellstrom, MK Gagan, and LM Hatcher	Timing and dynamics of Late Pleistocene mammal extinctions in southwestern Australia	Proceedings of the National Academy of Sciences of the USA	107(51):22157-22162	m	A	Tight Entrance Cave
7841	-34.0667	115.017	Macropodidae	Simosthenurus	pales	TEC‚ÄìF	Sediment	Quartz					70	=	4	1S	70000	4000	OSL					single grain	partially	yes	no	Indirect	yes	WA	2010	Prideaux GJ, GA Gully, AMC Couzens, LK Ayliffe, NR Jankowski, Z Jacobs, RG Roberts, J C Hellstrom, MK Gagan, and LM Hatcher	Timing and dynamics of Late Pleistocene mammal extinctions in southwestern Australia	Proceedings of the National Academy of Sciences of the USA	107(51):22157-22162	m	A	Tight Entrance Cave
7842	-34.0667	115.017	Macropodidae	Simosthenurus	pales	TEC-F	Sediment	Calcite					112	=	11	1S	112000	11000	U-series Th/U (ICP-MS)		yes							Indirect	yes	WA	2010	Prideaux GJ, GA Gully, AMC Couzens, LK Ayliffe, NR Jankowski, Z Jacobs, RG Roberts, J C Hellstrom, MK Gagan, and LM Hatcher	Timing and dynamics of Late Pleistocene mammal extinctions in southwestern Australia	Proceedings of the National Academy of Sciences of the USA	107(51):22157-22162	m	A	Tight Entrance Cave
7843	-34.0667	115.017	Macropodidae	Simosthenurus	pales	TE-FS-21a	Flowstone	Calcite					119.5	=	3.7	1S	119500	3700	U-series Th/U (TIMS)		yes							Indirect	yes	WA	2008	Ayliffe LK, GJ Prideaux, MI Bird, R Gr¬≥n, RG Roberts, GA Gully, R Jones, LK Fifield, RG Cresswell	Age constraints on Pleistocene megafauna at Tight Entrance Cave in southwestern Australia	Quaternary Science Reviews	27:1784-1788	m	A	Tight Entrance Cave
7844	-34.0667	115.017	Macropodidae	Simosthenurus	pales	TEC07‚Äì1	Sediment	Quartz					135	=	7	1S	135000	7000	OSL					single grain	well	yes	yes	Indirect	yes	WA	2010	Prideaux GJ, GA Gully, AMC Couzens, LK Ayliffe, NR Jankowski, Z Jacobs, RG Roberts, J C Hellstrom, MK Gagan, and LM Hatcher	Timing and dynamics of Late Pleistocene mammal extinctions in southwestern Australia	Proceedings of the National Academy of Sciences of the USA	107(51):22157-22162	m	A	Tight Entrance Cave
7845	-34.0667	115.017	Macropodidae	Simosthenurus	pales	TE-FS-UG	Flowstone	Calcite					136.8	=	2.6	1S	136800	2600	U-series Th/U (TIMS)		yes							Indirect	yes	WA	2008	Ayliffe LK, GJ Prideaux, MI Bird, R Gr¬≥n, RG Roberts, GA Gully, R Jones, LK Fifield, RG Cresswell	Age constraints on Pleistocene megafauna at Tight Entrance Cave in southwestern Australia	Quaternary Science Reviews	27:1784-1788	m	A	Tight Entrance Cave
7847	-34.0667	115.017	Macropodidae	Simosthenurus	pales	TEC-97	Sediment	Calcite					151	=	7	1S	151000	7000	U-series Th/U (ICP-MS)		yes							Indirect	yes	WA	2010	Prideaux GJ, GA Gully, AMC Couzens, LK Ayliffe, NR Jankowski, Z Jacobs, RG Roberts, J C Hellstrom, MK Gagan, and LM Hatcher	Timing and dynamics of Late Pleistocene mammal extinctions in southwestern Australia	Proceedings of the National Academy of Sciences of the USA	107(51):22157-22162	m	A	Tight Entrance Cave
7848	-37.0472	140.804	Macropodidae	Simosthenurus	pales	19	Sediment	Quartz					164	=	15	1S	164000	15000	OSL					single aliquot	well	yes	yes	Indirect	yes	SA	2001	Roberts RG, TF Flannery, LK Ayliffe, H Yoshida, JM Olley, GM Prideaux, GM Laslett, A Baynes, MA Smith, R Jones, BL Smith Hiroyuki Yoshida,1 Jon M. Olley,4 Gavin J. Prideaux,5 Geoff M. Laslett,6 Alexander Baynes,7 M. A. Smith,8 Rhys Jones,9 Barton L. Smit	New ages for the last Australian megafauna: continent-wide extinction about 46,000 years ago	Science	292:1888-1892	m	A	Victoria Fossil Cave
7849	-37.0333	140.8	Macropodidae	Simosthenurus	pales	NC3	Sediment	Quartz					257	=	21	2S	257000	21000	OSL					single aliquot	well	yes	yes	Indirect	yes	SA	2007	Prideaux GJ, RG Roberts, D Megirian, KE Westaway, JC Hellstrom, JM Olley	Mammalian responses to Pleistocene climate change in southeastern Australia	Geology	35(1):33-36	m	A	Cathedral Cave
7857	-38.173	143.163	Macropodidae	Simosthenurus	species indet.	16	Sediment	Quartz					82	=	10	1S	82000	10000	OSL					single aliquot	well	yes	yes	Indirect	yes	VIC	2001	Roberts RG, TF Flannery, LK Ayliffe, H Yoshida, JM Olley, GM Prideaux, GM Laslett, A Baynes, MA Smith, R Jones, BL Smith Hiroyuki Yoshida,1 Jon M. Olley,4 Gavin J. Prideaux,5 Geoff M. Laslett,6 Alexander Baynes,7 M. A. Smith,8 Rhys Jones,9 Barton L. Smit	New ages for the last Australian megafauna: continent-wide extinction about 46,000 years ago	Science	292:1888-1892	m	A	Lake Colongulac
7858	-42.5333	146.45	Macropodidae	Simosthenurus	species indet.	JF-155	Sediment	Quartz					103	=	9	1S	103000	9000	OSL					multi aliquot	well	yes	yes	Indirect	yes	TAS	2008	Turney CSM, Flannery TF, Roberts RG	Late-surviving megafauna in Tasmania, Australia, implicate human involvement in their extinction	Proceedings of the National Academy of Sciences of the USA	105(34):12150-12153	m	A	Un-named Cave
8028	-34.02	141.342	Macropodidae	Sthenurus	andersoni	9 & 10	Sediment	Quartz					52	=	8	1S	52000	8000	OSL					single aliquot	well	yes	yes	Indirect	yes	NSW	2001	Roberts RG, TF Flannery, LK Ayliffe, H Yoshida, JM Olley, GM Prideaux, GM Laslett, A Baynes, MA Smith, R Jones, BL Smith Hiroyuki Yoshida,1 Jon M. Olley,4 Gavin J. Prideaux,5 Geoff M. Laslett,6 Alexander Baynes,7 M. A. Smith,8 Rhys Jones,9 Barton L. Smit	New ages for the last Australian megafauna: continent-wide extinction about 46,000 years ago	Science	292:1888-1892	m	A	Lake Victoria
8029	-34.02	141.342	Macropodidae	Sthenurus	andersoni	10	Sediment	Quartz					54	=	7	1S	54000	7000	OSL					single aliquot	well	yes	yes	Indirect	yes	NSW	2001	Roberts RG, TF Flannery, LK Ayliffe, H Yoshida, JM Olley, GM Prideaux, GM Laslett, A Baynes, MA Smith, R Jones, BL Smith Hiroyuki Yoshida,1 Jon M. Olley,4 Gavin J. Prideaux,5 Geoff M. Laslett,6 Alexander Baynes,7 M. A. Smith,8 Rhys Jones,9 Barton L. Smit	New ages for the last Australian megafauna: continent-wide extinction about 46,000 years ago	Science	292:1888-1892	m	A	Lake Victoria
8030	-37.0472	140.804	Macropodidae	Sthenurus	andersoni	GH09-2	Sediment	Quartz					70	=	6	2S	70000	6000	OSL					single grain	partially	yes	no	Indirect	yes	SA	2012	Macken AC, GJ Prideaux, EH Reed	Variation and pattern in the responses of mammal faunas to Late Pleistocene climatic change in southeastern South Australia	Journal of Quaternary Science	27(4):415-424	m	A	Victoria Fossil Cave
8031	-29.8	140.167	Macropodidae	Sthenurus	andersoni	21	Sediment	Quartz					75	=	9	1S	75000	9000	OSL					single aliquot	well	yes	yes	Indirect	yes	SA	2001	Roberts RG, TF Flannery, LK Ayliffe, H Yoshida, JM Olley, GM Prideaux, GM Laslett, A Baynes, MA Smith, R Jones, BL Smith Hiroyuki Yoshida,1 Jon M. Olley,4 Gavin J. Prideaux,5 Geoff M. Laslett,6 Alexander Baynes,7 M. A. Smith,8 Rhys Jones,9 Barton L. Smit	New ages for the last Australian megafauna: continent-wide extinction about 46,000 years ago	Science	292:1888-1892	m	A	Lake Callabonna
8032	-27.95	151.733	Macropodidae	Sthenurus	andersoni	Ris√∏-060701	Sediment	Quartz					107	=	18	2S	107000	18000	OSL					single aliquot	well	yes	yes	Indirect	yes	QLD	2011	Price GJ, Webb GE, Zhao J-X, Feng Y-X, Murray AS Bernard N. Cooke b, Scott A. Hocknull e, Ian H. Sobbe	Dating megafaunal extinction on the Pleistocene Darling Downs, eastern Australia: the promise and pitfalls of dating as a test of extinction hypotheses	Quaternary Science Reviews	30:899-914	m	A	QML796
8033	-34.0667	115.017	Macropodidae	Sthenurus	andersoni	TEC-F	Sediment	Calcite					112	=	11	1S	112000	11000	U-series Th/U (ICP-MS)		yes							Indirect	yes	WA	2010	Prideaux GJ, GA Gully, AMC Couzens, LK Ayliffe, NR Jankowski, Z Jacobs, RG Roberts, J C Hellstrom, MK Gagan, and LM Hatcher	Timing and dynamics of Late Pleistocene mammal extinctions in southwestern Australia	Proceedings of the National Academy of Sciences of the USA	107(51):22157-22162	m	A	Tight Entrance Cave
8034	-34.0667	115.017	Macropodidae	Sthenurus	andersoni	TE-FS-21a	Flowstone	Calcite					119.5	=	3.7	1S	119500	3700	U-series Th/U (TIMS)		yes							Indirect	yes	WA	2008	Ayliffe LK, GJ Prideaux, MI Bird, R Gr¬≥n, RG Roberts, GA Gully, R Jones, LK Fifield, RG Cresswell	Age constraints on Pleistocene megafauna at Tight Entrance Cave in southwestern Australia	Quaternary Science Reviews	27:1784-1788	m	A	Tight Entrance Cave
8035	-34.0667	115.017	Macropodidae	Sthenurus	andersoni	TE-FS-UG	Flowstone	Calcite					136.8	=	2.6	1S	136800	2600	U-series Th/U (TIMS)		yes							Indirect	yes	WA	2008	Ayliffe LK, GJ Prideaux, MI Bird, R Gr¬≥n, RG Roberts, GA Gully, R Jones, LK Fifield, RG Cresswell	Age constraints on Pleistocene megafauna at Tight Entrance Cave in southwestern Australia	Quaternary Science Reviews	27:1784-1788	m	A	Tight Entrance Cave
8036	-37.0472	140.804	Macropodidae	Sthenurus	andersoni	19	Sediment	Quartz					164	=	15	1S	164000	15000	OSL					single aliquot	well	yes	yes	Indirect	yes	SA	2001	Roberts RG, TF Flannery, LK Ayliffe, H Yoshida, JM Olley, GM Prideaux, GM Laslett, A Baynes, MA Smith, R Jones, BL Smith Hiroyuki Yoshida,1 Jon M. Olley,4 Gavin J. Prideaux,5 Geoff M. Laslett,6 Alexander Baynes,7 M. A. Smith,8 Rhys Jones,9 Barton L. Smit	New ages for the last Australian megafauna: continent-wide extinction about 46,000 years ago	Science	292:1888-1892	m	A	Victoria Fossil Cave
8038	-37.0333	140.8	Macropodidae	Sthenurus	andersoni	NC4	Sediment	Quartz					292	=	19	2S	292000	19000	OSL					single aliquot	well	yes	yes	Indirect	yes	SA	2007	Prideaux GJ, RG Roberts, D Megirian, KE Westaway, JC Hellstrom, JM Olley	Mammalian responses to Pleistocene climate change in southeastern Australia	Geology	35(1):33-36	m	A	Cathedral Cave
8039	-37.0333	140.8	Macropodidae	Sthenurus	andersoni	NCF1-3 mid	Flowstone	Calcite					297	=	9	2S	297000	9000	U-series Th/U (ICP-MS)	yes	yes							Indirect	yes	SA	2007	Prideaux GJ, RG Roberts, D Megirian, KE Westaway, JC Hellstrom, JM Olley	Mammalian responses to Pleistocene climate change in southeastern Australia	Geology	35(1):33-36	m	A	Cathedral Cave
8041	-37.0333	140.8	Macropodidae	Sthenurus	andersoni	NC5	Sediment	Quartz					513	=	73	2S	513000	73000	OSL					single aliquot	well	yes	yes	Indirect	yes	SA	2007	Prideaux GJ, RG Roberts, D Megirian, KE Westaway, JC Hellstrom, JM Olley	Mammalian responses to Pleistocene climate change in southeastern Australia	Geology	35(1):33-36	m	A	Cathedral Cave
8042	-37.0333	140.8	Macropodidae	Sthenurus	andersoni	NC6	Sediment	Quartz					535	=	49	2S	535000	49000	OSL					single aliquot	well	yes	yes	Indirect	yes	SA	2007	Prideaux GJ, RG Roberts, D Megirian, KE Westaway, JC Hellstrom, JM Olley	Mammalian responses to Pleistocene climate change in southeastern Australia	Geology	35(1):33-36	m	A	Cathedral Cave
8062	-34.02	141.342	Macropodidae	Sthenurus	atlas	9 & 10	Sediment	Quartz					52	=	8	1S	52000	8000	OSL					single aliquot	well	yes	yes	Indirect	yes	NSW	2001	Roberts RG, TF Flannery, LK Ayliffe, H Yoshida, JM Olley, GM Prideaux, GM Laslett, A Baynes, MA Smith, R Jones, BL Smith Hiroyuki Yoshida,1 Jon M. Olley,4 Gavin J. Prideaux,5 Geoff M. Laslett,6 Alexander Baynes,7 M. A. Smith,8 Rhys Jones,9 Barton L. Smit	New ages for the last Australian megafauna: continent-wide extinction about 46,000 years ago	Science	292:1888-1892	m	A	Lake Victoria
8063	-34.02	141.342	Macropodidae	Sthenurus	atlas	10	Sediment	Quartz					54	=	7	1S	54000	7000	OSL					single aliquot	well	yes	yes	Indirect	yes	NSW	2001	Roberts RG, TF Flannery, LK Ayliffe, H Yoshida, JM Olley, GM Prideaux, GM Laslett, A Baynes, MA Smith, R Jones, BL Smith Hiroyuki Yoshida,1 Jon M. Olley,4 Gavin J. Prideaux,5 Geoff M. Laslett,6 Alexander Baynes,7 M. A. Smith,8 Rhys Jones,9 Barton L. Smit	New ages for the last Australian megafauna: continent-wide extinction about 46,000 years ago	Science	292:1888-1892	m	A	Lake Victoria
8070	-35.9495	136.735	Macropodidae	Sthenurus	species indet.	2169A	Tooth	Enamel					68	=	7	1S	68000	7000	CSUS-ESR									Direct		SA	2008	Gr√ºn R, Wells R, Eggins S, Spooner N, Aubert M, Brown L, Rhodes E	Electron spin resonance dating of South Australian megafauna sites	Australian Journal of Earth Sciences	55:917-935	m*	A*	Black Creek Swamp
8071	-35.9495	136.735	Macropodidae	Sthenurus	species indet.	2166A	Tooth	Enamel					84	=	7	1S	84000	7000	CSUS-ESR									Direct		SA	2008	Gr√ºn R, Wells R, Eggins S, Spooner N, Aubert M, Brown L, Rhodes E	Electron spin resonance dating of South Australian megafauna sites	Australian Journal of Earth Sciences	55:917-935	m*	A*	Black Creek Swamp
8072	-29.8	140.167	Macropodidae	Sthenurus	stirlingi	21	Sediment	Quartz					75	=	9	1S	75000	9000	OSL					single aliquot	well	yes	yes	Indirect	yes	SA	2001	Roberts RG, TF Flannery, LK Ayliffe, H Yoshida, JM Olley, GM Prideaux, GM Laslett, A Baynes, MA Smith, R Jones, BL Smith Hiroyuki Yoshida,1 Jon M. Olley,4 Gavin J. Prideaux,5 Geoff M. Laslett,6 Alexander Baynes,7 M. A. Smith,8 Rhys Jones,9 Barton L. Smit	New ages for the last Australian megafauna: continent-wide extinction about 46,000 years ago	Science	292:1888-1892	m	A	Lake Callabonna
8074	-34.02	141.342	Macropodidae	Sthenurus	tindalei	9 & 10	Sediment	Quartz					52	=	8	1S	52000	8000	OSL					single aliquot	well	yes	yes	Indirect	yes	NSW	2001	Roberts RG, TF Flannery, LK Ayliffe, H Yoshida, JM Olley, GM Prideaux, GM Laslett, A Baynes, MA Smith, R Jones, BL Smith Hiroyuki Yoshida,1 Jon M. Olley,4 Gavin J. Prideaux,5 Geoff M. Laslett,6 Alexander Baynes,7 M. A. Smith,8 Rhys Jones,9 Barton L. Smit	New ages for the last Australian megafauna: continent-wide extinction about 46,000 years ago	Science	292:1888-1892	m	A	Lake Victoria
8075	-34.02	141.342	Macropodidae	Sthenurus	tindalei	10	Sediment	Quartz					54	=	7	1S	54000	7000	OSL					single aliquot	well	yes	yes	Indirect	yes	NSW	2001	Roberts RG, TF Flannery, LK Ayliffe, H Yoshida, JM Olley, GM Prideaux, GM Laslett, A Baynes, MA Smith, R Jones, BL Smith Hiroyuki Yoshida,1 Jon M. Olley,4 Gavin J. Prideaux,5 Geoff M. Laslett,6 Alexander Baynes,7 M. A. Smith,8 Rhys Jones,9 Barton L. Smit	New ages for the last Australian megafauna: continent-wide extinction about 46,000 years ago	Science	292:1888-1892	m	A	Lake Victoria
8076	-29.8	140.167	Macropodidae	Sthenurus	tindalei	21	Sediment	Quartz					75	=	9	1S	75000	9000	OSL					single aliquot	well	yes	yes	Indirect	yes	SA	2001	Roberts RG, TF Flannery, LK Ayliffe, H Yoshida, JM Olley, GM Prideaux, GM Laslett, A Baynes, MA Smith, R Jones, BL Smith Hiroyuki Yoshida,1 Jon M. Olley,4 Gavin J. Prideaux,5 Geoff M. Laslett,6 Alexander Baynes,7 M. A. Smith,8 Rhys Jones,9 Barton L. Smit	New ages for the last Australian megafauna: continent-wide extinction about 46,000 years ago	Science	292:1888-1892	m	A	Lake Callabonna
8158	-34.0667	115.017	Thylacinidae	Thylacinus	cynocephalus	ANUA-10311	Sediment	Charcoal	ABOX-SC	ABOX	no	no	25.3	=	0.4	1S	29429	490	Radiocarbon (ABOX)									Indirect	yes	WA	2008	Ayliffe LK, GJ Prideaux, MI Bird, R Gr¬≥n, RG Roberts, GA Gully, R Jones, LK Fifield, RG Cresswell	Age constraints on Pleistocene megafauna at Tight Entrance Cave in southwestern Australia	Quaternary Science Reviews	27:1784-1788	m	A	Tight Entrance Cave
8159	-34.0667	115.017	Thylacinidae	Thylacinus	cynocephalus	ANUA-10412	Sediment	Charcoal	ABOX-SC	ABOX	no	no	30.3	=	0.4	1S	34319	337	Radiocarbon (ABOX)									Indirect	yes	WA	2008	Ayliffe LK, GJ Prideaux, MI Bird, R Gr¬≥n, RG Roberts, GA Gully, R Jones, LK Fifield, RG Cresswell	Age constraints on Pleistocene megafauna at Tight Entrance Cave in southwestern Australia	Quaternary Science Reviews	27:1784-1788	m	A	Tight Entrance Cave
8160	-34.0667	115.017	Thylacinidae	Thylacinus	cynocephalus	TEC-H	Sediment	Quartz					32	=	3	1S	32000	3000	OSL					single grain	partially	yes	no	Indirect	yes	WA	2010	Prideaux GJ, GA Gully, AMC Couzens, LK Ayliffe, NR Jankowski, Z Jacobs, RG Roberts, J C Hellstrom, MK Gagan, and LM Hatcher	Timing and dynamics of Late Pleistocene mammal extinctions in southwestern Australia	Proceedings of the National Academy of Sciences of the USA	107(51):22157-22162	m	A	Tight Entrance Cave
8161	-34.0667	115.017	Thylacinidae	Thylacinus	cynocephalus	ANUA-10324	Sediment	Charcoal	ABOX-SC	ABOX	no	no	32.8	=	0.8	1S	37066	981	Radiocarbon (ABOX)									Indirect	yes	WA	2008	Ayliffe LK, GJ Prideaux, MI Bird, R Gr¬≥n, RG Roberts, GA Gully, R Jones, LK Fifield, RG Cresswell	Age constraints on Pleistocene megafauna at Tight Entrance Cave in southwestern Australia	Quaternary Science Reviews	27:1784-1788	m	A	Tight Entrance Cave
8162	-34.0667	115.017	Thylacinidae	Thylacinus	cynocephalus	TEC99‚Äìunit D	Sediment	Quartz					33	=	3	1S	33000	3000	OSL					single grain	partially	yes	no	Indirect	yes	WA	2010	Prideaux GJ, GA Gully, AMC Couzens, LK Ayliffe, NR Jankowski, Z Jacobs, RG Roberts, J C Hellstrom, MK Gagan, and LM Hatcher	Timing and dynamics of Late Pleistocene mammal extinctions in southwestern Australia	Proceedings of the National Academy of Sciences of the USA	107(51):22157-22162	m	A	Tight Entrance Cave
8163	-34.0667	115.017	Thylacinidae	Thylacinus	cynocephalus	TEC07‚Äì5	Sediment	Quartz					34	=	2	1S	34000	2000	OSL					single grain	partially	yes	no	Indirect	yes	WA	2010	Prideaux GJ, GA Gully, AMC Couzens, LK Ayliffe, NR Jankowski, Z Jacobs, RG Roberts, J C Hellstrom, MK Gagan, and LM Hatcher	Timing and dynamics of Late Pleistocene mammal extinctions in southwestern Australia	Proceedings of the National Academy of Sciences of the USA	107(51):22157-22162	m	A	Tight Entrance Cave
8164	-34.0667	115.017	Thylacinidae	Thylacinus	cynocephalus	TEC-F (WAM 07.6.147)	Sediment	Calcite					44.9	=	1.3	1S	44900	1300	U-series Th/U (ICP-MS)		yes							Indirect	yes	WA	2010	Prideaux GJ, GA Gully, AMC Couzens, LK Ayliffe, NR Jankowski, Z Jacobs, RG Roberts, J C Hellstrom, MK Gagan, and LM Hatcher	Timing and dynamics of Late Pleistocene mammal extinctions in southwestern Australia	Proceedings of the National Academy of Sciences of the USA	107(51):22157-22162	m	A	Tight Entrance Cave
8166	-34.15	115.07	Thylacinidae	Thylacinus	cynocephalus	DL-19	Sediment	Quartz					47.1	=	2.6	1S	47100	2600	OSL					single aliquot	well	yes	yes	Indirect	yes	WA	2001	Turney CSM, Bird MI, Fifield LK, Roberts RG, Smith M, Dortch CE, Gr√ºn R, Lawson E, Ayliffe LK, Miller GH, Dortch J, Cresswell RG	Early human occupation at Devil's Lair, Southwestern Australia 50,000 years ago	Quaternary Research	55(1):3-13	m	A	Devils Lair
8167	-34.0667	115.017	Thylacinidae	Thylacinus	cynocephalus	TE-FS-16a	Flowstone	Calcite					47.8	=	2.8	1S	47800	2800	U-series Th/U (TIMS)		yes							Indirect	yes	WA	2008	Ayliffe LK, GJ Prideaux, MI Bird, R Gr¬≥n, RG Roberts, GA Gully, R Jones, LK Fifield, RG Cresswell	Age constraints on Pleistocene megafauna at Tight Entrance Cave in southwestern Australia	Quaternary Science Reviews	27:1784-1788	m	A	Tight Entrance Cave
8170	-34.0667	115.017	Thylacinidae	Thylacinus	cynocephalus	TEC‚ÄìF	Sediment	Quartz					70	=	4	1S	70000	4000	OSL					single grain	partially	yes	no	Indirect	yes	WA	2010	Prideaux GJ, GA Gully, AMC Couzens, LK Ayliffe, NR Jankowski, Z Jacobs, RG Roberts, J C Hellstrom, MK Gagan, and LM Hatcher	Timing and dynamics of Late Pleistocene mammal extinctions in southwestern Australia	Proceedings of the National Academy of Sciences of the USA	107(51):22157-22162	m	A	Tight Entrance Cave
8171	-37.0472	140.804	Thylacinidae	Thylacinus	cynocephalus	GH09-5	Sediment	Quartz					76	=	6	2S	76000	6000	OSL					single grain	partially	yes	no	Indirect	yes	SA	2012	Macken AC, GJ Prideaux, EH Reed	Variation and pattern in the responses of mammal faunas to Late Pleistocene climatic change in southeastern South Australia	Journal of Quaternary Science	27(4):415-424	m	A	Victoria Fossil Cave
8172	-37.0472	140.804	Thylacinidae	Thylacinus	cynocephalus	GH09-4	Sediment	Quartz					77	=	6	2S	77000	6000	OSL					single grain	partially	yes	no	Indirect	yes	SA	2012	Macken AC, GJ Prideaux, EH Reed	Variation and pattern in the responses of mammal faunas to Late Pleistocene climatic change in southeastern South Australia	Journal of Quaternary Science	27(4):415-424	m	A	Victoria Fossil Cave
8173	-37.0472	140.804	Thylacinidae	Thylacinus	cynocephalus	GH09-1	Sediment	Quartz					82	=	6	2S	82000	6000	OSL					single grain	partially	yes	no	Indirect	yes	SA	2012	Macken AC, GJ Prideaux, EH Reed	Variation and pattern in the responses of mammal faunas to Late Pleistocene climatic change in southeastern South Australia	Journal of Quaternary Science	27(4):415-424	m	A	Victoria Fossil Cave
8174	-37.0472	140.804	Thylacinidae	Thylacinus	cynocephalus	GH09-3	Sediment	Quartz					82	=	8	2S	82000	8000	OSL					single grain	partially	yes	no	Indirect	yes	SA	2012	Macken AC, GJ Prideaux, EH Reed	Variation and pattern in the responses of mammal faunas to Late Pleistocene climatic change in southeastern South Australia	Journal of Quaternary Science	27(4):415-424	m	A	Victoria Fossil Cave
8175	-34.0667	115.017	Thylacinidae	Thylacinus	cynocephalus	TEC-F	Sediment	Calcite					112	=	11	1S	112000	11000	U-series Th/U (ICP-MS)		yes							Indirect	yes	WA	2010	Prideaux GJ, GA Gully, AMC Couzens, LK Ayliffe, NR Jankowski, Z Jacobs, RG Roberts, J C Hellstrom, MK Gagan, and LM Hatcher	Timing and dynamics of Late Pleistocene mammal extinctions in southwestern Australia	Proceedings of the National Academy of Sciences of the USA	107(51):22157-22162	m	A	Tight Entrance Cave
8176	-34.0667	115.017	Thylacinidae	Thylacinus	cynocephalus	TE-FS-21a	Flowstone	Calcite					119.5	=	3.7	1S	119500	3700	U-series Th/U (TIMS)		yes							Indirect	yes	WA	2008	Ayliffe LK, GJ Prideaux, MI Bird, R Gr¬≥n, RG Roberts, GA Gully, R Jones, LK Fifield, RG Cresswell	Age constraints on Pleistocene megafauna at Tight Entrance Cave in southwestern Australia	Quaternary Science Reviews	27:1784-1788	m	A	Tight Entrance Cave
8177	-34.0667	115.017	Thylacinidae	Thylacinus	cynocephalus	TEC07‚Äì1	Sediment	Quartz					135	=	7	1S	135000	7000	OSL					single grain	well	yes	yes	Indirect	yes	WA	2010	Prideaux GJ, GA Gully, AMC Couzens, LK Ayliffe, NR Jankowski, Z Jacobs, RG Roberts, J C Hellstrom, MK Gagan, and LM Hatcher	Timing and dynamics of Late Pleistocene mammal extinctions in southwestern Australia	Proceedings of the National Academy of Sciences of the USA	107(51):22157-22162	m	A	Tight Entrance Cave
8178	-34.0667	115.017	Thylacinidae	Thylacinus	cynocephalus	TE-FS-UG	Flowstone	Calcite					136.8	=	2.6	1S	136800	2600	U-series Th/U (TIMS)		yes							Indirect	yes	WA	2008	Ayliffe LK, GJ Prideaux, MI Bird, R Gr¬≥n, RG Roberts, GA Gully, R Jones, LK Fifield, RG Cresswell	Age constraints on Pleistocene megafauna at Tight Entrance Cave in southwestern Australia	Quaternary Science Reviews	27:1784-1788	m	A	Tight Entrance Cave
8180	-34.0667	115.017	Thylacinidae	Thylacinus	cynocephalus	TEC-97	Sediment	Calcite					151	=	7	1S	151000	7000	U-series Th/U (ICP-MS)		yes							Indirect	yes	WA	2010	Prideaux GJ, GA Gully, AMC Couzens, LK Ayliffe, NR Jankowski, Z Jacobs, RG Roberts, J C Hellstrom, MK Gagan, and LM Hatcher	Timing and dynamics of Late Pleistocene mammal extinctions in southwestern Australia	Proceedings of the National Academy of Sciences of the USA	107(51):22157-22162	m	A	Tight Entrance Cave
8181	-37.0333	140.8	Thylacinidae	Thylacinus	cynocephalus	NC1	Sediment	Quartz					206	=	16	2S	206000	16000	OSL					single aliquot	well	yes	yes	Indirect	yes	SA	2007	Prideaux GJ, RG Roberts, D Megirian, KE Westaway, JC Hellstrom, JM Olley	Mammalian responses to Pleistocene climate change in southeastern Australia	Geology	35(1):33-36	m	A	Cathedral Cave
8182	-37.0333	140.8	Thylacinidae	Thylacinus	cynocephalus	NC3	Sediment	Quartz					257	=	21	2S	257000	21000	OSL					single aliquot	well	yes	yes	Indirect	yes	SA	2007	Prideaux GJ, RG Roberts, D Megirian, KE Westaway, JC Hellstrom, JM Olley	Mammalian responses to Pleistocene climate change in southeastern Australia	Geology	35(1):33-36	m	A	Cathedral Cave
8185	-37.0333	140.8	Thylacinidae	Thylacinus	cynocephalus	NC4	Sediment	Quartz					292	=	19	2S	292000	19000	OSL					single aliquot	well	yes	yes	Indirect	yes	SA	2007	Prideaux GJ, RG Roberts, D Megirian, KE Westaway, JC Hellstrom, JM Olley	Mammalian responses to Pleistocene climate change in southeastern Australia	Geology	35(1):33-36	m	A	Cathedral Cave
8186	-37.0333	140.8	Thylacinidae	Thylacinus	cynocephalus	NCF1-3 mid	Flowstone	Calcite					297	=	9	2S	297000	9000	U-series Th/U (ICP-MS)	yes	yes							Indirect	yes	SA	2007	Prideaux GJ, RG Roberts, D Megirian, KE Westaway, JC Hellstrom, JM Olley	Mammalian responses to Pleistocene climate change in southeastern Australia	Geology	35(1):33-36	m	A	Cathedral Cave
8273	-34.0667	115.017	Thylacoleonidae	Thylacoleo	carnifex	TEC-F (WAM 07.6.147)	Sediment	Calcite					44.9	=	1.3	1S	44900	1300	U-series Th/U (ICP-MS)		yes							Indirect	yes	WA	2010	Prideaux GJ, GA Gully, AMC Couzens, LK Ayliffe, NR Jankowski, Z Jacobs, RG Roberts, J C Hellstrom, MK Gagan, and LM Hatcher	Timing and dynamics of Late Pleistocene mammal extinctions in southwestern Australia	Proceedings of the National Academy of Sciences of the USA	107(51):22157-22162	m	A	Tight Entrance Cave
8274	-34.0667	115.017	Thylacoleonidae	Thylacoleo	carnifex	ANUA-11702	Sediment	Charcoal	ABOX-SC	ABOX	no	no	45.2	=	1.5	1S	48185	1094	Radiocarbon (ABOX)									Indirect	yes	WA	2008	Ayliffe LK, GJ Prideaux, MI Bird, R Gr¬≥n, RG Roberts, GA Gully, R Jones, LK Fifield, RG Cresswell	Age constraints on Pleistocene megafauna at Tight Entrance Cave in southwestern Australia	Quaternary Science Reviews	27:1784-1788	m	A	Tight Entrance Cave
8275	-27.9167	151.967	Thylacoleonidae	Thylacoleo	carnifex	1	Sediment	Quartz					46	=	6	1S	46000	6000	OSL					single aliquot	well	yes	yes	Indirect	yes	QLD	2001	Roberts RG, TF Flannery, LK Ayliffe, H Yoshida, JM Olley, GM Prideaux, GM Laslett, A Baynes, MA Smith, R Jones, BL Smith Hiroyuki Yoshida,1 Jon M. Olley,4 Gavin J. Prideaux,5 Geoff M. Laslett,6 Alexander Baynes,7 M. A. Smith,8 Rhys Jones,9 Barton L. Smit	New ages for the last Australian megafauna: continent-wide extinction about 46,000 years ago	Science	292:1888-1892	m	A	Ned's Gully
8277	-27.9167	151.967	Thylacoleonidae	Thylacoleo	carnifex	1	Sediment	Quartz					47	=	6	1S	47000	6000	OSL					single aliquot	well	yes	yes	Indirect	yes	QLD	2001	Roberts RG, TF Flannery, LK Ayliffe, H Yoshida, JM Olley, GM Prideaux, GM Laslett, A Baynes, MA Smith, R Jones, BL Smith Hiroyuki Yoshida,1 Jon M. Olley,4 Gavin J. Prideaux,5 Geoff M. Laslett,6 Alexander Baynes,7 M. A. Smith,8 Rhys Jones,9 Barton L. Smit	New ages for the last Australian megafauna: continent-wide extinction about 46,000 years ago	Science	292:1888-1892	m	A	Ned's Gully
8278	-34.0667	115.017	Thylacoleonidae	Thylacoleo	carnifex	TEC-F (unit G lower)	Sediment	Calcite					48.7	=	3	1S	48700	3000	U-series Th/U (ICP-MS)		yes							Indirect	yes	WA	2010	Prideaux GJ, GA Gully, AMC Couzens, LK Ayliffe, NR Jankowski, Z Jacobs, RG Roberts, J C Hellstrom, MK Gagan, and LM Hatcher	Timing and dynamics of Late Pleistocene mammal extinctions in southwestern Australia	Proceedings of the National Academy of Sciences of the USA	107(51):22157-22162	m	A	Tight Entrance Cave
8279	-34.02	141.342	Thylacoleonidae	Thylacoleo	carnifex	9 & 10	Sediment	Quartz					52	=	8	1S	52000	8000	OSL					single aliquot	well	yes	yes	Indirect	yes	NSW	2001	Roberts RG, TF Flannery, LK Ayliffe, H Yoshida, JM Olley, GM Prideaux, GM Laslett, A Baynes, MA Smith, R Jones, BL Smith Hiroyuki Yoshida,1 Jon M. Olley,4 Gavin J. Prideaux,5 Geoff M. Laslett,6 Alexander Baynes,7 M. A. Smith,8 Rhys Jones,9 Barton L. Smit	New ages for the last Australian megafauna: continent-wide extinction about 46,000 years ago	Science	292:1888-1892	m	A	Lake Victoria
8280	-34.02	141.342	Thylacoleonidae	Thylacoleo	carnifex	10	Sediment	Quartz					54	=	7	1S	54000	7000	OSL					single aliquot	well	yes	yes	Indirect	yes	NSW	2001	Roberts RG, TF Flannery, LK Ayliffe, H Yoshida, JM Olley, GM Prideaux, GM Laslett, A Baynes, MA Smith, R Jones, BL Smith Hiroyuki Yoshida,1 Jon M. Olley,4 Gavin J. Prideaux,5 Geoff M. Laslett,6 Alexander Baynes,7 M. A. Smith,8 Rhys Jones,9 Barton L. Smit	New ages for the last Australian megafauna: continent-wide extinction about 46,000 years ago	Science	292:1888-1892	m	A	Lake Victoria
8282	-40.8	145.13	Thylacoleonidae	Thylacoleo	carnifex	ST-1	Sediment	Quartz					56	=	4	1S	56000	4000	OSL					multi aliquot	well	yes	yes	Indirect	yes	TAS	2008	Turney CSM, Flannery TF, Roberts RG	Late-surviving megafauna in Tasmania, Australia, implicate human involvement in their extinction	Proceedings of the National Academy of Sciences of the USA	105(34):12150-12153	m	A	Scotchtown Cave
8283	-34.0667	115.02	Thylacoleonidae	Thylacoleo	carnifex	24	Sediment	Quartz					63	=	9	1S	63000	9000	OSL					single aliquot	well	yes	yes	Indirect	yes	WA	2001	Roberts RG, TF Flannery, LK Ayliffe, H Yoshida, JM Olley, GM Prideaux, GM Laslett, A Baynes, MA Smith, R Jones, BL Smith Hiroyuki Yoshida,1 Jon M. Olley,4 Gavin J. Prideaux,5 Geoff M. Laslett,6 Alexander Baynes,7 M. A. Smith,8 Rhys Jones,9 Barton L. Smit	New ages for the last Australian megafauna: continent-wide extinction about 46,000 years ago	Science	292:1888-1892	m	A	Mammoth Cave
8284	-37.0472	140.804	Thylacoleonidae	Thylacoleo	carnifex	GH09-2	Sediment	Quartz					70	=	6	2S	70000	6000	OSL					single grain	partially	yes	no	Indirect	yes	SA	2012	Macken AC, GJ Prideaux, EH Reed	Variation and pattern in the responses of mammal faunas to Late Pleistocene climatic change in southeastern South Australia	Journal of Quaternary Science	27(4):415-424	m	A	Victoria Fossil Cave
8285	-34.0667	115.017	Thylacoleonidae	Thylacoleo	carnifex	TEC‚ÄìF	Sediment	Quartz					70	=	4	1S	70000	4000	OSL					single grain	partially	yes	no	Indirect	yes	WA	2010	Prideaux GJ, GA Gully, AMC Couzens, LK Ayliffe, NR Jankowski, Z Jacobs, RG Roberts, J C Hellstrom, MK Gagan, and LM Hatcher	Timing and dynamics of Late Pleistocene mammal extinctions in southwestern Australia	Proceedings of the National Academy of Sciences of the USA	107(51):22157-22162	m	A	Tight Entrance Cave
8286	-34.0667	115.02	Thylacoleonidae	Thylacoleo	carnifex	24	Sediment	Sediment					74	=	10	1S	74000	10000	OSL					single aliquot	well	yes	yes	Indirect	yes	WA	2001	Roberts RG, TF Flannery, LK Ayliffe, H Yoshida, JM Olley, GM Prideaux, GM Laslett, A Baynes, MA Smith, R Jones, BL Smith Hiroyuki Yoshida,1 Jon M. Olley,4 Gavin J. Prideaux,5 Geoff M. Laslett,6 Alexander Baynes,7 M. A. Smith,8 Rhys Jones,9 Barton L. Smit	New ages for the last Australian megafauna: continent-wide extinction about 46,000 years ago	Science	292:1888-1892	m	A	Mammoth Cave
8287	-37.0472	140.804	Thylacoleonidae	Thylacoleo	carnifex	GH09-4	Sediment	Quartz					77	=	6	2S	77000	6000	OSL					single grain	partially	yes	no	Indirect	yes	SA	2012	Macken AC, GJ Prideaux, EH Reed	Variation and pattern in the responses of mammal faunas to Late Pleistocene climatic change in southeastern South Australia	Journal of Quaternary Science	27(4):415-424	m	A	Victoria Fossil Cave
8288	-37.0472	140.804	Thylacoleonidae	Thylacoleo	carnifex	GH09-3	Sediment	Quartz					82	=	8	2S	82000	8000	OSL					single grain	partially	yes	no	Indirect	yes	SA	2012	Macken AC, GJ Prideaux, EH Reed	Variation and pattern in the responses of mammal faunas to Late Pleistocene climatic change in southeastern South Australia	Journal of Quaternary Science	27(4):415-424	m	A	Victoria Fossil Cave
8289	-38.173	143.163	Thylacoleonidae	Thylacoleo	carnifex	16	Sediment	Quartz					82	=	10	1S	82000	10000	OSL					single aliquot	well	yes	yes	Indirect	yes	VIC	2001	Roberts RG, TF Flannery, LK Ayliffe, H Yoshida, JM Olley, GM Prideaux, GM Laslett, A Baynes, MA Smith, R Jones, BL Smith Hiroyuki Yoshida,1 Jon M. Olley,4 Gavin J. Prideaux,5 Geoff M. Laslett,6 Alexander Baynes,7 M. A. Smith,8 Rhys Jones,9 Barton L. Smit	New ages for the last Australian megafauna: continent-wide extinction about 46,000 years ago	Science	292:1888-1892	m	A	Lake Colongulac
8291	-42.5333	146.45	Thylacoleonidae	Thylacoleo	carnifex	JF-155	Sediment	Quartz					103	=	9	1S	103000	9000	OSL					multi aliquot	well	yes	yes	Indirect	yes	TAS	2008	Turney CSM, Flannery TF, Roberts RG	Late-surviving megafauna in Tasmania, Australia, implicate human involvement in their extinction	Proceedings of the National Academy of Sciences of the USA	105(34):12150-12153	m	A	Un-named Cave
8292	-27.95	151.733	Thylacoleonidae	Thylacoleo	carnifex	Ris√∏-060701	Sediment	Quartz					107	=	18	2S	107000	18000	OSL					single aliquot	well	yes	yes	Indirect	yes	QLD	2011	Price GJ, Webb GE, Zhao J-X, Feng Y-X, Murray AS Bernard N. Cooke b, Scott A. Hocknull e, Ian H. Sobbe	Dating megafaunal extinction on the Pleistocene Darling Downs, eastern Australia: the promise and pitfalls of dating as a test of extinction hypotheses	Quaternary Science Reviews	30:899-914	m	A	QML796
8293	-34.0667	115.017	Thylacoleonidae	Thylacoleo	carnifex	TEC-F	Sediment	Calcite					112	=	11	1S	112000	11000	U-series Th/U (ICP-MS)		yes							Indirect	yes	WA	2010	Prideaux GJ, GA Gully, AMC Couzens, LK Ayliffe, NR Jankowski, Z Jacobs, RG Roberts, J C Hellstrom, MK Gagan, and LM Hatcher	Timing and dynamics of Late Pleistocene mammal extinctions in southwestern Australia	Proceedings of the National Academy of Sciences of the USA	107(51):22157-22162	m	A	Tight Entrance Cave
8294	-34.0667	115.017	Thylacoleonidae	Thylacoleo	carnifex	TE-FS-21a	Flowstone	Calcite					119.5	=	3.7	1S	119500	3700	U-series Th/U (TIMS)		yes							Indirect	yes	WA	2008	Ayliffe LK, GJ Prideaux, MI Bird, R Gr¬≥n, RG Roberts, GA Gully, R Jones, LK Fifield, RG Cresswell	Age constraints on Pleistocene megafauna at Tight Entrance Cave in southwestern Australia	Quaternary Science Reviews	27:1784-1788	m	A	Tight Entrance Cave
8295	-27.95	151.733	Thylacoleonidae	Thylacoleo	carnifex	Ris√∏-060702	Sediment	Quartz					122	=	22	2S	122000	22000	OSL					single aliquot	well	yes	yes	Indirect	yes	QLD	2011	Price GJ, Webb GE, Zhao J-X, Feng Y-X, Murray AS Bernard N. Cooke b, Scott A. Hocknull e, Ian H. Sobbe	Dating megafaunal extinction on the Pleistocene Darling Downs, eastern Australia: the promise and pitfalls of dating as a test of extinction hypotheses	Quaternary Science Reviews	30:899-914	m	A	QML796
8296	-34.0667	115.017	Thylacoleonidae	Thylacoleo	carnifex	TEC07‚Äì1	Sediment	Quartz					135	=	7	1S	135000	7000	OSL					single grain	well	yes	yes	Indirect	yes	WA	2010	Prideaux GJ, GA Gully, AMC Couzens, LK Ayliffe, NR Jankowski, Z Jacobs, RG Roberts, J C Hellstrom, MK Gagan, and LM Hatcher	Timing and dynamics of Late Pleistocene mammal extinctions in southwestern Australia	Proceedings of the National Academy of Sciences of the USA	107(51):22157-22162	m	A	Tight Entrance Cave
8297	-34.0667	115.017	Thylacoleonidae	Thylacoleo	carnifex	TE-FS-UG	Flowstone	Calcite					136.8	=	2.6	1S	136800	2600	U-series Th/U (TIMS)		yes							Indirect	yes	WA	2008	Ayliffe LK, GJ Prideaux, MI Bird, R Gr¬≥n, RG Roberts, GA Gully, R Jones, LK Fifield, RG Cresswell	Age constraints on Pleistocene megafauna at Tight Entrance Cave in southwestern Australia	Quaternary Science Reviews	27:1784-1788	m	A	Tight Entrance Cave
8299	-34.0667	115.017	Thylacoleonidae	Thylacoleo	carnifex	TEC-97	Sediment	Calcite					151	=	7	1S	151000	7000	U-series Th/U (ICP-MS)		yes							Indirect	yes	WA	2010	Prideaux GJ, GA Gully, AMC Couzens, LK Ayliffe, NR Jankowski, Z Jacobs, RG Roberts, J C Hellstrom, MK Gagan, and LM Hatcher	Timing and dynamics of Late Pleistocene mammal extinctions in southwestern Australia	Proceedings of the National Academy of Sciences of the USA	107(51):22157-22162	m	A	Tight Entrance Cave
8300	-37.0472	140.804	Thylacoleonidae	Thylacoleo	carnifex	19	Sediment	Quartz					164	=	15	1S	164000	15000	OSL					single aliquot	well	yes	yes	Indirect	yes	SA	2001	Roberts RG, TF Flannery, LK Ayliffe, H Yoshida, JM Olley, GM Prideaux, GM Laslett, A Baynes, MA Smith, R Jones, BL Smith Hiroyuki Yoshida,1 Jon M. Olley,4 Gavin J. Prideaux,5 Geoff M. Laslett,6 Alexander Baynes,7 M. A. Smith,8 Rhys Jones,9 Barton L. Smit	New ages for the last Australian megafauna: continent-wide extinction about 46,000 years ago	Science	292:1888-1892	m	A	Victoria Fossil Cave
8301	-37.0333	140.8	Thylacoleonidae	Thylacoleo	carnifex	NC1	Sediment	Quartz					206	=	16	2S	206000	16000	OSL					single aliquot	well	yes	yes	Indirect	yes	SA	2007	Prideaux GJ, RG Roberts, D Megirian, KE Westaway, JC Hellstrom, JM Olley	Mammalian responses to Pleistocene climate change in southeastern Australia	Geology	35(1):33-36	m	A	Cathedral Cave
8302	-37.0333	140.8	Thylacoleonidae	Thylacoleo	carnifex	NC2	Sediment	Quartz					231	=	21	2S	231000	21000	OSL					single aliquot	well	yes	yes	Indirect	yes	SA	2007	Prideaux GJ, RG Roberts, D Megirian, KE Westaway, JC Hellstrom, JM Olley	Mammalian responses to Pleistocene climate change in southeastern Australia	Geology	35(1):33-36	m	A	Cathedral Cave
8303	-37.0333	140.8	Thylacoleonidae	Thylacoleo	carnifex	NC3	Sediment	Quartz					257	=	21	2S	257000	21000	OSL					single aliquot	well	yes	yes	Indirect	yes	SA	2007	Prideaux GJ, RG Roberts, D Megirian, KE Westaway, JC Hellstrom, JM Olley	Mammalian responses to Pleistocene climate change in southeastern Australia	Geology	35(1):33-36	m	A	Cathedral Cave
8306	-37.0333	140.8	Thylacoleonidae	Thylacoleo	carnifex	NC4	Sediment	Quartz					292	=	19	2S	292000	19000	OSL					single aliquot	well	yes	yes	Indirect	yes	SA	2007	Prideaux GJ, RG Roberts, D Megirian, KE Westaway, JC Hellstrom, JM Olley	Mammalian responses to Pleistocene climate change in southeastern Australia	Geology	35(1):33-36	m	A	Cathedral Cave
8307	-37.0333	140.8	Thylacoleonidae	Thylacoleo	carnifex	NCF1-3 mid	Flowstone	Calcite					297	=	9	2S	297000	9000	U-series Th/U (ICP-MS)	yes	yes							Indirect	yes	SA	2007	Prideaux GJ, RG Roberts, D Megirian, KE Westaway, JC Hellstrom, JM Olley	Mammalian responses to Pleistocene climate change in southeastern Australia	Geology	35(1):33-36	m	A	Cathedral Cave
8309	-37.0333	140.8	Thylacoleonidae	Thylacoleo	carnifex	NC5	Sediment	Quartz					513	=	73	2S	513000	73000	OSL					single aliquot	well	yes	yes	Indirect	yes	SA	2007	Prideaux GJ, RG Roberts, D Megirian, KE Westaway, JC Hellstrom, JM Olley	Mammalian responses to Pleistocene climate change in southeastern Australia	Geology	35(1):33-36	m	A	Cathedral Cave
8310	-37.0333	140.8	Thylacoleonidae	Thylacoleo	carnifex	NC6	Sediment	Quartz					535	=	49	2S	535000	49000	OSL					single aliquot	well	yes	yes	Indirect	yes	SA	2007	Prideaux GJ, RG Roberts, D Megirian, KE Westaway, JC Hellstrom, JM Olley	Mammalian responses to Pleistocene climate change in southeastern Australia	Geology	35(1):33-36	m	A	Cathedral Cave
8372	-35.9495	136.735	Thylacoleonidae	Thylacoleo	species indet.	2165A	Tooth	Enamel					50	=	4	1S	50000	4000	CSUS-ESR									Direct		SA	2008	Gr√ºn R, Wells R, Eggins S, Spooner N, Aubert M, Brown L, Rhodes E	Electron spin resonance dating of South Australian megafauna sites	Australian Journal of Earth Sciences	55:917-935	m*	A*	Black Creek Swamp
8746	-27.95	151.733	Macropodidae	Troposodon	minor	Ris√∏-060701	Sediment	Quartz					107	=	18	2S	107000	18000	OSL					single aliquot	well	yes	yes	Indirect	yes	QLD	2011	Price GJ, Webb GE, Zhao J-X, Feng Y-X, Murray AS Bernard N. Cooke b, Scott A. Hocknull e, Ian H. Sobbe	Dating megafaunal extinction on the Pleistocene Darling Downs, eastern Australia: the promise and pitfalls of dating as a test of extinction hypotheses	Quaternary Science Reviews	30:899-914	m	A	QML796
8747	-27.95	151.733	Macropodidae	Troposodon	minor	Ris√∏-060702	Sediment	Quartz					122	=	22	2S	122000	22000	OSL					single aliquot	well	yes	yes	Indirect	yes	QLD	2011	Price GJ, Webb GE, Zhao J-X, Feng Y-X, Murray AS Bernard N. Cooke b, Scott A. Hocknull e, Ian H. Sobbe	Dating megafaunal extinction on the Pleistocene Darling Downs, eastern Australia: the promise and pitfalls of dating as a test of extinction hypotheses	Quaternary Science Reviews	30:899-914	m	A	QML796
9123	-34.0667	115.02	Tachyglossidae	Zaglossus	hacketti	24	Sediment	Quartz					63	=	9	1S	63000	9000	OSL					single aliquot	well	yes	yes	Indirect	yes	WA	2001	Roberts RG, TF Flannery, LK Ayliffe, H Yoshida, JM Olley, GM Prideaux, GM Laslett, A Baynes, MA Smith, R Jones, BL Smith Hiroyuki Yoshida,1 Jon M. Olley,4 Gavin J. Prideaux,5 Geoff M. Laslett,6 Alexander Baynes,7 M. A. Smith,8 Rhys Jones,9 Barton L. Smit	New ages for the last Australian megafauna: continent-wide extinction about 46,000 years ago	Science	292:1888-1892	m	A	Mammoth Cave
9124	-34.0667	115.02	Tachyglossidae	Zaglossus	hacketti	24	Sediment	Sediment					74	=	10	1S	74000	10000	OSL					single aliquot	well	yes	yes	Indirect	yes	WA	2001	Roberts RG, TF Flannery, LK Ayliffe, H Yoshida, JM Olley, GM Prideaux, GM Laslett, A Baynes, MA Smith, R Jones, BL Smith Hiroyuki Yoshida,1 Jon M. Olley,4 Gavin J. Prideaux,5 Geoff M. Laslett,6 Alexander Baynes,7 M. A. Smith,8 Rhys Jones,9 Barton L. Smit	New ages for the last Australian megafauna: continent-wide extinction about 46,000 years ago	Science	292:1888-1892	m	A	Mammoth Cave
9156	-34.0667	115.017	Diprotodontidae	Zygomaturus	trilobus	TEC-F (WAM 07.6.147)	Sediment	Calcite					44.9	=	1.3	1S	44900	1300	U-series Th/U (ICP-MS)		yes							Indirect	yes	WA	2010	Prideaux GJ, GA Gully, AMC Couzens, LK Ayliffe, NR Jankowski, Z Jacobs, RG Roberts, J C Hellstrom, MK Gagan, and LM Hatcher	Timing and dynamics of Late Pleistocene mammal extinctions in southwestern Australia	Proceedings of the National Academy of Sciences of the USA	107(51):22157-22162	m	A	Tight Entrance Cave
9159	-34.0667	115.017	Diprotodontidae	Zygomaturus	trilobus	TEC-F (unit G lower)	Sediment	Calcite					48.7	=	3	1S	48700	3000	U-series Th/U (ICP-MS)		yes							Indirect	yes	WA	2010	Prideaux GJ, GA Gully, AMC Couzens, LK Ayliffe, NR Jankowski, Z Jacobs, RG Roberts, J C Hellstrom, MK Gagan, and LM Hatcher	Timing and dynamics of Late Pleistocene mammal extinctions in southwestern Australia	Proceedings of the National Academy of Sciences of the USA	107(51):22157-22162	m	A	Tight Entrance Cave
9161	-40.8	145.13	Diprotodontidae	Zygomaturus	trilobus	ST-1	Sediment	Quartz					56	=	4	1S	56000	4000	OSL					multi aliquot	well	yes	yes	Indirect	yes	TAS	2008	Turney CSM, Flannery TF, Roberts RG	Late-surviving megafauna in Tasmania, Australia, implicate human involvement in their extinction	Proceedings of the National Academy of Sciences of the USA	105(34):12150-12153	m	A	Scotchtown Cave
9162	-34.0667	115.02	Diprotodontidae	Zygomaturus	trilobus	24	Sediment	Quartz					63	=	9	1S	63000	9000	OSL					single aliquot	well	yes	yes	Indirect	yes	WA	2001	Roberts RG, TF Flannery, LK Ayliffe, H Yoshida, JM Olley, GM Prideaux, GM Laslett, A Baynes, MA Smith, R Jones, BL Smith Hiroyuki Yoshida,1 Jon M. Olley,4 Gavin J. Prideaux,5 Geoff M. Laslett,6 Alexander Baynes,7 M. A. Smith,8 Rhys Jones,9 Barton L. Smit	New ages for the last Australian megafauna: continent-wide extinction about 46,000 years ago	Science	292:1888-1892	m	A	Mammoth Cave
9163	-37.0472	140.804	Diprotodontidae	Zygomaturus	trilobus	GH09-2	Sediment	Quartz					70	=	6	2S	70000	6000	OSL					single grain	partially	yes	no	Indirect	yes	SA	2012	Macken AC, GJ Prideaux, EH Reed	Variation and pattern in the responses of mammal faunas to Late Pleistocene climatic change in southeastern South Australia	Journal of Quaternary Science	27(4):415-424	m	A	Victoria Fossil Cave
9164	-34.0667	115.017	Diprotodontidae	Zygomaturus	trilobus	TEC‚ÄìF	Sediment	Quartz					70	=	4	1S	70000	4000	OSL					single grain	partially	yes	no	Indirect	yes	WA	2010	Prideaux GJ, GA Gully, AMC Couzens, LK Ayliffe, NR Jankowski, Z Jacobs, RG Roberts, J C Hellstrom, MK Gagan, and LM Hatcher	Timing and dynamics of Late Pleistocene mammal extinctions in southwestern Australia	Proceedings of the National Academy of Sciences of the USA	107(51):22157-22162	m	A	Tight Entrance Cave
9165	-34.0667	115.02	Diprotodontidae	Zygomaturus	trilobus	24	Sediment	Sediment					74	=	10	1S	74000	10000	OSL					single aliquot	well	yes	yes	Indirect	yes	WA	2001	Roberts RG, TF Flannery, LK Ayliffe, H Yoshida, JM Olley, GM Prideaux, GM Laslett, A Baynes, MA Smith, R Jones, BL Smith Hiroyuki Yoshida,1 Jon M. Olley,4 Gavin J. Prideaux,5 Geoff M. Laslett,6 Alexander Baynes,7 M. A. Smith,8 Rhys Jones,9 Barton L. Smit	New ages for the last Australian megafauna: continent-wide extinction about 46,000 years ago	Science	292:1888-1892	m	A	Mammoth Cave
9167	-37.0472	140.804	Diprotodontidae	Zygomaturus	trilobus	GH09-4	Sediment	Quartz					77	=	6	2S	77000	6000	OSL					single grain	partially	yes	no	Indirect	yes	SA	2012	Macken AC, GJ Prideaux, EH Reed	Variation and pattern in the responses of mammal faunas to Late Pleistocene climatic change in southeastern South Australia	Journal of Quaternary Science	27(4):415-424	m	A	Victoria Fossil Cave
9168	-37.0472	140.804	Diprotodontidae	Zygomaturus	trilobus	GH09-3	Sediment	Quartz					82	=	8	2S	82000	8000	OSL					single grain	partially	yes	no	Indirect	yes	SA	2012	Macken AC, GJ Prideaux, EH Reed	Variation and pattern in the responses of mammal faunas to Late Pleistocene climatic change in southeastern South Australia	Journal of Quaternary Science	27(4):415-424	m	A	Victoria Fossil Cave
9169	-38.173	143.163	Diprotodontidae	Zygomaturus	trilobus	16	Sediment	Quartz					82	=	10	1S	82000	10000	OSL					single aliquot	well	yes	yes	Indirect	yes	VIC	2001	Roberts RG, TF Flannery, LK Ayliffe, H Yoshida, JM Olley, GM Prideaux, GM Laslett, A Baynes, MA Smith, R Jones, BL Smith Hiroyuki Yoshida,1 Jon M. Olley,4 Gavin J. Prideaux,5 Geoff M. Laslett,6 Alexander Baynes,7 M. A. Smith,8 Rhys Jones,9 Barton L. Smit	New ages for the last Australian megafauna: continent-wide extinction about 46,000 years ago	Science	292:1888-1892	m	A	Lake Colongulac
9171	-34.0667	115.017	Diprotodontidae	Zygomaturus	trilobus	TEC-F	Sediment	Calcite					112	=	11	1S	112000	11000	U-series Th/U (ICP-MS)		yes							Indirect	yes	WA	2010	Prideaux GJ, GA Gully, AMC Couzens, LK Ayliffe, NR Jankowski, Z Jacobs, RG Roberts, J C Hellstrom, MK Gagan, and LM Hatcher	Timing and dynamics of Late Pleistocene mammal extinctions in southwestern Australia	Proceedings of the National Academy of Sciences of the USA	107(51):22157-22162	m	A	Tight Entrance Cave
9172	-34.0667	115.017	Diprotodontidae	Zygomaturus	trilobus	TE-FS-21a	Flowstone	Calcite					119.5	=	3.7	1S	119500	3700	U-series Th/U (TIMS)		yes							Indirect	yes	WA	2008	Ayliffe LK, GJ Prideaux, MI Bird, R Gr¬≥n, RG Roberts, GA Gully, R Jones, LK Fifield, RG Cresswell	Age constraints on Pleistocene megafauna at Tight Entrance Cave in southwestern Australia	Quaternary Science Reviews	27:1784-1788	m	A	Tight Entrance Cave
9173	-27.95	151.733	Diprotodontidae	Zygomaturus	trilobus	Ris√∏-060702	Sediment	Quartz					122	=	22	2S	122000	22000	OSL					single aliquot	well	yes	yes	Indirect	yes	QLD	2011	Price GJ, Webb GE, Zhao J-X, Feng Y-X, Murray AS Bernard N. Cooke b, Scott A. Hocknull e, Ian H. Sobbe	Dating megafaunal extinction on the Pleistocene Darling Downs, eastern Australia: the promise and pitfalls of dating as a test of extinction hypotheses	Quaternary Science Reviews	30:899-914	m	A	QML796
9174	-34.2725	115.096	Diprotodontidae	Zygomaturus	trilobus	25	Sediment	Quartz					131	=	14	1S	131000	14000	OSL					single aliquot	well	yes	yes	Indirect	yes	WA	2001	Roberts RG, TF Flannery, LK Ayliffe, H Yoshida, JM Olley, GM Prideaux, GM Laslett, A Baynes, MA Smith, R Jones, BL Smith Hiroyuki Yoshida,1 Jon M. Olley,4 Gavin J. Prideaux,5 Geoff M. Laslett,6 Alexander Baynes,7 M. A. Smith,8 Rhys Jones,9 Barton L. Smit	New ages for the last Australian megafauna: continent-wide extinction about 46,000 years ago	Science	292:1888-1892	m	A	Moondyne Cave
9175	-34.0667	115.017	Diprotodontidae	Zygomaturus	trilobus	TEC07‚Äì1	Sediment	Quartz					135	=	7	1S	135000	7000	OSL					single grain	well	yes	yes	Indirect	yes	WA	2010	Prideaux GJ, GA Gully, AMC Couzens, LK Ayliffe, NR Jankowski, Z Jacobs, RG Roberts, J C Hellstrom, MK Gagan, and LM Hatcher	Timing and dynamics of Late Pleistocene mammal extinctions in southwestern Australia	Proceedings of the National Academy of Sciences of the USA	107(51):22157-22162	m	A	Tight Entrance Cave
9176	-34.0667	115.017	Diprotodontidae	Zygomaturus	trilobus	TE-FS-UG	Flowstone	Calcite					136.8	=	2.6	1S	136800	2600	U-series Th/U (TIMS)		yes							Indirect	yes	WA	2008	Ayliffe LK, GJ Prideaux, MI Bird, R Gr¬≥n, RG Roberts, GA Gully, R Jones, LK Fifield, RG Cresswell	Age constraints on Pleistocene megafauna at Tight Entrance Cave in southwestern Australia	Quaternary Science Reviews	27:1784-1788	m	A	Tight Entrance Cave
9178	-34.0667	115.017	Diprotodontidae	Zygomaturus	trilobus	TEC-97	Sediment	Calcite					151	=	7	1S	151000	7000	U-series Th/U (ICP-MS)		yes							Indirect	yes	WA	2010	Prideaux GJ, GA Gully, AMC Couzens, LK Ayliffe, NR Jankowski, Z Jacobs, RG Roberts, J C Hellstrom, MK Gagan, and LM Hatcher	Timing and dynamics of Late Pleistocene mammal extinctions in southwestern Australia	Proceedings of the National Academy of Sciences of the USA	107(51):22157-22162	m	A	Tight Entrance Cave
9179	-37.0472	140.804	Diprotodontidae	Zygomaturus	trilobus	19	Sediment	Quartz					164	=	15	1S	164000	15000	OSL					single aliquot	well	yes	yes	Indirect	yes	SA	2001	Roberts RG, TF Flannery, LK Ayliffe, H Yoshida, JM Olley, GM Prideaux, GM Laslett, A Baynes, MA Smith, R Jones, BL Smith Hiroyuki Yoshida,1 Jon M. Olley,4 Gavin J. Prideaux,5 Geoff M. Laslett,6 Alexander Baynes,7 M. A. Smith,8 Rhys Jones,9 Barton L. Smit	New ages for the last Australian megafauna: continent-wide extinction about 46,000 years ago	Science	292:1888-1892	m	A	Victoria Fossil Cave
9180	-37.0333	140.8	Diprotodontidae	Zygomaturus	trilobus	NC1	Sediment	Quartz					206	=	16	2S	206000	16000	OSL					single aliquot	well	yes	yes	Indirect	yes	SA	2007	Prideaux GJ, RG Roberts, D Megirian, KE Westaway, JC Hellstrom, JM Olley	Mammalian responses to Pleistocene climate change in southeastern Australia	Geology	35(1):33-36	m	A	Cathedral Cave
9181	-37.0333	140.8	Diprotodontidae	Zygomaturus	trilobus	NC2	Sediment	Quartz					231	=	21	2S	231000	21000	OSL					single aliquot	well	yes	yes	Indirect	yes	SA	2007	Prideaux GJ, RG Roberts, D Megirian, KE Westaway, JC Hellstrom, JM Olley	Mammalian responses to Pleistocene climate change in southeastern Australia	Geology	35(1):33-36	m	A	Cathedral Cave
9182	-37.0333	140.8	Diprotodontidae	Zygomaturus	trilobus	NC3	Sediment	Quartz					257	=	21	2S	257000	21000	OSL					single aliquot	well	yes	yes	Indirect	yes	SA	2007	Prideaux GJ, RG Roberts, D Megirian, KE Westaway, JC Hellstrom, JM Olley	Mammalian responses to Pleistocene climate change in southeastern Australia	Geology	35(1):33-36	m	A	Cathedral Cave
9185	-37.0333	140.8	Diprotodontidae	Zygomaturus	trilobus	NC4	Sediment	Quartz					292	=	19	2S	292000	19000	OSL					single aliquot	well	yes	yes	Indirect	yes	SA	2007	Prideaux GJ, RG Roberts, D Megirian, KE Westaway, JC Hellstrom, JM Olley	Mammalian responses to Pleistocene climate change in southeastern Australia	Geology	35(1):33-36	m	A	Cathedral Cave
9186	-37.0333	140.8	Diprotodontidae	Zygomaturus	trilobus	NCF1-3 mid	Flowstone	Calcite					297	=	9	2S	297000	9000	U-series Th/U (ICP-MS)	yes	yes							Indirect	yes	SA	2007	Prideaux GJ, RG Roberts, D Megirian, KE Westaway, JC Hellstrom, JM Olley	Mammalian responses to Pleistocene climate change in southeastern Australia	Geology	35(1):33-36	m	A	Cathedral Cave
9188	-37.0333	140.8	Diprotodontidae	Zygomaturus	trilobus	NC5	Sediment	Quartz					513	=	73	2S	513000	73000	OSL					single aliquot	well	yes	yes	Indirect	yes	SA	2007	Prideaux GJ, RG Roberts, D Megirian, KE Westaway, JC Hellstrom, JM Olley	Mammalian responses to Pleistocene climate change in southeastern Australia	Geology	35(1):33-36	m	A	Cathedral Cave
9189	-37.0333	140.8	Diprotodontidae	Zygomaturus	trilobus	NC6	Sediment	Quartz					535	=	49	2S	535000	49000	OSL					single aliquot	well	yes	yes	Indirect	yes	SA	2007	Prideaux GJ, RG Roberts, D Megirian, KE Westaway, JC Hellstrom, JM Olley	Mammalian responses to Pleistocene climate change in southeastern Australia	Geology	35(1):33-36	m	A	Cathedral Cave
9191	-37.0472	140.804	Diprotodontidae	Zygomaturus	trilobus	1366A	tooth	Dentine/enamel					128	=	12	1S	128000	12000	CSUS-ESR				in situ					Direct		SA	2001	Gr√ºn R, K Moriarty, R Wells	Electron spin resonance dating of the fossil deposits in the Naracoorte Caves, South Australia	Journal of Quaternary Science	16(1): 49-59	m*	A*	Victoria Fossil Cave
9193	-37.0472	140.804	Diprotodontidae	Zygomaturus	trilobus	1360B	Tooth	Enamel					239	=	26	1S	239000	26000	US-ESR				in situ					Direct		SA	2001	Gr√ºn R, K Moriarty, R Wells	Electron spin resonance dating of the fossil deposits in the Naracoorte Caves, South Australia	Journal of Quaternary Science	16(1): 49-59	m	A	Victoria Fossil Cave
9195	-37.0472	140.804	Diprotodontidae	Zygomaturus	trilobus	1369B2	Tooth	Enamel					439	=	56	1S	439000	56000	CSUS-ESR				in situ					Direct		SA	2001	Gr√ºn R, K Moriarty, R Wells	Electron spin resonance dating of the fossil deposits in the Naracoorte Caves, South Australia	Journal of Quaternary Science	16(1): 49-59	m*	A*	Victoria Fossil Cave
9627	-23.338	113.849	Dromornithidae	Genyornis	newtoni	AdGL11077	Sediment	Quartz					53.6	=	4.4	1S	53600	4400	OSL					single aliquot	well		yes	Indirect	yes	WA	2016	Miller G, Magee J, Smith M, Spooner N, Baynes A, Lehmann S, Fogel M, Johnston H, Williams D, Clark P, Florian C, Holst R, DeVogel S	Human predation contributed to the extinction of the Australian megafaunal bird Genyornis newtoni B47 ka	Nature Communications	7:10496	m	A	Fabulous
9628	-23.4554	113.79	Dromornithidae	Genyornis	newtoni	AdBL10017	Sediment	Quartz					47.9	=	2.3	1S	47900	2300	OSL					single aliquot	well		yes	Indirect	yes	WA	2016	Miller G, Magee J, Smith M, Spooner N, Baynes A, Lehmann S, Fogel M, Johnston H, Williams D, Clark P, Florian C, Holst R, DeVogel S	Human predation contributed to the extinction of the Australian megafaunal bird Genyornis newtoni B47 ka	Nature Communications	7:10496	m	A	Z-Blowout
9629	-23.4321	113.82	Dromornithidae	Genyornis	newtoni	AdGL11078	Sediment	Quartz					45.3	=	3.5	1S	45300	3500	OSL					single aliquot	well		yes	Indirect	yes	WA	2016	Miller G, Magee J, Smith M, Spooner N, Baynes A, Lehmann S, Fogel M, Johnston H, Williams D, Clark P, Florian C, Holst R, DeVogel S	Human predation contributed to the extinction of the Australian megafaunal bird Genyornis newtoni B47 ka	Nature Communications	7:10496	m	A	12-Mile
9630	-24.2798	113.409	Dromornithidae	Genyornis	newtoni	AdGL11082	Sediment	Quartz					47.2	=	3.5	1S	47200	3500	OSL					single aliquot	well		yes	Indirect	yes	WA	2016	Miller G, Magee J, Smith M, Spooner N, Baynes A, Lehmann S, Fogel M, Johnston H, Williams D, Clark P, Florian C, Holst R, DeVogel S	Human predation contributed to the extinction of the Australian megafaunal bird Genyornis newtoni B47 ka	Nature Communications	7:10496	m	A	Sunset-1
9631	-29.0404	137.627	Dromornithidae	Genyornis	newtoni	ANUOD1080	Sediment	Quartz					50.8	=	3.3	1S	50800	3300	OSL					single aliquot	well		yes	Indirect	yes	SA	2016	Miller G, Magee J, Smith M, Spooner N, Baynes A, Lehmann S, Fogel M, Johnston H, Williams D, Clark P, Florian C, Holst R, DeVogel S	Human predation contributed to the extinction of the Australian megafaunal bird Genyornis newtoni B47 ka	Nature Communications	7:10496	m	A	Williams Point
9633	-33.548	143.157	Dromornithidae	Genyornis	newtoni	Adl2100	Sediment	Quartz					43.1	=	1.6	1S	43100	1600	OSL					single aliquot	well		yes	Indirect	yes	NSW	2016	Miller G, Magee J, Smith M, Spooner N, Baynes A, Lehmann S, Fogel M, Johnston H, Williams D, Clark P, Florian C, Holst R, DeVogel S	Human predation contributed to the extinction of the Australian megafaunal bird Genyornis newtoni B47 ka	Nature Communications	7:10496	m	A	Garnpung
9650	-23.4118	113.827	Dromornithidae	Genyornis	newtoni	AdGL11079	Sediment	Quartz					47.3	=	4.9	1S	47300	4900	OSL					single aliquot	well		yes	Indirect	yes	WA	2016	Miller G, Magee J, Smith M, Spooner N, Baynes A, Lehmann S, Fogel M, Johnston H, Williams D, Clark P, Florian C, Holst R, DeVogel S	Human predation contributed to the extinction of the Australian megafaunal bird Genyornis newtoni B47 ka	Nature Communications	7:10496	m	A	11-Mile
9651	-24.2798	113.407	Dromornithidae	Genyornis	newtoni	AdGL11081	Sediment	Quartz					52.1	=	4.8	1S	52100	4800	OSL					single aliquot	well		yes	Indirect	yes	WA	2016	Miller G, Magee J, Smith M, Spooner N, Baynes A, Lehmann S, Fogel M, Johnston H, Williams D, Clark P, Florian C, Holst R, DeVogel S	Human predation contributed to the extinction of the Australian megafaunal bird Genyornis newtoni B47 ka	Nature Communications	7:10496	m	A	Sunset-2
9670	-28.143	137.542	Dromornithidae	Genyornis	newtoni	ANUOD1252	Sediment	Quartz					59.1	=	3.9	1S	59100	3900	OSL					single aliquot	well		yes	Indirect	yes	SA	2016	Miller G, Magee J, Smith M, Spooner N, Baynes A, Lehmann S, Fogel M, Johnston H, Williams D, Clark P, Florian C, Holst R, DeVogel S	Human predation contributed to the extinction of the Australian megafaunal bird Genyornis newtoni B47 ka	Nature Communications	7:10496	m	A	North Harbour
9671	-32.4753	137.708	Dromornithidae	Genyornis	newtoni	ANUOD1317	Sediment	Quartz					44.7	=	2.1	1S	44700	2100	OSL					single aliquot	well		yes	Indirect	yes	SA	2016	Miller G, Magee J, Smith M, Spooner N, Baynes A, Lehmann S, Fogel M, Johnston H, Williams D, Clark P, Florian C, Holst R, DeVogel S	Human predation contributed to the extinction of the Australian megafaunal bird Genyornis newtoni B47 ka	Nature Communications	7:10496	m	A	Cooper's Dune
9672	-32.3891	137.768	Dromornithidae	Genyornis	newtoni	ANUOD1320	Sediment	Quartz					55.5	=	2.3	1S	55500	2300	OSL					single aliquot	well		yes	Indirect	yes	SA	2016	Miller G, Magee J, Smith M, Spooner N, Baynes A, Lehmann S, Fogel M, Johnston H, Williams D, Clark P, Florian C, Holst R, DeVogel S	Human predation contributed to the extinction of the Australian megafaunal bird Genyornis newtoni B47 ka	Nature Communications	7:10496	m	A	Mystery Island Sp1
9673	-32.3901	137.768	Dromornithidae	Genyornis	newtoni	ANUOD1321	Sediment	Quartz					47.3	=	1.7	1S	47300	1700	OSL					single aliquot	well		yes	Indirect	yes	SA	2016	Miller G, Magee J, Smith M, Spooner N, Baynes A, Lehmann S, Fogel M, Johnston H, Williams D, Clark P, Florian C, Holst R, DeVogel S	Human predation contributed to the extinction of the Australian megafaunal bird Genyornis newtoni B47 ka	Nature Communications	7:10496	m	A	Mystery Island Sp2
9674	-32.4432	137.756	Dromornithidae	Genyornis	newtoni	ANUOD1313	Sediment	Quartz					55	=	3	1S	55000	3000	OSL					single aliquot	well		yes	Indirect	yes	SA	2016	Miller G, Magee J, Smith M, Spooner N, Baynes A, Lehmann S, Fogel M, Johnston H, Williams D, Clark P, Florian C, Holst R, DeVogel S	Human predation contributed to the extinction of the Australian megafaunal bird Genyornis newtoni B47 ka	Nature Communications	7:10496	m	A	Flinders North
9698	-23.4291	113.823	Dromornithidae	Genyornis	newtoni	AdBL10016	Sediment	Quartz					89	=	8	1S	89000	8000	OSL					single aliquot	well		yes	Indirect	yes	WA	2016	Miller G, Magee J, Smith M, Spooner N, Baynes A, Lehmann S, Fogel M, Johnston H, Williams D, Clark P, Florian C, Holst R, DeVogel S	Human predation contributed to the extinction of the Australian megafaunal bird Genyornis newtoni B47 ka	Nature Communications	7:10496	m	A	12-Mile
9819	-34.098	115.04	Macropodidae	Protemnodon	sp indet.	KY3	Sediment	Quartz					41.4	=	1.9	1S	41400	1900	OSL					single grain	well	yes		Indirect	yes	WA	2016	Jankowski NR, Gully GA, Jacobs Z, Roberts RG, Prideaux GJ	A late Quaternary vertebrate deposit in Kudjal Yolgah Cave, south‚Äêwestern Australia: refining regional late Pleistocene extinctions.	Journal of Quaternary Science	31: 538-550	m	A	Kudjal Yolgah Cave (Cave Number 6WI-9)
9827	-34.098	115.04	Macropodidae	Procoptodon	browneorum	KY3	Sediment	Quartz					41.4	=	1.9	1S	41400	1900	OSL					single grain	well	yes		Indirect	yes	WA	2016	Jankowski NR, Gully GA, Jacobs Z, Roberts RG, Prideaux GJ	A late Quaternary vertebrate deposit in Kudjal Yolgah Cave, south‚Äêwestern Australia: refining regional late Pleistocene extinctions.	Journal of Quaternary Science	31: 538-550	m	A	Kudjal Yolgah Cave (Cave Number 6WI-9)
10124	-31.6339	138.813	Diprotodontidae	Diprotodon	optatum	OZQ616	Eggshell	Carbonate	ABA + mechanical pore cleaning	Grinding and acid etching	No	No	44.4	=	0.6	1S	47707	740	AMS Radiocarbon									Indirect	yes	SA	2016	Hamm G, Mitchell P, Arnold LJ, Prideaux GJ, Questiaux D, Spooner NA, Levchenko VA, Foley EC, Worthy TH, Stephenson B	Cultural innovation and megafauna interaction in the early settlement of arid Australia	Nature	539: 280-283	m*	A	Warratyi Rock Shelter
10125	-31.6339	138.813	Diprotodontidae	Diprotodon	optatum	ERS-7	Sediment	Quartz					42.8	=	2.4	2S	42800	2400	OSL					single grain	well	yes	yes	Indirect	yes	SA	2016	Hamm G, Mitchell P, Arnold LJ, Prideaux GJ, Questiaux D, Spooner NA, Levchenko VA, Foley EC, Worthy TH, Stephenson B	Cultural innovation and megafauna interaction in the early settlement of arid Australia	Nature	539: 280-283	m	A	Warratyi Rock Shelter
10126	-31.6339	138.813	Diprotodontidae	Diprotodon	optatum	ERS-7	Sediment	Quartz					43.8	=	3.4	2S	43800	3400	TT-OSL					single grain	well	yes	yes	Indirect	yes	SA	2016	Hamm G, Mitchell P, Arnold LJ, Prideaux GJ, Questiaux D, Spooner NA, Levchenko VA, Foley EC, Worthy TH, Stephenson B	Cultural innovation and megafauna interaction in the early settlement of arid Australia	Nature	539: 280-283	m	A	Warratyi Rock Shelter
11876	-35.0692	138.486	Diprotodontidae	Diprotodon	species indet.	2087	Tooth	Enamel					45.5	=	6	1S	45500	6000	CSUS-ESR									Direct		SA	2008	Gr√ºn R, Wells R, Eggins S, Spooner N, Aubert M, Brown L, Rhodes E	Electron spin resonance dating of South Australian megafauna sites	Australian Journal of Earth Sciences	55:917-935	m*	A*	Hallett Cove
11894	-30.3486	147.343	Diprotodontidae	Diprotodon	species indet.	2029	Tooth	Enamel					50.7	=	6	1S	50700	6000	EU-ESR			yes	in situ					Direct		NSW	2010	Gr√ºn R, S Eggins, M Aubert, N Spooner, AWG Pike, W M√ºller.	ESR and U-series analyses of faunal material from Cuddie Springs, NSW, Australia: implications for the timing of the extinction of the Australian megafauna	Quaternary Science Reviews	29:596-610	m*	A*	Cuddie Springs
11896	-30.3486	147.343	Diprotodontidae	Diprotodon	species indet.	2036	Tooth	Enamel					659	=	77.5	1S	659000	77500	EU-ESR			yes	in situ					Direct		NSW	2010	Gr√ºn R, S Eggins, M Aubert, N Spooner, AWG Pike, W M√ºller.	ESR and U-series analyses of faunal material from Cuddie Springs, NSW, Australia: implications for the timing of the extinction of the Australian megafauna	Quaternary Science Reviews	29:596-610	m*	A*	Cuddie Springs
11897	-30.3486	147.343	Macropodidae	Protemnodon	species indet.	2038	Tooth	Enamel					50.5	=	7.5	1S	50500	7500	US-ESR			yes	in situ					Direct		NSW	2010	Gr√ºn R, S Eggins, M Aubert, N Spooner, AWG Pike, W M√ºller.	ESR and U-series analyses of faunal material from Cuddie Springs, NSW, Australia: implications for the timing of the extinction of the Australian megafauna	Quaternary Science Reviews	29:596-610	m*	A*	Cuddie Springs
11904	-30.3486	147.343	Diprotodontidae	Diprotodon	species indet.	2041	Tooth	Enamel					147.5	=	30.5	1S	147500	30500	EU-ESR			yes	in situ					Direct		NSW	2010	Gr√ºn R, S Eggins, M Aubert, N Spooner, AWG Pike, W M√ºller.	ESR and U-series analyses of faunal material from Cuddie Springs, NSW, Australia: implications for the timing of the extinction of the Australian megafauna	Quaternary Science Reviews	29:596-610	m*	A*	Cuddie Springs
11905	-30.3486	147.343	Diprotodontidae	Diprotodon	species indet.	2044	Tooth	Enamel					266.5	=	57	1S	266500	57000	EU-ESR			yes	in situ					Direct		NSW	2010	Gr√ºn R, S Eggins, M Aubert, N Spooner, AWG Pike, W M√ºller.	ESR and U-series analyses of faunal material from Cuddie Springs, NSW, Australia: implications for the timing of the extinction of the Australian megafauna	Quaternary Science Reviews	29:596-610	m*	A*	Cuddie Springs
11915	-30.3486	147.343	Diprotodontidae	Diprotodon	species indet.	2062	Tooth	Enamel					780	=	127	1S	780000	127000	EU-ESR			yes	in situ					Direct		NSW	2010	Gr√ºn R, S Eggins, M Aubert, N Spooner, AWG Pike, W M√ºller.	ESR and U-series analyses of faunal material from Cuddie Springs, NSW, Australia: implications for the timing of the extinction of the Australian megafauna	Quaternary Science Reviews	29:596-610	m*	A*	Cuddie Springs
11916	-30.3486	147.343	Macropodidae	Macropus	ferragus	2063	Tooth	Enamel					784	=	126.5	1S	784000	126500	EU-ESR			yes	in situ					Direct		NSW	2010	Gr√ºn R, S Eggins, M Aubert, N Spooner, AWG Pike, W M√ºller.	ESR and U-series analyses of faunal material from Cuddie Springs, NSW, Australia: implications for the timing of the extinction of the Australian megafauna	Quaternary Science Reviews	29:596-610	m*	A*	Cuddie Springs
11918	-30.3486	147.343	Diprotodontidae	Diprotodon	species indet.	2064	Tooth	Enamel					726.5	=	123	1S	726500	123000	EU-ESR			yes	in situ					Direct		NSW	2010	Gr√ºn R, S Eggins, M Aubert, N Spooner, AWG Pike, W M√ºller.	ESR and U-series analyses of faunal material from Cuddie Springs, NSW, Australia: implications for the timing of the extinction of the Australian megafauna	Quaternary Science Reviews	29:596-610	m*	A*	Cuddie Springs
11919	-30.3486	147.343	Macropodidae	Macropus	fuliginosus/giganteus/titan	2066	Tooth	Enamel					700	=	114	1S	700	114	EU-ESR			yes	in situ					Direct		NSW	2010	Gr√ºn R, S Eggins, M Aubert, N Spooner, AWG Pike, W M√ºller.	ESR and U-series analyses of faunal material from Cuddie Springs, NSW, Australia: implications for the timing of the extinction of the Australian megafauna	Quaternary Science Reviews	29:596-610	m*	A*	Cuddie Springs
	-33.2	145.5	Hominidae	Homo	sapiens	ANUA-35	Bone (post-cranial fragments)	Collagen (amino acids)					0.117	=	0.005		73	44	AMS radiocarbon BP											NSW	2002	Gillespie R	Dating the first Australians	Radiocarbon	44:455-472		A	Willandra Lakes-burial
	-7.32024	144.169	Hominidae	Homo	sapiens	Wk-18940	Sediment	Charcoal					0.084	=	0.034		95	69	AMS radiocarbon BP											Gulf Province	2008	David B	Rethinking cultural chronologies and past landscape engagement in the Kopi region, Gulf Province, Papua New Guinea	The Holocene	18:463-479		A	Ihi Kaeke
	-7.32024	144.169	Hominidae	Homo	sapiens	Wk-18941	Sediment	Charcoal					0.114	=	0.039		108	78	AMS radiocarbon BP											Gulf Province	2008	David B	Rethinking cultural chronologies and past landscape engagement in the Kopi region, Gulf Province, Papua New Guinea	The Holocene	18:463-479		A	Ihi Kaeke
	-9.9685	142.183	Hominidae	Homo	sapiens	Wk-21514	Sediment	Charcoal					0.131	=	0.032		110	80	Radiocarbon BP											QLD	2008	McNiven IJ, Wright D	Ritualised marine midden formation in western Zenadh Kes (Torres Strait)	In: Clark G, Leach F, O'Connor S (eds) Islands of inquiry: Colonisation, seafaring and the archaeology of maritime landscapes. Australian National University Press, Canberra, ACT, Australia	p 133-147		A	Goemu
	-7.32263	144.188	Hominidae	Homo	sapiens	Wk-18934	Sediment	Charcoal					0.139	=	0.034		115	82	AMS radiocarbon BP											Gulf Province	2008	David B	Rethinking cultural chronologies and past landscape engagement in the Kopi region, Gulf Province, Papua New Guinea	The Holocene	18:463-479		A	Puriau
	-7.30969	144.178	Hominidae	Homo	sapiens	Wk-18884	Sediment	Charcoal					0.135	=	0.041		118	83	AMS radiocarbon BP											Gulf Province	2008	David B	Rethinking cultural chronologies and past landscape engagement in the Kopi region, Gulf Province, Papua New Guinea	The Holocene	18:463-479		A	Kikiniu
	-7.30969	144.178	Hominidae	Homo	sapiens	Wk-18871	Sediment	Charcoal					0.146	=	0.036		121	84	AMS radiocarbon BP											Gulf Province	2008	David B	Rethinking cultural chronologies and past landscape engagement in the Kopi region, Gulf Province, Papua New Guinea	The Holocene	18:463-479		A	Kikiniu
	-7.25622	144.138	Hominidae	Homo	sapiens	Wk-18933	Sediment	Charcoal					0.155	=	0.034		126	85	AMS radiocarbon BP											Gulf Province	2008	David B	Rethinking cultural chronologies and past landscape engagement in the Kopi region, Gulf Province, Papua New Guinea	The Holocene	18:463-479		A	Epe Amoho Rockshelter
	-7.32263	144.188	Hominidae	Homo	sapiens	Wk-18929	Sediment	Charcoal					0.149	=	0.043		126	85	AMS radiocarbon BP											Gulf Province	2008	David B	Rethinking cultural chronologies and past landscape engagement in the Kopi region, Gulf Province, Papua New Guinea	The Holocene	18:463-479		A	Puriau
	-9.9685	142.183	Hominidae	Homo	sapiens	Wk-21515	Sediment	Charcoal					0.16	=	0.031		129	86	Radiocarbon BP											QLD	2008	McNiven IJ, Wright D	Ritualised marine midden formation in western Zenadh Kes (Torres Strait)	In: Clark G, Leach F, O'Connor S (eds) Islands of inquiry: Colonisation, seafaring and the archaeology of maritime landscapes. Australian National University Press, Canberra, ACT, Australia	p 133-147		A	Goemu
	-7.30969	144.178	Hominidae	Homo	sapiens	Wk-18896	Sediment	Charcoal					0.161	=	0.037		132	86	AMS radiocarbon BP											Gulf Province	2008	David B	Rethinking cultural chronologies and past landscape engagement in the Kopi region, Gulf Province, Papua New Guinea	The Holocene	18:463-479		A	Kikiniu
	-7.32263	144.188	Hominidae	Homo	sapiens	Wk-18928	Sediment	Charcoal					0.163	=	0.034		132	86	AMS radiocarbon BP											Gulf Province	2008	David B	Rethinking cultural chronologies and past landscape engagement in the Kopi region, Gulf Province, Papua New Guinea	The Holocene	18:463-479		A	Puriau
	-7.31888	144.18	Hominidae	Homo	sapiens	Wk-18938	Sediment	Charcoal					0.164	=	0.035		134	86	AMS radiocarbon BP											Gulf Province	2008	David B	Rethinking cultural chronologies and past landscape engagement in the Kopi region, Gulf Province, Papua New Guinea	The Holocene	18:463-479		A	Porokoiu
	-7.30969	144.178	Hominidae	Homo	sapiens	Wk-18897	Sediment	Charcoal					0.168	=	0.035		137	86	AMS radiocarbon BP											Gulf Province	2008	David B	Rethinking cultural chronologies and past landscape engagement in the Kopi region, Gulf Province, Papua New Guinea	The Holocene	18:463-479		A	Kikiniu
	-7.36726	144.173	Hominidae	Homo	sapiens	Wk-18912	Sediment	Charcoal					0.177	=	0.037		146	86	AMS radiocarbon BP											Gulf Province	2008	David B	Rethinking cultural chronologies and past landscape engagement in the Kopi region, Gulf Province, Papua New Guinea	The Holocene	18:463-479		A	KG125 Hunting camp
	-7.32263	144.188	Hominidae	Homo	sapiens	Wk-18935	Sediment	Charcoal					0.186	=	0.034		157	84	AMS radiocarbon BP											Gulf Province	2008	David B	Rethinking cultural chronologies and past landscape engagement in the Kopi region, Gulf Province, Papua New Guinea	The Holocene	18:463-479		A	Puriau
	-17.75	145.51	Hominidae	Homo	sapiens	Wk-13574	Sediment	Charcoal					0.19	=	0.037		160	83	Radiocarbon BP											QLD	2007	Cosgrove R, Field J, Ferrier A	The archaeology of Australia's tropical rainforests	Palaeogeography, Palaeoclimatology, Palaeoecology	251:150-173		A	Urumbal Pocket
	-7.35156	144.183	Hominidae	Homo	sapiens	Wk-18887	Sediment	Charcoal					0.192	=	0.037		162	83	AMS radiocarbon BP											Gulf Province	2008	David B	Rethinking cultural chronologies and past landscape engagement in the Kopi region, Gulf Province, Papua New Guinea	The Holocene	18:463-479		A	KG124 Hunting camp
	-7.36726	144.173	Hominidae	Homo	sapiens	Wk-18893	Sediment	Charcoal					0.195	=	0.043		162	84	AMS radiocarbon BP											Gulf Province	2008	David B	Rethinking cultural chronologies and past landscape engagement in the Kopi region, Gulf Province, Papua New Guinea	The Holocene	18:463-479		A	KG125 Hunting camp
	-7.30969	144.178	Hominidae	Homo	sapiens	Wk-18872	Sediment	Charcoal					0.19	=	0.03		165	82	AMS radiocarbon BP											Gulf Province	2008	David B	Rethinking cultural chronologies and past landscape engagement in the Kopi region, Gulf Province, Papua New Guinea	The Holocene	18:463-479		A	Kikiniu
	-7.30969	144.178	Hominidae	Homo	sapiens	Wk-18883	Sediment	Charcoal					0.194	=	0.031		169	80	AMS radiocarbon BP											Gulf Province	2008	David B	Rethinking cultural chronologies and past landscape engagement in the Kopi region, Gulf Province, Papua New Guinea	The Holocene	18:463-479		A	Kikiniu
	-17.4439	145.785	Hominidae	Homo	sapiens	Beta-2471	Wood	Charcoal					0.2	=	0.08		176	106	Radiocarbon BP											QLD	1982	Campbell JB	New radiocarbon results for North Queensland Prehistory	Australian Archaeology	14:62-66		A	Jiyer Cave
	-38.06	140.66	Hominidae	Homo	sapiens	Beta-25006	Sediment	Charcoal					0.21	=	0.07		178	102	Radiocarbon BP											SA	2011	Frankel D, Stern N	Karremarter - Mid to Late Holocene stone artefact production and use in the Lower Southeast of South Australia	Technical Reports of the Australian Museum	23:59-71		A	Piccaninnie Cave
	-7.35156	144.183	Hominidae	Homo	sapiens	Wk-18886	Sediment	Charcoal					0.208	=	0.035		181	75	AMS radiocarbon BP											Gulf Province	2008	David B	Rethinking cultural chronologies and past landscape engagement in the Kopi region, Gulf Province, Papua New Guinea	The Holocene	18:463-479		A	KG124 Hunting camp
	-7.30969	144.178	Hominidae	Homo	sapiens	Wk-18902	Sediment	Charcoal					0.209	=	0.036		181	75	AMS radiocarbon BP											Gulf Province	2008	David B	Rethinking cultural chronologies and past landscape engagement in the Kopi region, Gulf Province, Papua New Guinea	The Holocene	18:463-479		A	Kikiniu
	-7.30969	144.178	Hominidae	Homo	sapiens	Wk-18869	Sediment	Charcoal					0.206	=	0.032		182	73	AMS radiocarbon BP											Gulf Province	2008	David B	Rethinking cultural chronologies and past landscape engagement in the Kopi region, Gulf Province, Papua New Guinea	The Holocene	18:463-479		A	Kikiniu
	-7.32263	144.188	Hominidae	Homo	sapiens	Wk-18937	Sediment	Charcoal					0.211	=	0.032		188	69	AMS radiocarbon BP											Gulf Province	2008	David B	Rethinking cultural chronologies and past landscape engagement in the Kopi region, Gulf Province, Papua New Guinea	The Holocene	18:463-479		A	Puriau
	-7.25622	144.138	Hominidae	Homo	sapiens	Wk-18930	Sediment	Charcoal					0.217	=	0.033		193	67	AMS radiocarbon BP											Gulf Province	2008	David B	Rethinking cultural chronologies and past landscape engagement in the Kopi region, Gulf Province, Papua New Guinea	The Holocene	18:463-479		A	Epe Amoho Rockshelter
	-7.25622	144.138	Hominidae	Homo	sapiens	Wk-18925	Sediment	Charcoal					0.223	=	0.038		194	72	AMS radiocarbon BP											Gulf Province	2008	David B	Rethinking cultural chronologies and past landscape engagement in the Kopi region, Gulf Province, Papua New Guinea	The Holocene	18:463-479		A	Epe Amoho Rockshelter
	-7.31888	144.18	Hominidae	Homo	sapiens	Wk-18939	Sediment	Charcoal					0.223	=	0.035		196	67	AMS radiocarbon BP											Gulf Province	2008	David B	Rethinking cultural chronologies and past landscape engagement in the Kopi region, Gulf Province, Papua New Guinea	The Holocene	18:463-479		A	Porokoiu
	-7.33591	144.174	Hominidae	Homo	sapiens	Wk-18911	Sediment	Charcoal					0.225	=	0.033		200	63	AMS radiocarbon BP											Gulf Province	2008	David B	Rethinking cultural chronologies and past landscape engagement in the Kopi region, Gulf Province, Papua New Guinea	The Holocene	18:463-479		A	KG141 Ossuary
	-7.32263	144.188	Hominidae	Homo	sapiens	Wk-18936	Sediment	Charcoal					0.235	=	0.034		208	62	AMS radiocarbon BP											Gulf Province	2008	David B	Rethinking cultural chronologies and past landscape engagement in the Kopi region, Gulf Province, Papua New Guinea	The Holocene	18:463-479		A	Puriau
	-7.33591	144.174	Hominidae	Homo	sapiens	Wk-18920	Sediment	Charcoal					0.238	=	0.033		211	61	AMS radiocarbon BP											Gulf Province	2008	David B	Rethinking cultural chronologies and past landscape engagement in the Kopi region, Gulf Province, Papua New Guinea	The Holocene	18:463-479		A	KG143 Cave
	-13.1	133.8	Hominidae	Homo	sapiens	Wk-28123	Sediment	Charcoal					0.25	=	0.03		224	60	AMS radiocarbon BP											NT	2011	David B, Geneste J-M, Whear RL, Delannoy J-J, Katherine M, Gunn R, Clarkson C, Plisson H, Lee P, Petchey F, Rowe C, Barker B, Lamb L, Miller W, Hoerle S, James D, Boche E, Aplin K, McNiven IJ, Richards T, Fairbairn A, Matthews J	Nawarla Gabarnmang, a 45,180 +/- 910 cal BP site in Jawoyn country, Southwest Arnhem land Plateau	Australian Archaeology	73:73-77		A	Nawarla Gabarnmang
	-7.30969	144.178	Hominidae	Homo	sapiens	Wk-18881	Sediment	Charcoal					0.264	=	0.033		246	71	AMS radiocarbon BP											Gulf Province	2008	David B	Rethinking cultural chronologies and past landscape engagement in the Kopi region, Gulf Province, Papua New Guinea	The Holocene	18:463-479		A	Kikiniu
	-32.3	141.5	Hominidae	Homo	sapiens	Wk-9994	Fireplace	Charcoal					0.261	=	0.049		246	95	Radiocarbon BP											NSW	2006	Shiner JI	Artefact discard and accumulated patterns in stone artefact assemblage composition in surface archaeological deposits from Pine Point and Langwell Stations, western New South Wales	The Rangeland Journal	28:183-195		A	Pine Creek
	-7.33591	144.174	Hominidae	Homo	sapiens	Wk-18891	Sediment	Charcoal					0.263	=	0.0938		248	129	AMS radiocarbon BP											Gulf Province	2008	David B	Rethinking cultural chronologies and past landscape engagement in the Kopi region, Gulf Province, Papua New Guinea	The Holocene	18:463-479		A	KG143 Cave
	-7.33501	144.175	Hominidae	Homo	sapiens	Wk-20962	Tooth	na					0.287	=	0.037		306	83	AMS radiocarbon BP											Gulf Province	2008	David B	Rethinking cultural chronologies and past landscape engagement in the Kopi region, Gulf Province, Papua New Guinea	The Holocene	18:463-479		A	OJP Ossuary
	-14.52	132.9	Hominidae	Homo	sapiens	Wk-19888	Sediment	Charcoal (over bedrock)					0.293	=	0.035		322	78	Radiocarbon BP											NT	2007	Gunn RG, Whear RL	Tangtangjal Cave revisited	The Artefact	30: 16-28		A	Tangtangjal Cave
	-7.30969	144.178	Hominidae	Homo	sapiens	Wk-18900	Sediment	Charcoal					0.302	=	0.037		341	74	AMS radiocarbon BP											Gulf Province	2008	David B	Rethinking cultural chronologies and past landscape engagement in the Kopi region, Gulf Province, Papua New Guinea	The Holocene	18:463-479		A	Kikiniu
	-7.30969	144.178	Hominidae	Homo	sapiens	Wk-18880	Sediment	Charcoal					0.306	=	0.031		352	63	AMS radiocarbon BP											Gulf Province	2008	David B	Rethinking cultural chronologies and past landscape engagement in the Kopi region, Gulf Province, Papua New Guinea	The Holocene	18:463-479		A	Kikiniu
	-7.25622	144.138	Hominidae	Homo	sapiens	Wk-18931	Sediment	Charcoal					0.327	=	0.034		375	52	AMS radiocarbon BP											Gulf Province	2008	David B	Rethinking cultural chronologies and past landscape engagement in the Kopi region, Gulf Province, Papua New Guinea	The Holocene	18:463-479		A	Epe Amoho Rockshelter
	-7.33318	144.182	Hominidae	Homo	sapiens	Wk-19978	Sediment	Charcoal					0.333	=	0.041		377	56	AMS radiocarbon BP											Gulf Province	2008	David B	Rethinking cultural chronologies and past landscape engagement in the Kopi region, Gulf Province, Papua New Guinea	The Holocene	18:463-479		A	KG140 Cave
	-7.33591	144.174	Hominidae	Homo	sapiens	Wk-18921	Sediment	Charcoal					0.354	=	0.034		389	47	AMS radiocarbon BP											Gulf Province	2008	David B	Rethinking cultural chronologies and past landscape engagement in the Kopi region, Gulf Province, Papua New Guinea	The Holocene	18:463-479		A	KG143 Cave
	-7.30969	144.178	Hominidae	Homo	sapiens	Wk-18876	Sediment	Charcoal					0.401	=	0.035		411	55	AMS radiocarbon BP											Gulf Province	2008	David B	Rethinking cultural chronologies and past landscape engagement in the Kopi region, Gulf Province, Papua New Guinea	The Holocene	18:463-479		A	Kikiniu
	-17.75	145.51	Hominidae	Homo	sapiens	Wk-13566	Sediment	Charcoal					0.422	=	0.04		424	59	Radiocarbon BP											QLD	2007	Cosgrove R, Field J, Ferrier A	The archaeology of Australia's tropical rainforests	Palaeogeography, Palaeoclimatology, Palaeoecology	251:150-173		A	Urumbal Pocket
	-7.33501	144.175	Hominidae	Homo	sapiens	Wk-20963	Tooth	na					0.434	=	0.037		437	59	AMS radiocarbon BP											Gulf Province	2008	David B	Rethinking cultural chronologies and past landscape engagement in the Kopi region, Gulf Province, Papua New Guinea	The Holocene	18:463-479		A	OJP Ossuary
	-32.3	141.5	Hominidae	Homo	sapiens	Wk-12322	Fireplace	Charcoal					0.458	=	0.058		446	64	Radiocarbon BP											NSW	2006	Shiner JI	Artefact discard and accumulated patterns in stone artefact assemblage composition in surface archaeological deposits from Pine Point and Langwell Stations, western New South Wales	The Rangeland Journal	28:183-195		A	Pine Creek
	-7.33591	144.174	Hominidae	Homo	sapiens	Wk-19982	Sediment	Charcoal					0.468	=	0.042		469	54	AMS radiocarbon BP											Gulf Province	2008	David B	Rethinking cultural chronologies and past landscape engagement in the Kopi region, Gulf Province, Papua New Guinea	The Holocene	18:463-479		A	KG141 Ossuary
	-32.3	141.5	Hominidae	Homo	sapiens	Wk-12323	Fireplace	Charcoal					0.481	=	0.055		471	61	Radiocarbon BP											NSW	2006	Shiner JI	Artefact discard and accumulated patterns in stone artefact assemblage composition in surface archaeological deposits from Pine Point and Langwell Stations, western New South Wales	The Rangeland Journal	28:183-195		A	Pine Creek
	-32.98	150.9	Hominidae	Homo	sapiens	ANU-6058	Sediment	Charcoal					0.54	=	0.18		486	166	Radiocarbon BP											NSW	2008	McDonald J, Veth P	Rock-art of the Western Desert and Pilbara: Pigment dates provide new perspectives on the role of art in the Australian Arid Zone	Australian Aboriginal Studies	1:4-21		A	Yengo
	-17.75	145.51	Hominidae	Homo	sapiens	Wk-11341	Sediment	Charcoal					0.514	=	0.051		508	44	Radiocarbon BP											QLD	2007	Cosgrove R, Field J, Ferrier A	The archaeology of Australia's tropical rainforests	Palaeogeography, Palaeoclimatology, Palaeoecology	251:150-173		A	Urumbal Pocket
	-32.3	141.5	Hominidae	Homo	sapiens	Wk-12324	Fireplace	Charcoal					0.516	=	0.052		510	44	Radiocarbon BP											NSW	2006	Shiner JI	Artefact discard and accumulated patterns in stone artefact assemblage composition in surface archaeological deposits from Pine Point and Langwell Stations, western New South Wales	The Rangeland Journal	28:183-195		A	Pine Creek
	-9.9685	142.183	Hominidae	Homo	sapiens	Wk-21516	Sediment	Charcoal					0.524	=	0.032		519	14	Radiocarbon BP											QLD	2008	McNiven IJ, Wright D	Ritualised marine midden formation in western Zenadh Kes (Torres Strait)	In: Clark G, Leach F, O'Connor S (eds) Islands of inquiry: Colonisation, seafaring and the archaeology of maritime landscapes. Australian National University Press, Canberra, ACT, Australia	p 133-147		A	Goemu
	-17.42	124.97	Hominidae	Homo	sapiens	Wk-3075	Sediment	Charcoal					0.65	=	0.09		598	57	Radiocarbon BP											NT	1995	O'Connor S	Carpenter's Gap Rockshelter 1: 40,000 years of aboriginal occupation in the Napier Ranges, Kimberley, WA	Australian Archaeology	40:58-59		A	Carpenter's Gap Shelter
	-7.44214	144.368	Hominidae	Homo	sapiens	Wk-23549	Sediment	Charcoal					0.662	=	0.03		603	29	AMS radiocarbon BP											Gulf Province	2010	David B, Geneste J-M, Aplin K, Delannoy J-J, Araho N, Clarkson C, Connell K, Haberle S, Barker B, Lamb L, Stanisic J, Fairbairn A, Skelly R, Rowe C	The EMO Site (OAC), Gulf Province, Papua New Guinea: Resolving long-standing questions of antiquity and implications for the history of the ancestral 'Hiri' Maritime Trade	Australian Archaeology	70:39-54		A	Emo
	-9.957	142.163	Hominidae	Homo	sapiens	Wk-10703	Mound	Bone (Dugong rib)					0.67	=	0.044		604	33	Radiocarbon BP											QLD	2003	McNiven IJ, Feldman R	Ritually orchestrated seascapes hunting magic and dugong bone mounds in Torres Strait, NE Australia	Cambridge Archaeological Journal	13:169-194		A	Pulu Mound
	-7.44214	144.368	Hominidae	Homo	sapiens	Wk-23548	Sediment	Charcoal					0.671	=	0.03		605	29	AMS radiocarbon BP											Gulf Province	2010	David B, Geneste J-M, Aplin K, Delannoy J-J, Araho N, Clarkson C, Connell K, Haberle S, Barker B, Lamb L, Stanisic J, Fairbairn A, Skelly R, Rowe C	The EMO Site (OAC), Gulf Province, Papua New Guinea: Resolving long-standing questions of antiquity and implications for the history of the ancestral 'Hiri' Maritime Trade	Australian Archaeology	70:39-54		A	Emo
	-17.75	145.51	Hominidae	Homo	sapiens	Wk-13575	Sediment	Charcoal					0.672	=	0.039		605	31	Radiocarbon BP											QLD	2007	Cosgrove R, Field J, Ferrier A	The archaeology of Australia's tropical rainforests	Palaeogeography, Palaeoclimatology, Palaeoecology	251:150-173		A	Urumbal Pocket
	-23.2775	150.989	Hominidae	Homo	sapiens	Wk-10099	Sediment	Charcoal					0.659	=	0.129		606	97	Radiocarbon BP											QLD	na	Eales	personal comments	na	na		A	Big Foot Art Site
	-7.44214	144.368	Hominidae	Homo	sapiens	Wk-23502	Sediment	Charcoal					0.706	=	0.033		613	34	AMS radiocarbon BP											Gulf Province	2010	David B, Geneste J-M, Aplin K, Delannoy J-J, Araho N, Clarkson C, Connell K, Haberle S, Barker B, Lamb L, Stanisic J, Fairbairn A, Skelly R, Rowe C	The EMO Site (OAC), Gulf Province, Papua New Guinea: Resolving long-standing questions of antiquity and implications for the history of the ancestral 'Hiri' Maritime Trade	Australian Archaeology	70:39-54		A	Emo
	-7.33501	144.175	Hominidae	Homo	sapiens	Wk-19984	Sediment	Charcoal					0.708	=	0.043		615	36	AMS radiocarbon BP											Gulf Province	2008	David B	Rethinking cultural chronologies and past landscape engagement in the Kopi region, Gulf Province, Papua New Guinea	The Holocene	18:463-479		A	OJP Ossuary
	-14.52	132.9	Hominidae	Homo	sapiens	Wk-19889	Sediment	Charcoal (above bedrock)					0.726	=	0.036		623	38	Radiocarbon BP											NT	2007	Gunn RG, Whear RL	Tangtangjal Cave revisited	The Artefact	30: 16-28		A	Tangtangjal Cave
	-32.3	141.5	Hominidae	Homo	sapiens	Wk-12325	Fireplace	Charcoal					0.771	=	0.046		665	45	Radiocarbon BP											NSW	2006	Shiner JI	Artefact discard and accumulated patterns in stone artefact assemblage composition in surface archaeological deposits from Pine Point and Langwell Stations, western New South Wales	The Rangeland Journal	28:183-195		A	Pine Creek
	-6.61	145.933	Hominidae	Homo	sapiens	GaK-622	Sediment	Wood charcoal					0.77	=	0.1		678	83	Radiocarbon BP											Eastern Highlands Province	2009	Sutton A, Mountain M-J, Aplin K, Bulmer S, Denham T	Archaeozoological records for the highlands of New Guinea: A Review of current evidence	Australian Archaeology	69:41-58		A	Aibura Rockshelter
	-9.9685	142.183	Hominidae	Homo	sapiens	Wk-21520	Sediment	Charcoal					0.878	=	0.032		741	34	Radiocarbon BP											QLD	2008	McNiven IJ, Wright D	Ritualised marine midden formation in western Zenadh Kes (Torres Strait)	In: Clark G, Leach F, O'Connor S (eds) Islands of inquiry: Colonisation, seafaring and the archaeology of maritime landscapes. Australian National University Press, Canberra, ACT, Australia	p 133-147		A	Goemu
	-32.3	141.5	Hominidae	Homo	sapiens	Wk-10282	Fireplace	Charcoal					0.886	=	0.047		760	54	Radiocarbon BP											NSW	2006	Shiner JI	Artefact discard and accumulated patterns in stone artefact assemblage composition in surface archaeological deposits from Pine Point and Langwell Stations, western New South Wales	The Rangeland Journal	28:183-195		A	Pine Creek
	-32.3	141.5	Hominidae	Homo	sapiens	Wk-10280	Fireplace	Charcoal					0.91	=	0.052		789	61	Radiocarbon BP											NSW	2006	Shiner JI	Artefact discard and accumulated patterns in stone artefact assemblage composition in surface archaeological deposits from Pine Point and Langwell Stations, western New South Wales	The Rangeland Journal	28:183-195		A	Pine Creek
	-16.3817	144.134	Hominidae	Homo	sapiens	Beta-46317	Sediment	Charcoal					0.94	=	0.06		817	63	Radiocarbon BP (C13 adjusted)											QLD	1992	David B	Recent research in southeast Cape York Peninsula: Nurrabullgin and Mordor Cave	Queensland Archaeological Research	9:50-53		A	Mordor Cave
	-9.9685	142.183	Hominidae	Homo	sapiens	Wk-21521	Sediment	Charcoal					0.954	=	0.032		832	49	Radiocarbon BP											QLD	2008	McNiven IJ, Wright D	Ritualised marine midden formation in western Zenadh Kes (Torres Strait)	In: Clark G, Leach F, O'Connor S (eds) Islands of inquiry: Colonisation, seafaring and the archaeology of maritime landscapes. Australian National University Press, Canberra, ACT, Australia	p 133-147		A	Goemu
	-5.91043	150.118	Hominidae	Homo	sapiens	Beta-55458	Sediment	Charcoal					0.92	=	0.19		835	168	Radiocarbon BP											West New Britain Province	1994	Pavlides C, Gosden C	35,000-year-old sites in the rainforests of West New Britain, Papua New Guinea	Antiquity	68:604-610		A	Yombon
	-32.3	141.5	Hominidae	Homo	sapiens	Wk-12320	Fireplace	Charcoal					0.967	=	0.062		836	60	Radiocarbon BP											NSW	2006	Shiner JI	Artefact discard and accumulated patterns in stone artefact assemblage composition in surface archaeological deposits from Pine Point and Langwell Stations, western New South Wales	The Rangeland Journal	28:183-195		A	Pine Creek
	-24.21	133.39	Hominidae	Homo	sapiens	Beta-16306	Fireplace	Charcoal (hearth)					0.98	=	0.08		845	74	Radiocarbon BP											NT	1986	Smith MA	A revised chronology for Intirtekwerle (James Range East) Rockshelter, Central Australia	. The Beagle: Records of the Museums and Art Galleries of the Northern Territory	3: 123-130		A	Urre
	-32.3	141.5	Hominidae	Homo	sapiens	Wk-12319	Fireplace	Charcoal					1.002	=	0.048		858	49	Radiocarbon BP											NSW	2006	Shiner JI	Artefact discard and accumulated patterns in stone artefact assemblage composition in surface archaeological deposits from Pine Point and Langwell Stations, western New South Wales	The Rangeland Journal	28:183-195		A	Pine Creek
	-7.25622	144.138	Hominidae	Homo	sapiens	Wk-18922	Sediment	Charcoal					1.042	=	0.035		888	49	AMS radiocarbon BP											Gulf Province	2008	David B	Rethinking cultural chronologies and past landscape engagement in the Kopi region, Gulf Province, Papua New Guinea	The Holocene	18:463-479		A	Epe Amoho Rockshelter
	-17.75	145.51	Hominidae	Homo	sapiens	Wk-11342	Sediment	Charcoal					1.045	=	0.051		891	60	Radiocarbon BP											QLD	2007	Cosgrove R, Field J, Ferrier A	The archaeology of Australia's tropical rainforests	Palaeogeography, Palaeoclimatology, Palaeoecology	251:150-173		A	Urumbal Pocket
	-7.25622	144.138	Hominidae	Homo	sapiens	Wk-19971	Sediment	Charcoal					1.065	=	0.044		917	58	AMS radiocarbon BP											Gulf Province	2008	David B	Rethinking cultural chronologies and past landscape engagement in the Kopi region, Gulf Province, Papua New Guinea	The Holocene	18:463-479		A	Epe Amoho Rockshelter
	-25.15	148.617	Hominidae	Homo	sapiens	ANU-12013	Sediment (associated with Macrozamia seeds)	Charcoal					1.09	=	0.06		951	73	Radiocarbon BP											QLD	2008	Asmussen B	Anything more than a picnic? Re-considering arguments for ceremonial Macrozamia use in mid-Holocene Australia	Archaeology in Oceania	43:93-103		A	Wanderer's Cave
	-7.25622	144.138	Hominidae	Homo	sapiens	Wk-19969	Sediment	Charcoal					1.103	=	0.031		968	38	AMS radiocarbon BP											Gulf Province	2008	David B	Rethinking cultural chronologies and past landscape engagement in the Kopi region, Gulf Province, Papua New Guinea	The Holocene	18:463-479		A	Epe Amoho Rockshelter
	-7.25622	144.138	Hominidae	Homo	sapiens	Wk-18923	Sediment	Charcoal					1.103	=	0.035		970	42	AMS radiocarbon BP											Gulf Province	2008	David B	Rethinking cultural chronologies and past landscape engagement in the Kopi region, Gulf Province, Papua New Guinea	The Holocene	18:463-479		A	Epe Amoho Rockshelter
	-7.25622	144.138	Hominidae	Homo	sapiens	Wk-19972	Sediment	Charcoal					1.119	=	0.044		988	48	AMS radiocarbon BP											Gulf Province	2008	David B	Rethinking cultural chronologies and past landscape engagement in the Kopi region, Gulf Province, Papua New Guinea	The Holocene	18:463-479		A	Epe Amoho Rockshelter
	-7.30969	144.178	Hominidae	Homo	sapiens	Wk-18903	Sediment	Charcoal					1.145	=	0.033		1005	37	AMS radiocarbon BP											Gulf Province	2008	David B	Rethinking cultural chronologies and past landscape engagement in the Kopi region, Gulf Province, Papua New Guinea	The Holocene	18:463-479		A	Kikiniu
	-7.32024	144.169	Hominidae	Homo	sapiens	Wk-18942	Sediment	Charcoal					1.145	=	0.038		1006	41	AMS radiocarbon BP											Gulf Province	2008	David B	Rethinking cultural chronologies and past landscape engagement in the Kopi region, Gulf Province, Papua New Guinea	The Holocene	18:463-479		A	Ihi Kaeke
	-7.32024	144.169	Hominidae	Homo	sapiens	Wk-18943	Sediment	Charcoal					1.151	=	0.033		1009	37	AMS radiocarbon BP											Gulf Province	2008	David B	Rethinking cultural chronologies and past landscape engagement in the Kopi region, Gulf Province, Papua New Guinea	The Holocene	18:463-479		A	Ihi Kaeke
	-7.30969	144.178	Hominidae	Homo	sapiens	Wk-18868	Sediment	Charcoal					1.162	=	0.032		1015	37	AMS radiocarbon BP											Gulf Province	2008	David B	Rethinking cultural chronologies and past landscape engagement in the Kopi region, Gulf Province, Papua New Guinea	The Holocene	18:463-479		A	Kikiniu
	-7.30969	144.178	Hominidae	Homo	sapiens	Wk-18908	Sediment	Charcoal					1.187	=	0.034		1037	51	AMS radiocarbon BP											Gulf Province	2008	David B	Rethinking cultural chronologies and past landscape engagement in the Kopi region, Gulf Province, Papua New Guinea	The Holocene	18:463-479		A	Kikiniu
	-7.30969	144.178	Hominidae	Homo	sapiens	Wk-20372	Sediment	Charcoal					1.21	=	0.035		1071	61	AMS radiocarbon BP											Gulf Province	2008	David B	Rethinking cultural chronologies and past landscape engagement in the Kopi region, Gulf Province, Papua New Guinea	The Holocene	18:463-479		A	Kikiniu
	-7.30969	144.178	Hominidae	Homo	sapiens	Wk-18870	Sediment	Charcoal					1.212	=	0.032		1074	59	AMS radiocarbon BP											Gulf Province	2008	David B	Rethinking cultural chronologies and past landscape engagement in the Kopi region, Gulf Province, Papua New Guinea	The Holocene	18:463-479		A	Kikiniu
	-33.37	151.18	Hominidae	Homo	sapiens	ANU-8134	Sediment	Charcoal					1.22	=	0.12		1092	120	Radiocarbon BP											NSW	2008	McDonald J	Dreamtime Superhighway: An Analysis of Sydney Rock Art and Prehistoric Information Exchange	Terra Australis	27		A	Upside-Down Man
	-7.33591	144.174	Hominidae	Homo	sapiens	Wk-18910	Sediment	Charcoal					1.239	=	0.038		1113	60	AMS radiocarbon BP											Gulf Province	2008	David B	Rethinking cultural chronologies and past landscape engagement in the Kopi region, Gulf Province, Papua New Guinea	The Holocene	18:463-479		A	KG141 Ossuary
	-17.75	145.51	Hominidae	Homo	sapiens	Wk-13576	Sediment	Charcoal					1.244	=	0.04		1119	61	Radiocarbon BP											QLD	2007	Cosgrove R, Field J, Ferrier A	The archaeology of Australia's tropical rainforests	Palaeogeography, Palaeoclimatology, Palaeoecology	251:150-173		A	Urumbal Pocket
	-32.3	141.5	Hominidae	Homo	sapiens	Wk-12321	Fireplace	Charcoal					1.247	=	0.056		1121	75	Radiocarbon BP											NSW	2006	Shiner JI	Artefact discard and accumulated patterns in stone artefact assemblage composition in surface archaeological deposits from Pine Point and Langwell Stations, western New South Wales	The Rangeland Journal	28:183-195		A	Pine Creek
	-7.30969	144.178	Hominidae	Homo	sapiens	Wk-18907	Sediment	Charcoal					1.259	=	0.034		1135	54	AMS radiocarbon BP											Gulf Province	2008	David B	Rethinking cultural chronologies and past landscape engagement in the Kopi region, Gulf Province, Papua New Guinea	The Holocene	18:463-479		A	Kikiniu
	-7.30969	144.178	Hominidae	Homo	sapiens	Wk-18873	Sediment	Charcoal					1.271	=	0.031		1146	54	AMS radiocarbon BP											Gulf Province	2008	David B	Rethinking cultural chronologies and past landscape engagement in the Kopi region, Gulf Province, Papua New Guinea	The Holocene	18:463-479		A	Kikiniu
	-7.32024	144.169	Hominidae	Homo	sapiens	Wk-19976	Sediment	Charcoal					1.286	=	0.044		1164	63	AMS radiocarbon BP											Gulf Province	2008	David B	Rethinking cultural chronologies and past landscape engagement in the Kopi region, Gulf Province, Papua New Guinea	The Holocene	18:463-479		A	Ihi Kaeke
	-7.33318	144.182	Hominidae	Homo	sapiens	Wk-18889	Sediment	Charcoal					1.298	=	0.035		1180	59	AMS radiocarbon BP											Gulf Province	2008	David B	Rethinking cultural chronologies and past landscape engagement in the Kopi region, Gulf Province, Papua New Guinea	The Holocene	18:463-479		A	KG140 Cave
	-7.33318	144.182	Hominidae	Homo	sapiens	Wk-18888	Sediment	Charcoal					1.303	=	0.039		1184	59	AMS radiocarbon BP											Gulf Province	2008	David B	Rethinking cultural chronologies and past landscape engagement in the Kopi region, Gulf Province, Papua New Guinea	The Holocene	18:463-479		A	KG140 Cave
	-7.33318	144.182	Hominidae	Homo	sapiens	Wk-19979	Sediment	Charcoal					1.307	=	0.044		1185	61	AMS radiocarbon BP											Gulf Province	2008	David B	Rethinking cultural chronologies and past landscape engagement in the Kopi region, Gulf Province, Papua New Guinea	The Holocene	18:463-479		A	KG140 Cave
	-7.30969	144.178	Hominidae	Homo	sapiens	Wk-20191	Sediment	Charcoal					1.307	=	0.043		1186	60	AMS radiocarbon BP											Gulf Province	2008	David B	Rethinking cultural chronologies and past landscape engagement in the Kopi region, Gulf Province, Papua New Guinea	The Holocene	18:463-479		A	Kikiniu
	-7.30969	144.178	Hominidae	Homo	sapiens	Wk-18879	Sediment	Charcoal					1.308	=	0.036		1192	57	AMS radiocarbon BP											Gulf Province	2008	David B	Rethinking cultural chronologies and past landscape engagement in the Kopi region, Gulf Province, Papua New Guinea	The Holocene	18:463-479		A	Kikiniu
	-7.33318	144.182	Hominidae	Homo	sapiens	Wk-18892	Sediment	Charcoal					1.309	=	0.035		1194	56	AMS radiocarbon BP											Gulf Province	2008	David B	Rethinking cultural chronologies and past landscape engagement in the Kopi region, Gulf Province, Papua New Guinea	The Holocene	18:463-479		A	KG140 Cave
	-7.30969	144.178	Hominidae	Homo	sapiens	Wk-18878	Sediment	Charcoal					1.319	=	0.031		1208	49	AMS radiocarbon BP											Gulf Province	2008	David B	Rethinking cultural chronologies and past landscape engagement in the Kopi region, Gulf Province, Papua New Guinea	The Holocene	18:463-479		A	Kikiniu
	-7.30969	144.178	Hominidae	Homo	sapiens	Wk-18901	Sediment	Charcoal					1.349	=	0.036		1227	42	AMS radiocarbon BP											Gulf Province	2008	David B	Rethinking cultural chronologies and past landscape engagement in the Kopi region, Gulf Province, Papua New Guinea	The Holocene	18:463-479		A	Kikiniu
	-7.30969	144.178	Hominidae	Homo	sapiens	Wk-18882	Sediment	Charcoal					1.351	=	0.031		1230	37	AMS radiocarbon BP											Gulf Province	2008	David B	Rethinking cultural chronologies and past landscape engagement in the Kopi region, Gulf Province, Papua New Guinea	The Holocene	18:463-479		A	Kikiniu
	-7.30969	144.178	Hominidae	Homo	sapiens	Wk-18904	Sediment	Charcoal					1.368	=	0.041		1237	44	AMS radiocarbon BP											Gulf Province	2008	David B	Rethinking cultural chronologies and past landscape engagement in the Kopi region, Gulf Province, Papua New Guinea	The Holocene	18:463-479		A	Kikiniu
	-7.30969	144.178	Hominidae	Homo	sapiens	Wk-18895	Sediment	Charcoal					1.373	=	0.037		1243	41	AMS radiocarbon BP											Gulf Province	2008	David B	Rethinking cultural chronologies and past landscape engagement in the Kopi region, Gulf Province, Papua New Guinea	The Holocene	18:463-479		A	Kikiniu
	-17.75	145.51	Hominidae	Homo	sapiens	Wk-13572	Sediment	Charcoal					1.374	=	0.039		1243	43	Radiocarbon BP											QLD	2007	Cosgrove R, Field J, Ferrier A	The archaeology of Australia's tropical rainforests	Palaeogeography, Palaeoclimatology, Palaeoecology	251:150-173		A	Urumbal Pocket
	-7.30969	144.178	Hominidae	Homo	sapiens	Wk-18885	Sediment	Charcoal					1.382	=	0.036		1250	41	AMS radiocarbon BP											Gulf Province	2008	David B	Rethinking cultural chronologies and past landscape engagement in the Kopi region, Gulf Province, Papua New Guinea	The Holocene	18:463-479		A	Kikiniu
	-7.30969	144.178	Hominidae	Homo	sapiens	Wk-18877	Sediment	Charcoal					1.457	=	0.032		1320	24	AMS radiocarbon BP											Gulf Province	2008	David B	Rethinking cultural chronologies and past landscape engagement in the Kopi region, Gulf Province, Papua New Guinea	The Holocene	18:463-479		A	Kikiniu
	-5.91043	150.118	Hominidae	Homo	sapiens	Beta-62321	Sediment	Charcoal					1.46	=	0.12		1327	129	Radiocarbon BP											West New Britain Province	1994	Pavlides C, Gosden C	35,000-year-old sites in the rainforests of West New Britain, Papua New Guinea	Antiquity	68:604-610		A	Yombon
	-9.95	142.167	Hominidae	Homo	sapiens	NZA-26585	Sediment	Charcoal					1.476	=	0.031		1331	23	AMS radiocarbon BP											QLD	2008	McNiven IJ, Crouch J, Weisler M, Kemp N, Martinez LC, Stanisic J, Orr M, Brady L, Hocknull S, Boles W	Tigershark Rockshelter (Baidamau Mudh): Seascape and settlement reconfigurations on the Sacred Islet of Pulu, Western Zenadh Kes (Torres Strait)	Australian Archaeology	66:15-32		A	Tigershark Rockshelter
	-17.75	145.51	Hominidae	Homo	sapiens	Wk-13568	Sediment	Charcoal					1.497	=	0.034		1344	28	Radiocarbon BP											QLD	2007	Cosgrove R, Field J, Ferrier A	The archaeology of Australia's tropical rainforests	Palaeogeography, Palaeoclimatology, Palaeoecology	251:150-173		A	Urumbal Pocket
	-33.37	151.18	Hominidae	Homo	sapiens	ANU-8133	Sediment	Charcoal					1.54	=	0.06		1398	62	Radiocarbon BP											NSW	2008	McDonald J	Dreamtime Superhighway: An Analysis of Sydney Rock Art and Prehistoric Information Exchange	Terra Australis	27		A	Upside-Down Man
	-7.30969	144.178	Hominidae	Homo	sapiens	Wk-18899	Sediment	Charcoal					1.554	=	0.037		1399	48	AMS radiocarbon BP											Gulf Province	2008	David B	Rethinking cultural chronologies and past landscape engagement in the Kopi region, Gulf Province, Papua New Guinea	The Holocene	18:463-479		A	Kikiniu
	-7.30969	144.178	Hominidae	Homo	sapiens	Wk-18905	Sediment	Charcoal					1.554	=	0.037		1399	48	AMS radiocarbon BP											Gulf Province	2008	David B	Rethinking cultural chronologies and past landscape engagement in the Kopi region, Gulf Province, Papua New Guinea	The Holocene	18:463-479		A	Kikiniu
	-13.1	133.8	Hominidae	Homo	sapiens	Wk-28615	Sediment	Charcoal					1.56	=	0.03		1402	43	AMS radiocarbon BP											NT	2011	David B, Geneste J-M, Whear RL, Delannoy J-J, Katherine M, Gunn R, Clarkson C, Plisson H, Lee P, Petchey F, Rowe C, Barker B, Lamb L, Miller W, Hoerle S, James D, Boche E, Aplin K, McNiven IJ, Richards T, Fairbairn A, Matthews J	Nawarla Gabarnmang, a 45,180 +/- 910 cal BP site in Jawoyn country, Southwest Arnhem land Plateau	Australian Archaeology	73:73-77		A	Nawarla Gabarnmang
	-32.98	150.9	Hominidae	Homo	sapiens	ANU-6216	Sediment	Charcoal					1.53	=	0.11		1405	112	Radiocarbon BP											NSW	2008	McDonald J, Veth P	Rock-art of the Western Desert and Pilbara: Pigment dates provide new perspectives on the role of art in the Australian Arid Zone	Australian Aboriginal Studies	1:4-21		A	Yengo
	-7.44214	144.368	Hominidae	Homo	sapiens	Wk-23553	Sediment	Charcoal					1.564	=	0.033		1409	46	AMS radiocarbon BP											Gulf Province	2010	David B, Geneste J-M, Aplin K, Delannoy J-J, Araho N, Clarkson C, Connell K, Haberle S, Barker B, Lamb L, Stanisic J, Fairbairn A, Skelly R, Rowe C	The EMO Site (OAC), Gulf Province, Papua New Guinea: Resolving long-standing questions of antiquity and implications for the history of the ancestral 'Hiri' Maritime Trade	Australian Archaeology	70:39-54		A	Emo
	-7.44214	144.368	Hominidae	Homo	sapiens	Wk-23550	Sediment	Charcoal					1.574	=	0.033		1422	47	AMS radiocarbon BP											Gulf Province	2010	David B, Geneste J-M, Aplin K, Delannoy J-J, Araho N, Clarkson C, Connell K, Haberle S, Barker B, Lamb L, Stanisic J, Fairbairn A, Skelly R, Rowe C	The EMO Site (OAC), Gulf Province, Papua New Guinea: Resolving long-standing questions of antiquity and implications for the history of the ancestral 'Hiri' Maritime Trade	Australian Archaeology	70:39-54		A	Emo
	-7.30969	144.178	Hominidae	Homo	sapiens	Wk-18909	Sediment	Charcoal					1.582	=	0.035		1432	48	AMS radiocarbon BP											Gulf Province	2008	David B	Rethinking cultural chronologies and past landscape engagement in the Kopi region, Gulf Province, Papua New Guinea	The Holocene	18:463-479		A	Kikiniu
	-17.75	145.51	Hominidae	Homo	sapiens	Wk-13570	Sediment	Charcoal					1.581	=	0.041		1432	52	Radiocarbon BP											QLD	2007	Cosgrove R, Field J, Ferrier A	The archaeology of Australia's tropical rainforests	Palaeogeography, Palaeoclimatology, Palaeoecology	251:150-173		A	Urumbal Pocket
	-16.3817	144.134	Hominidae	Homo	sapiens	Beta-46090	Sediment	Charcoal					1.58	=	0.07		1437	72	Radiocarbon BP (C13 adjusted)											QLD	1992	David B	Recent research in southeast Cape York Peninsula: Nurrabullgin and Mordor Cave	Queensland Archaeological Research	9:50-53		A	Mordor Cave
	-7.30969	144.178	Hominidae	Homo	sapiens	Wk-18906	Sediment	Charcoal					1.597	=	0.038		1447	48	AMS radiocarbon BP											Gulf Province	2008	David B	Rethinking cultural chronologies and past landscape engagement in the Kopi region, Gulf Province, Papua New Guinea	The Holocene	18:463-479		A	Kikiniu
	-7.44214	144.368	Hominidae	Homo	sapiens	Wk-23554	Sediment	Charcoal					1.644	=	0.043		1487	53	AMS radiocarbon BP											Gulf Province	2010	David B, Geneste J-M, Aplin K, Delannoy J-J, Araho N, Clarkson C, Connell K, Haberle S, Barker B, Lamb L, Stanisic J, Fairbairn A, Skelly R, Rowe C	The EMO Site (OAC), Gulf Province, Papua New Guinea: Resolving long-standing questions of antiquity and implications for the history of the ancestral 'Hiri' Maritime Trade	Australian Archaeology	70:39-54		A	Emo
	-7.44214	144.368	Hominidae	Homo	sapiens	Wk-23555	Sediment	Charcoal					1.646	=	0.043		1489	53	AMS radiocarbon BP											Gulf Province	2010	David B, Geneste J-M, Aplin K, Delannoy J-J, Araho N, Clarkson C, Connell K, Haberle S, Barker B, Lamb L, Stanisic J, Fairbairn A, Skelly R, Rowe C	The EMO Site (OAC), Gulf Province, Papua New Guinea: Resolving long-standing questions of antiquity and implications for the history of the ancestral 'Hiri' Maritime Trade	Australian Archaeology	70:39-54		A	Emo
	-7.44214	144.368	Hominidae	Homo	sapiens	Wk-23551	Sediment	Charcoal					1.647	=	0.03		1490	41	AMS radiocarbon BP											Gulf Province	2010	David B, Geneste J-M, Aplin K, Delannoy J-J, Araho N, Clarkson C, Connell K, Haberle S, Barker B, Lamb L, Stanisic J, Fairbairn A, Skelly R, Rowe C	The EMO Site (OAC), Gulf Province, Papua New Guinea: Resolving long-standing questions of antiquity and implications for the history of the ancestral 'Hiri' Maritime Trade	Australian Archaeology	70:39-54		A	Emo
	-32.3	141.5	Hominidae	Homo	sapiens	Wk-10281	Fireplace	Charcoal					1.653	=	0.052		1499	66	Radiocarbon BP											NSW	2006	Shiner JI	Artefact discard and accumulated patterns in stone artefact assemblage composition in surface archaeological deposits from Pine Point and Langwell Stations, western New South Wales	The Rangeland Journal	28:183-195		A	Pine Creek
	-17.75	145.51	Hominidae	Homo	sapiens	Wk-13569	Sediment	Charcoal					1.66	=	0.044		1505	58	Radiocarbon BP											QLD	2007	Cosgrove R, Field J, Ferrier A	The archaeology of Australia's tropical rainforests	Palaeogeography, Palaeoclimatology, Palaeoecology	251:150-173		A	Urumbal Pocket
	-35.12	150.21	Hominidae	Homo	sapiens	ANU-741	Sediment	Charcoal					1.695	=	0.09		1559	107	Radiocarbon BP											NSW	1980	Flood J	The Moth Hunters. Aboriginal Prehistory of the Australian Alps.	Australian Institute of Aboriginal Studies, Canberra.	na		A	Sassafras
	-32.3	141.5	Hominidae	Homo	sapiens	Wk-9993	Fireplace	Charcoal					1.747	=	0.076		1619	92	Radiocarbon BP											NSW	2006	Shiner JI	Artefact discard and accumulated patterns in stone artefact assemblage composition in surface archaeological deposits from Pine Point and Langwell Stations, western New South Wales	The Rangeland Journal	28:183-195		A	Pine Creek
	-33.37	151.18	Hominidae	Homo	sapiens	ANU-8135	Sediment	Charcoal					1.86	=	0.07		1747	88	Radiocarbon BP											NSW	2008	McDonald J	Dreamtime Superhighway: An Analysis of Sydney Rock Art and Prehistoric Information Exchange	Terra Australis	27		A	Upside-Down Man
	-7.44214	144.368	Hominidae	Homo	sapiens	Wk-23557	Sediment	Charcoal					1.86	=	0.03		1756	46	AMS radiocarbon BP											Gulf Province	2010	David B, Geneste J-M, Aplin K, Delannoy J-J, Araho N, Clarkson C, Connell K, Haberle S, Barker B, Lamb L, Stanisic J, Fairbairn A, Skelly R, Rowe C	The EMO Site (OAC), Gulf Province, Papua New Guinea: Resolving long-standing questions of antiquity and implications for the history of the ancestral 'Hiri' Maritime Trade	Australian Archaeology	70:39-54		A	Emo
	-7.44214	144.368	Hominidae	Homo	sapiens	Wk-23556	Sediment	Charcoal					1.864	=	0.033		1760	47	AMS radiocarbon BP											Gulf Province	2010	David B, Geneste J-M, Aplin K, Delannoy J-J, Araho N, Clarkson C, Connell K, Haberle S, Barker B, Lamb L, Stanisic J, Fairbairn A, Skelly R, Rowe C	The EMO Site (OAC), Gulf Province, Papua New Guinea: Resolving long-standing questions of antiquity and implications for the history of the ancestral 'Hiri' Maritime Trade	Australian Archaeology	70:39-54		A	Emo
	-38.06	140.66	Hominidae	Homo	sapiens	Beta-25005	Sediment	Charcoal					1.88	=	0.08		1770	98	Radiocarbon BP											SA	2011	Frankel D, Stern N	Karremarter - Mid to Late Holocene stone artefact production and use in the Lower Southeast of South Australia	Technical Reports of the Australian Museum	23:59-71		A	Piccaninnie Cave
	-7.33591	144.174	Hominidae	Homo	sapiens	Wk-19981	Sediment	Charcoal					1.965	=	0.046		1870	62	AMS radiocarbon BP											Gulf Province	2008	David B	Rethinking cultural chronologies and past landscape engagement in the Kopi region, Gulf Province, Papua New Guinea	The Holocene	18:463-479		A	KG141 Ossuary
	-32.98	150.9	Hominidae	Homo	sapiens	ANU-6054	Sediment	Charcoal					1.95	=	0.4		1937	461	Radiocarbon BP											NSW	2008	McDonald J, Veth P	Rock-art of the Western Desert and Pilbara: Pigment dates provide new perspectives on the role of art in the Australian Arid Zone	Australian Aboriginal Studies	1:4-21		A	Yengo
	-32.92	151.76	Hominidae	Homo	sapiens	Wk-26882	Sediment	Charcoal					2.055	=	0.03		1966	36	Radiocarbon BP											NSW	na	AN Williams unpub	na	na	na		A	Palais Royale
	-25.15	148.617	Hominidae	Homo	sapiens	ANU-12016	Sediment (associated with Macrozamia seeds)	Charcoal					2.08	=	0.08		2019	111	Radiocarbon BP											QLD	2008	Asmussen B	Anything more than a picnic? Re-considering arguments for ceremonial Macrozamia use in mid-Holocene Australia	Archaeology in Oceania	43:93-103		A	Wanderer's Cave
	-17.75	145.51	Hominidae	Homo	sapiens	Wk-13577	Sediment	Charcoal					2.143	=	0.048		2095	82	Radiocarbon BP											QLD	2007	Cosgrove R, Field J, Ferrier A	The archaeology of Australia's tropical rainforests	Palaeogeography, Palaeoclimatology, Palaeoecology	251:150-173		A	Urumbal Pocket
	-13.1	133.8	Hominidae	Homo	sapiens	Wk-28612	Sediment	Charcoal					2.165	=	0.03		2117	69	AMS radiocarbon BP											NT	2011	David B, Geneste J-M, Whear RL, Delannoy J-J, Katherine M, Gunn R, Clarkson C, Plisson H, Lee P, Petchey F, Rowe C, Barker B, Lamb L, Miller W, Hoerle S, James D, Boche E, Aplin K, McNiven IJ, Richards T, Fairbairn A, Matthews J	Nawarla Gabarnmang, a 45,180 +/- 910 cal BP site in Jawoyn country, Southwest Arnhem land Plateau	Australian Archaeology	73:73-77		A	Nawarla Gabarnmang
	-17.75	145.51	Hominidae	Homo	sapiens	Wk-13567	Sediment	Charcoal					2.201	=	0.046		2176	82	Radiocarbon BP											QLD	2007	Cosgrove R, Field J, Ferrier A	The archaeology of Australia's tropical rainforests	Palaeogeography, Palaeoclimatology, Palaeoecology	251:150-173		A	Urumbal Pocket
	-13.1	133.8	Hominidae	Homo	sapiens	Wk-28124	Sediment	Charcoal					2.264	=	0.03		2236	52	AMS radiocarbon BP											NT	2011	David B, Geneste J-M, Whear RL, Delannoy J-J, Katherine M, Gunn R, Clarkson C, Plisson H, Lee P, Petchey F, Rowe C, Barker B, Lamb L, Miller W, Hoerle S, James D, Boche E, Aplin K, McNiven IJ, Richards T, Fairbairn A, Matthews J	Nawarla Gabarnmang, a 45,180 +/- 910 cal BP site in Jawoyn country, Southwest Arnhem land Plateau	Australian Archaeology	73:73-77		A	Nawarla Gabarnmang
	-28.4	139.49	Hominidae	Homo	sapiens	ANU-7198	Fireplace	Charcoal					2.4	=	0.27		2416	327	Radiocarbon BP											SA	1983	Wasson RJ	The Cainozoic history of the Strzelecki and Simpson dunefields (Australia) and the origin of the desert dunes	Zeitschrift fur Geomorphologie NF	45:85-115		A	Simpson-Strzelecki Dunefields Site JSN
	-23.83	130.86	Hominidae	Homo	sapiens	AdTL-91001	Sediment	Quartz					2.44	=	0.22		2440	220	TL BP (selective bleach)											NT	1997	Smith MA, Prescott JR, Head MJ	Comparison of 14C and luminescence chronologies at puritjarra rock shelter, central Australia	Quaternary Science Reviews	16:299-320		A	Puritjarra Rockshelter
	-13.1	133.8	Hominidae	Homo	sapiens	Wk-30470	Sediment	Charcoal					2.491	=	0.025		2534	104	AMS radiocarbon BP											NT	2011	David B, Geneste J-M, Whear RL, Delannoy J-J, Katherine M, Gunn R, Clarkson C, Plisson H, Lee P, Petchey F, Rowe C, Barker B, Lamb L, Miller W, Hoerle S, James D, Boche E, Aplin K, McNiven IJ, Richards T, Fairbairn A, Matthews J	Nawarla Gabarnmang, a 45,180 +/- 910 cal BP site in Jawoyn country, Southwest Arnhem land Plateau	Australian Archaeology	73:73-77		A	Nawarla Gabarnmang
	-35.57	144.32	Hominidae	Homo	sapiens	Beta-7067	Sediment	Charcoal					2.49	=	0.06		2536	109	Radiocarbon BP											NSW	1984	Berryman A, Frankel D	Archaeological investigation of mounds on the Wakool River, NSW. Preliminary field report	retained in the NSW Department of Environment, Climate Change and Water's Aboriginal Heritage Information Management System - ref: 1016)	Unpublished Report for NSW National Parks and Wildlife Service (		A	M1
	-35.24	150.24	Hominidae	Homo	sapiens	ANU-8769	Sediment	Scattered charcoal					2.56	=	0.09		2578	118	Radiocarbon BP											NSW	1994	Boot P	Recent research into the prehistory of the hinterland of the south coast of New South Wales	In M.Sullivan, S. Brockwell & A. Webb (eds.) Archaeology in the North. Proceedings of the 1993 Australian Association Conference. Northern Australia Research Unit, The Australian National University, Darwin. Pp. 319-340.	Conference		A	AG 15 Blue Gum Flat
	-5.91043	150.118	Hominidae	Homo	sapiens	Beta-47048	Sediment	Charcoal					2.57	=	0.09		2585	119	Radiocarbon BP											West New Britain Province	1994	Pavlides C, Gosden C	35,000-year-old sites in the rainforests of West New Britain, Papua New Guinea	Antiquity	68:604-610		A	Yombon
	-5.91043	150.118	Hominidae	Homo	sapiens	Beta-1544	Wood	Charcoal (among flakes)					2.575	=	0.1		2589	126	Radiocarbon BP											West New Britain Province	1981	Specht J, Lilley I, Normu J	Radiocarbon Dates from West New Britain, Papua New Guinea	Australian Archaeology	12:13-16		A	Yombon
	-7.25622	144.138	Hominidae	Homo	sapiens	Wk-19974	Sediment	Charcoal					2.56	=	0.049		2591	95	AMS radiocarbon BP											Gulf Province	2008	David B	Rethinking cultural chronologies and past landscape engagement in the Kopi region, Gulf Province, Papua New Guinea	The Holocene	18:463-479		A	Epe Amoho Rockshelter
	-5.91043	150.118	Hominidae	Homo	sapiens	Beta-62320	Sediment	Charcoal					2.58	=	0.07		2596	107	Radiocarbon BP											West New Britain Province	1994	Pavlides C, Gosden C	35,000-year-old sites in the rainforests of West New Britain, Papua New Guinea	Antiquity	68:604-610		A	Yombon
	na	na	Hominidae	Homo	sapiens	Wk-30042	Sediment	Charcoal					2.551	=	0.026		2598	80	AMS radiocarbon BP											Central Province	2011	David B, McNiven IJ, Richards T, Connaughton SP, Leavesley M, Barker B, Rowe C	Lapita sites in the Central Province of mainland Papua New Guinea	World Archaeology	43:576-593		A	Moiapu
	-7.25622	144.138	Hominidae	Homo	sapiens	Wk-18924	Sediment	Charcoal					2.568	=	0.036		2607	86	AMS radiocarbon BP											Gulf Province	2008	David B	Rethinking cultural chronologies and past landscape engagement in the Kopi region, Gulf Province, Papua New Guinea	The Holocene	18:463-479		A	Epe Amoho Rockshelter
	-7.25622	144.138	Hominidae	Homo	sapiens	Wk-19970	Sediment	Charcoal					2.572	=	0.033		2613	84	AMS radiocarbon BP											Gulf Province	2008	David B	Rethinking cultural chronologies and past landscape engagement in the Kopi region, Gulf Province, Papua New Guinea	The Holocene	18:463-479		A	Epe Amoho Rockshelter
	-7.25622	144.138	Hominidae	Homo	sapiens	Wk-19973	Sediment	Charcoal					2.616	=	0.05		2646	96	AMS radiocarbon BP											Gulf Province	2008	David B	Rethinking cultural chronologies and past landscape engagement in the Kopi region, Gulf Province, Papua New Guinea	The Holocene	18:463-479		A	Epe Amoho Rockshelter
	-17.75	145.51	Hominidae	Homo	sapiens	Wk-13573	Sediment	Charcoal					2.628	=	0.051		2663	97	Radiocarbon BP											QLD	2007	Cosgrove R, Field J, Ferrier A	The archaeology of Australia's tropical rainforests	Palaeogeography, Palaeoclimatology, Palaeoecology	251:150-173		A	Urumbal Pocket
	-7.33591	144.174	Hominidae	Homo	sapiens	Wk-18890	Sediment	Charcoal					2.754	=	0.043		2820	44	AMS radiocarbon BP											Gulf Province	2008	David B	Rethinking cultural chronologies and past landscape engagement in the Kopi region, Gulf Province, Papua New Guinea	The Holocene	18:463-479		A	KG141 Ossuary
	-23.12	118.63	Hominidae	Homo	sapiens	Wk-22784	Sediment	Charcoal					2.766	=	0.032		2822	38	Radiocarbon BP											WA	2010	Law WB, Croopper DN, Petchey F	Djadjiling Rockshelter: 35,000 14C years of Aboriginal occupation in the Pilbara, Western Australia	Australian Archaeology	70:68-71		A	Djadjiling Rockshelter
	-23.83	130.86	Hominidae	Homo	sapiens	AdTL-91013	Sediment	Quartz					2.86	=	0.17		2860	170	TL BP (selective bleach)											NT	1997	Smith MA, Prescott JR, Head MJ	Comparison of 14C and luminescence chronologies at puritjarra rock shelter, central Australia	Quaternary Science Reviews	16:299-320		A	Puritjarra Rockshelter
	-32.98	150.9	Hominidae	Homo	sapiens	ANU-6215	Sediment	Charcoal					2.75	=	0.4		2863	497	Radiocarbon BP											NSW	2008	McDonald J, Veth P	Rock-art of the Western Desert and Pilbara: Pigment dates provide new perspectives on the role of art in the Australian Arid Zone	Australian Aboriginal Studies	1:4-21		A	Yengo
	-15.38	129	Hominidae	Homo	sapiens	?	Sediment	Quartz					18	=	0.56		18000	560	OSL BP											NT	2006	Ward IAK, Fullagar RLK, Boer-Mah T, Head LM, Ta√æon PSC, et al.///Ward et al., 2005	Comparison of sedimentation and occupation histories inside and outside rock shelters, Keep-River region, northwestern Australia	Geoarchaeology	21:1-27		A	Karlinga
	-32.98	150.9	Hominidae	Homo	sapiens	ANU-6056	Sediment	Charcoal					2.84	=	0.24		2950	298	Radiocarbon BP											NSW	2008	McDonald J, Veth P	Rock-art of the Western Desert and Pilbara: Pigment dates provide new perspectives on the role of art in the Australian Arid Zone	Australian Aboriginal Studies	1:4-21		A	Yengo
	-23.83	130.86	Hominidae	Homo	sapiens	AdTL-91005	Sediment	Quartz					3.04	=	0.16		3040	160	TL BP (selective bleach)											NT	1997	Smith MA, Prescott JR, Head MJ	Comparison of 14C and luminescence chronologies at puritjarra rock shelter, central Australia	Quaternary Science Reviews	16:299-320		A	Puritjarra Rockshelter
	-10.1167	142.15	Hominidae	Homo	sapiens	Wk-12956	Sediment	Charcoal					2.999	=	0.044		3115	79	AMS radiocarbon BP											QLD	2004	David B, McNiven I, Mitchell R, Orr M, Haberle S, Brady L, Crouch J	Badu 15 and the Papuan-Austronesian settlement of Torres Strait	Archaeology in Oceania	39:65-78		A	Badu
	-27.8206	152.154	Hominidae	Homo	sapiens	Beta-5898	Sediment	Charcoal					3.03	=	0.09		3156	126	Radiocarbon BP											QLD	1986	Morwood MJ	The archaeology of art: excavations at Maidenwell and Gatton shelters, southeast Queensland	Queensland Archaeological Research	3:88-132		A	Gatton Rockshelter
	-33.19	151.13	Hominidae	Homo	sapiens	SUA-932	Sediment	Charcoal					3.04	=	0.085		3169	121	Radiocarbon BP											NSW	1980	Vinnicombe P	Predilection and prediction: a study of Aboriginal sites in the Gosford-Wyong region	na	na		A	Black Hands Cave
	-15.43	129.16	Hominidae	Homo	sapiens	?	Sediment	Sediment - single aliquot (S)					2.3	=	0.3		2300	300	OSL BP											NT	1998	Roberts R, Bird M, Olley J, Galbraith R, Lawson E, Laslett G, Yoshida H, Jones R, Fullagar R, Jacobsen G, Hua Q	Optical and radiocarbon dating at Jinmium rock shelter in northern Australia	Nature	393:358-362		A	Jinmium Rockshelter
	-35.12	150.21	Hominidae	Homo	sapiens	ANU-742	Sediment	Charcoal					3.09	=	0.095		3227	127	Radiocarbon BP											NSW	1980	Flood J	The Moth Hunters. Aboriginal Prehistory of the Australian Alps.	Australian Institute of Aboriginal Studies, Canberra.	na		A	Sassafras
	-2.9595	151.391	Hominidae	Homo	sapiens	ANU-4972	Sediment	Charcoal					3.12	=	0.19		3266	234	Radiocarbon BP											New Ireland Province	1988	Allen J, Gosden C, Jones R, White JP	Pleistocene dates for the human occupation of New Ireland, northern Melanesia	Nature	331:707-709		A	Balof
	-13.1	133.8	Hominidae	Homo	sapiens	Wk-30471	Sediment	Charcoal					3.117	=	0.025		3285	47	AMS radiocarbon BP											NT	2011	David B, Geneste J-M, Whear RL, Delannoy J-J, Katherine M, Gunn R, Clarkson C, Plisson H, Lee P, Petchey F, Rowe C, Barker B, Lamb L, Miller W, Hoerle S, James D, Boche E, Aplin K, McNiven IJ, Richards T, Fairbairn A, Matthews J	Nawarla Gabarnmang, a 45,180 +/- 910 cal BP site in Jawoyn country, Southwest Arnhem land Plateau	Australian Archaeology	73:73-77		A	Nawarla Gabarnmang
	-33.82	151.01	Hominidae	Homo	sapiens	Wk-17436	Sediment	Charcoal					3.27	=	0.035		3454	51	Radiocarbon BP											NSW	2005a	Jo McDonald Cultural Heritage Management Pty Ltd	na	na	na		A	Sydney Basin RTA-G1
	-38	145.19	Hominidae	Homo	sapiens	KB-22	Sediment	Quartz					3.5	=	0.4		3500	400	OSL BP											VIC	2010	Hewitt G, Allen J	Site disturbance and archaeological integrity: the case of Bend Road, an open site in Melbourne spanning pre-LGM Pleistocene to late Holocene periods	Australian Archaeology	70:1-16		A	Bend Road
	-17.75	145.51	Hominidae	Homo	sapiens	Wk-11343	Sediment	Charcoal					3.339	=	0.066		3531	80	Radiocarbon BP											QLD	2007	Cosgrove R, Field J, Ferrier A	The archaeology of Australia's tropical rainforests	Palaeogeography, Palaeoclimatology, Palaeoecology	251:150-173		A	Urumbal Pocket
	-25.15	148.617	Hominidae	Homo	sapiens	ANU-12014	Sediment (associated with Macrozamia seeds)	Charcoal					3.34	=	0.07		3533	85	Radiocarbon BP											QLD	2008	Asmussen B	Anything more than a picnic? Re-considering arguments for ceremonial Macrozamia use in mid-Holocene Australia	Archaeology in Oceania	43:93-103		A	Wanderer's Cave
	-38	145.19	Hominidae	Homo	sapiens	KB-3	Sediment	Quartz					3.7	=	0.5		3700	500	OSL BP											VIC	2010	Hewitt G, Allen J	Site disturbance and archaeological integrity: the case of Bend Road, an open site in Melbourne spanning pre-LGM Pleistocene to late Holocene periods	Australian Archaeology	70:1-16		A	Bend Road
	-38.06	140.66	Hominidae	Homo	sapiens	Beta-25007	Sediment	Charcoal					3.55	=	0.09		3789	121	Radiocarbon BP											SA	2011	Frankel D, Stern N	Karremarter - Mid to Late Holocene stone artefact production and use in the Lower Southeast of South Australia	Technical Reports of the Australian Museum	23:59-71		A	Piccaninnie Cave
	-22.66	119.43	Hominidae	Homo	sapiens	Wk-2863	Sediment	Charcoal					3.63	=	0.07		3892	107	Radiocarbon BP											WA	2009	Morse K	Emerging from the abyss - archaeology in the Pilbara region of Western Australia	Archaeology in Oceania	44:1-5		A	Marillana
	-38	145.19	Hominidae	Homo	sapiens	KB7	Sediment	Quartz					3.9	=	0.4		3900	400	OSL BP											VIC	2010	Hewitt G, Allen J	Site disturbance and archaeological integrity: the case of Bend Road, an open site in Melbourne spanning pre-LGM Pleistocene to late Holocene periods	Australian Archaeology	70:1-16		A	Bend Road
	-15.44	129.18	Hominidae	Homo	sapiens	OZG-339	Charcoal	Charcoal					3.68	=	0.05		3962	80	AMS Radiocarbon BP (calibrated)											NT	2006	Ward IAK, Fullagar RLK, Boer-Mah T, Head LM, Ta√æon PSC, et al.	Comparison of sedimentation and occupation histories inside and outside rock shelters, Keep-River region, northwestern Australia	Geoarchaeology	21:1-27		A	Goorurarmum
	-5.91043	150.118	Hominidae	Homo	sapiens	Beta-45380	Sediment	Charcoal					3.76	=	0.09		4079	137	Radiocarbon BP											West New Britain Province	1994	Pavlides C, Gosden C	35,000-year-old sites in the rainforests of West New Britain, Papua New Guinea	Antiquity	68:604-610		A	Yombon
	-9.07545	147.267	Hominidae	Homo	sapiens	Wk-23357	Wood	Charcoal					3.938	=	0.034		4326	65	AMS radiocarbon BP											Central province	2010	Summerhayes GR, Leavesley M, Fairbairn A, Mandui H, Field J, Ford A, Fullagar R	Human adaptation and plant use in Highland New Guinea 49,000 to 44,000 years ago	Science	330:78-81		A	Joe's Garden AAXC
	-5.93043	150.118	Hominidae	Homo	sapiens	Beta-62317	Sediment	Charcoal					3.99	=	0.13		4403	199	Radiocarbon BP											West New Britain Province	1994	Pavlides C, Gosden C	35,000-year-old sites in the rainforests of West New Britain, Papua New Guinea	Antiquity	68:604-610		A	Eliva Hamlet
	-33.37	151.18	Hominidae	Homo	sapiens	ANU-8132	Sediment	Charcoal					4.03	=	0.14		4461	208	Radiocarbon BP											NSW	2008	McDonald J	Dreamtime Superhighway: An Analysis of Sydney Rock Art and Prehistoric Information Exchange	Terra Australis	27		A	Upside-Down Man
	-33.2	145.5	Hominidae	Homo	sapiens	ANUA-36	Bone (post-cranial fragments)	Collagen (amino acids)					4	=	1		4591	1236	AMS radiocarbon BP											NSW	2002	Gillespie R	Dating the first Australians	Radiocarbon	44:455-472		A	Willandra Lakes-burial
	-25.15	148.617	Hominidae	Homo	sapiens	ANU-12015	Sediment (associated with Macrozamia seeds)	Charcoal					4.15	=	0.07		4641	112	Radiocarbon BP											QLD	2008	Asmussen B	Anything more than a picnic? Re-considering arguments for ceremonial Macrozamia use in mid-Holocene Australia	Archaeology in Oceania	43:93-103		A	Wanderer's Cave
	-35.57	144.32	Hominidae	Homo	sapiens	Beta-7066	Sediment	Charcoal					4.16	=	0.3		4644	412	Radiocarbon BP											NSW	1984	Berryman A, Frankel D	Archaeological investigation of mounds on the Wakool River, NSW. Preliminary field report	retained in the NSW Department of Environment, Climate Change and Water's Aboriginal Heritage Information Management System - ref: 1016)	Unpublished Report for NSW National Parks and Wildlife Service (		A	M1
	-34.1	141.8	Hominidae	Homo	sapiens	GaK-1432	Bone	Bone					4.17	=	0.2		4649	285	Radiocarbon BP											VIC	1973	Blackwood R, Simpson KNG	Attitudes of Aboriginal skeletons excavated in the Murray Valley region between Mildura and Renmark, Australia	Memoirs of the National Museum of Victoria	34:99-150		A	Keera Station - Lybra Paddock - Site 16
	-19.2	143.2	Hominidae	Homo	sapiens	ANU-2631	Sediment	Charcoal					4.26	=	0.045		4739	78	Radiocarbon BP											QLD	2009	Wallis LA, Keys B, Moffat I, Fallon S	Gledswood Shelter 1: Initial radiocarbon dates from a Pleistocene aged rockshelter site in Northwest Queensland	Australian Archaeology	69:71-74		A	Gledswood Shelter
	-5.91043	150.118	Hominidae	Homo	sapiens	Beta-1545	Wood	Charcoal (among flakes)					4.27	=	0.13		4774	197	Radiocarbon BP											West New Britain Province	1981	Specht J, Lilley I, Normu J	Radiocarbon Dates from West New Britain, Papua New Guinea	Australian Archaeology	12:13-16		A	Yombon
	-33.82	151.01	Hominidae	Homo	sapiens	Wk-17432	Sediment	Charcoal					4.433	=	0.035		4973	89	Radiocarbon BP											NSW	2005a	Jo McDonald Cultural Heritage Management Pty Ltd	na	na	na		A	Sydney Basin RTA-G1
	-32.98	150.9	Hominidae	Homo	sapiens	ANU-6055	Sediment	Charcoal					4.59	=	0.3		5191	377	Radiocarbon BP											NSW	2008	McDonald J, Veth P	Rock-art of the Western Desert and Pilbara: Pigment dates provide new perspectives on the role of art in the Australian Arid Zone	Australian Aboriginal Studies	1:4-21		A	Yengo
	-17.75	145.51	Hominidae	Homo	sapiens	Wk-11344	Sediment	Charcoal					4.887	=	0.093		5571	121	Radiocarbon BP											QLD	2007	Cosgrove R, Field J, Ferrier A	The archaeology of Australia's tropical rainforests	Palaeogeography, Palaeoclimatology, Palaeoecology	251:150-173		A	Urumbal Pocket
	-5.91043	150.118	Hominidae	Homo	sapiens	Beta-62322	Sediment	Charcoal					5.22	=	0.18		5950	200	Radiocarbon BP											West New Britain Province	1994	Pavlides C, Gosden C	35,000-year-old sites in the rainforests of West New Britain, Papua New Guinea	Antiquity	68:604-610		A	Yombon
	-15.43	129.16	Hominidae	Homo	sapiens	?	Sediment	Sediment - single aliquot (S)					4.5	=	0.3		4500	300	OSL BP											NT	1998	Roberts R, Bird M, Olley J, Galbraith R, Lawson E, Laslett G, Yoshida H, Jones R, Fullagar R, Jacobsen G, Hua Q	Optical and radiocarbon dating at Jinmium rock shelter in northern Australia	Nature	393:358-362		A	Jinmium Rockshelter
	-15.43	129.16	Hominidae	Homo	sapiens	?	Sediment	Sediment - single grain (G1)					5.6	=	0.4		5600	400	OSL BP											NT	1998	Roberts R, Bird M, Olley J, Galbraith R, Lawson E, Laslett G, Yoshida H, Jones R, Fullagar R, Jacobsen G, Hua Q	Optical and radiocarbon dating at Jinmium rock shelter in northern Australia	Nature	393:358-362		A	Jinmium Rockshelter
	-12.7482	141.911	Hominidae	Homo	sapiens	ANU-4837	Shell mound	Shell (Mollusc whole shell)					5.51	=	0.16		6247	182	Radiocarbon BP											QLD	1994	Bailey G, Chappell J, Cribb R	The origin of "Anadara" shell mounds at Weipa, North Queensland, Australia	Archaeology in Oceania	29:69-80		A	Hey River
	-5.91043	150.118	Hominidae	Homo	sapiens	Beta-52322	Sediment	Charcoal					5.71	=	0.07		6462	87	Radiocarbon BP											West New Britain Province	1994	Pavlides C, Gosden C	35,000-year-old sites in the rainforests of West New Britain, Papua New Guinea	Antiquity	68:604-610		A	Yombon
	-13.06	132.89	Hominidae	Homo	sapiens	ANUA-8131	Sediment	Charcoal	hp-ABOX	ABOX			5.88	=	0.15		6668	181	Radiocarbon BP (hp-ABOX)											NT	2002	Bird MI, Turney CSM, Fifield LK, Jones R, Ayliffe LK, Palmer A, Cresswell R, Robertson S	Radiocarbon analysis of the early archaeological site of Nauwalabila I, Arnhem Land, Australia: implications for sample suitability and stratigraphic integrity	Quaternary Science Reviews	21:1061-1075		A	Nauwalabila
	-10.1167	142.15	Hominidae	Homo	sapiens	Wk-11946	Sediment	Charcoal					5.966	=	0.039		6750	56	AMS radiocarbon BP											QLD	2004	David B, McNiven I, Mitchell R, Orr M, Haberle S, Brady L, Crouch J	Badu 15 and the Papuan-Austronesian settlement of Torres Strait	Archaeology in Oceania	39:65-78		A	Badu
	-5.91043	150.118	Hominidae	Homo	sapiens	NZA-1905	Sediment	Charcoal					5.972	=	0.076		6764	101	Radiocarbon BP											West New Britain Province	1994	Pavlides C, Gosden C	35,000-year-old sites in the rainforests of West New Britain, Papua New Guinea	Antiquity	68:604-610		A	Yombon
	-32.98	150.9	Hominidae	Homo	sapiens	ANU-6059	Sediment	Charcoal					5.98	=	0.29		6802	320	Radiocarbon BP											NSW	2008	McDonald J, Veth P	Rock-art of the Western Desert and Pilbara: Pigment dates provide new perspectives on the role of art in the Australian Arid Zone	Australian Aboriginal Studies	1:4-21		A	Yengo
	-33.82	151.01	Hominidae	Homo	sapiens	Wk-17434	Sediment	Charcoal					6.078	=	0.054		6888	86	Radiocarbon BP											NSW	2005a	Jo McDonald Cultural Heritage Management Pty Ltd	na	na	na		A	Sydney Basin RTA-G1
	-19.783	143.283	Hominidae	Homo	sapiens	ANU-11895	Sediment	Charcoal					6.09	=	0.1		6919	137	Radiocarbon BP											QLD	2004	Wallis LA, Smith D, Smith H	Recent archaeological surveys on Middle Park Station, Northwest Queensland	Australian Archaeology	59:43-50		A	MP102
	-15.72	137.08	Hominidae	Homo	sapiens	Wk-14667	Sediment	Shell (Polymesoda erosa)					6.434	=	0.098		6926	124	Radiocarbon BP											NT	2009	Brockwell S, Faulkner P, Bourke P, Clarke A, Crassweller C, Guse D, Meehan B, Sim R	Radiocarbon dates from the Top End: A cultural chronology for the Northern Territory Coastal Plains	Australian Aboriginal Studies	1:54-76		A	Wobuya Shelter Rockshelter
	-23.12	118.63	Hominidae	Homo	sapiens	Wk-23306	Sediment	Charcoal					6.13	=	0.038		6964	82	AMS radiocarbon BP											WA	2010	Law WB, Croopper DN, Petchey F	Djadjiling Rockshelter: 35,000 14C years of Aboriginal occupation in the Pilbara, Western Australia	Australian Archaeology	70:68-71		A	Djadjiling Rockshelter
	-9.08447	147.255	Hominidae	Homo	sapiens	Wk-27070	Wood	Charcoal					6.24	=	0.03		7094	63	AMS radiocarbon BP											Central province	2010	Summerhayes GR, Leavesley M, Fairbairn A, Mandui H, Field J, Ford A, Fullagar R	Human adaptation and plant use in Highland New Guinea 49,000 to 44,000 years ago	Science	330:78-81		A	Vilakuav
	-40.5667	144.75	Hominidae	Homo	sapiens	ANU-1773	Sediment	Charcoal					6.6	=	0.09		7458	81	Radiocarbon BP											TAS	1981	Stockton ED	Radiocarbon Dates for Archaeological Sites in Tasmania	Australian Archaeology	12:97-101		A	Cave Bay Cave
	-13.06	132.89	Hominidae	Homo	sapiens	ANUA-9909	Sediment	Charcoal	float-ABOX	ABOX			6.96	=	0.14		7769	125	Radiocarbon BP (float-ABOX)											NT	2002	Bird MI, Turney CSM, Fifield LK, Jones R, Ayliffe LK, Palmer A, Cresswell R, Robertson S	Radiocarbon analysis of the early archaeological site of Nauwalabila I, Arnhem Land, Australia: implications for sample suitability and stratigraphic integrity	Quaternary Science Reviews	21:1061-1075		A	Nauwalabila
	-15.3	131.21	Hominidae	Homo	sapiens	ANU-11763	Charcoal	Charcoal					7.04	=	0.07		7827	75	Radiocarbon BP											NT	2007	Clarkson C	Lithics in the Land of the Lightning Brothers: The Arhaeology of Wardaman Country, Northern Territory	Terra Australis	vol. 25		A	Gordolya
	-13.06	132.89	Hominidae	Homo	sapiens	ANUA-8223	Sediment	Charcoal	hp-ABOX	ABOX			7.05	=	0.14		7841	131	Radiocarbon BP (hp-ABOX)											NT	2002	Bird MI, Turney CSM, Fifield LK, Jones R, Ayliffe LK, Palmer A, Cresswell R, Robertson S	Radiocarbon analysis of the early archaeological site of Nauwalabila I, Arnhem Land, Australia: implications for sample suitability and stratigraphic integrity	Quaternary Science Reviews	21:1061-1075		A	Nauwalabila
	-17.75	145.51	Hominidae	Homo	sapiens	Wk-13571	Sediment	Charcoal					7.212	=	0.046		7993	55	Radiocarbon BP											QLD	2007	Cosgrove R, Field J, Ferrier A	The archaeology of Australia's tropical rainforests	Palaeogeography, Palaeoclimatology, Palaeoecology	251:150-173		A	Urumbal Pocket
	-15.72	137.08	Hominidae	Homo	sapiens	Wk-14668	Sediment	Shell (Polymesoda erosa)					7.55	=	0.048		8013	57	Radiocarbon BP											NT	2009	Brockwell S, Faulkner P, Bourke P, Clarke A, Crassweller C, Guse D, Meehan B, Sim R	Radiocarbon dates from the Top End: A cultural chronology for the Northern Territory Coastal Plains	Australian Aboriginal Studies	1:54-76		A	Wobuya Shelter Rockshelter
	-9.08045	147.259	Hominidae	Homo	sapiens	Wk-23353	Wood	Charcoal					7.417	=	0.032		8204	71	AMS radiocarbon BP											Central province	2010	Summerhayes GR, Leavesley M, Fairbairn A, Mandui H, Field J, Ford A, Fullagar R	Human adaptation and plant use in Highland New Guinea 49,000 to 44,000 years ago	Science	330:78-81		A	South Kov
	-17.75	145.51	Hominidae	Homo	sapiens	Wk-13578	Sediment	Charcoal					7.445	=	0.068		8226	85	Radiocarbon BP											QLD	2007	Cosgrove R, Field J, Ferrier A	The archaeology of Australia's tropical rainforests	Palaeogeography, Palaeoclimatology, Palaeoecology	251:150-173		A	Urumbal Pocket
	-13.06	132.89	Hominidae	Homo	sapiens	ANUA-9904	Sediment	Charcoal	float-ABOX	ABOX			7.56	=	0.14		8318	145	Radiocarbon BP (float-ABOX)											NT	2002	Bird MI, Turney CSM, Fifield LK, Jones R, Ayliffe LK, Palmer A, Cresswell R, Robertson S	Radiocarbon analysis of the early archaeological site of Nauwalabila I, Arnhem Land, Australia: implications for sample suitability and stratigraphic integrity	Quaternary Science Reviews	21:1061-1075		A	Nauwalabila
	-15.43	129.16	Hominidae	Homo	sapiens	W-1754	Sediment	Artefact					8.5	=	1		8500	1000	TL BP											NT	1996	Fullagar RLK, Price DM, Head LM	Early human occupation of northern Australia: archaeology and thermoluminescence dating of Jinmium rock-shelter, Northern Territory	Antiquity	70:751-773		A	Jinmium Rockshelter
	-2.9595	151.391	Hominidae	Homo	sapiens	ANU-4849	Sediment	Charcoal					7.68	=	0.51		8618	575	Radiocarbon BP											New Ireland Province	1988	Allen J, Gosden C, Jones R, White JP	Pleistocene dates for the human occupation of New Ireland, northern Melanesia	Nature	331:707-709		A	Balof
	-15.83	137.1	Hominidae	Homo	sapiens	ANU-12034	Sediment	Charcoal					8.08	=	0.2		8939	257	Radiocarbon BP											NT	2009	Brockwell S, Faulkner P, Bourke P, Clarke A, Crassweller C, Guse D, Meehan B, Sim R	Radiocarbon dates from the Top End: A cultural chronology for the Northern Territory Coastal Plains	Australian Aboriginal Studies	1:54-76		A	Mudunburra Rockshelter
	-33.82	151.01	Hominidae	Homo	sapiens	Wk-17433	Sediment	Charcoal					8.206	=	0.051		9127	83	Radiocarbon BP											NSW	2005a	Jo McDonald Cultural Heritage Management Pty Ltd	na	na	na		A	Sydney Basin RTA-G1
	-13.1	133.8	Hominidae	Homo	sapiens	Wk-28611	Sediment	Charcoal					8.616	=	0.034		9540	29	AMS radiocarbon BP											NT	2011	David B, Geneste J-M, Whear RL, Delannoy J-J, Katherine M, Gunn R, Clarkson C, Plisson H, Lee P, Petchey F, Rowe C, Barker B, Lamb L, Miller W, Hoerle S, James D, Boche E, Aplin K, McNiven IJ, Richards T, Fairbairn A, Matthews J	Nawarla Gabarnmang, a 45,180 +/- 910 cal BP site in Jawoyn country, Southwest Arnhem land Plateau	Australian Archaeology	73:73-77		A	Nawarla Gabarnmang
	-13.06	132.89	Hominidae	Homo	sapiens	ANUA-9512	Sediment	Charcoal	hp-ABOX	ABOX			8.75	=	0.1		9759	163	Radiocarbon BP (hp-ABOX)											NT	2002	Bird MI, Turney CSM, Fifield LK, Jones R, Ayliffe LK, Palmer A, Cresswell R, Robertson S	Radiocarbon analysis of the early archaeological site of Nauwalabila I, Arnhem Land, Australia: implications for sample suitability and stratigraphic integrity	Quaternary Science Reviews	21:1061-1075		A	Nauwalabila
	-23.83	130.86	Hominidae	Homo	sapiens	AdTL-91006	Sediment	Quartz					10	=	0.6		10000	600	TL BP (selective bleach)											NT	1997	Smith MA, Prescott JR, Head MJ	Comparison of 14C and luminescence chronologies at puritjarra rock shelter, central Australia	Quaternary Science Reviews	16:299-320		A	Puritjarra Rockshelter
	-13.1	133.8	Hominidae	Homo	sapiens	Wk-28125	Sediment	Charcoal					8.924	=	0.031		10019	95	AMS radiocarbon BP											NT	2011	David B, Geneste J-M, Whear RL, Delannoy J-J, Katherine M, Gunn R, Clarkson C, Plisson H, Lee P, Petchey F, Rowe C, Barker B, Lamb L, Miller W, Hoerle S, James D, Boche E, Aplin K, McNiven IJ, Richards T, Fairbairn A, Matthews J	Nawarla Gabarnmang, a 45,180 +/- 910 cal BP site in Jawoyn country, Southwest Arnhem land Plateau	Australian Archaeology	73:73-77		A	Nawarla Gabarnmang
	-31.48	129.42	Hominidae	Homo	sapiens	Ox(OD)AC150	Sediment	Quartz					10.1	=	0.6		10100	600	OSL BP											WA	1996	Roberts RG, Spooner NA, Jones R, Cane S, Olley JM, Murray AS, Head MJ	Preliminary luminescence dates for archaeological sediments on the Nullarbor Plain, South Australia	Australian Archaeology	42:7-16		A	Allen's Cave
	-13.1	133.8	Hominidae	Homo	sapiens	Wk-28613	Sediment	Charcoal					9.287	=	0.03		10409	71	AMS radiocarbon BP											NT	2011	David B, Geneste J-M, Whear RL, Delannoy J-J, Katherine M, Gunn R, Clarkson C, Plisson H, Lee P, Petchey F, Rowe C, Barker B, Lamb L, Miller W, Hoerle S, James D, Boche E, Aplin K, McNiven IJ, Richards T, Fairbairn A, Matthews J	Nawarla Gabarnmang, a 45,180 +/- 910 cal BP site in Jawoyn country, Southwest Arnhem land Plateau	Australian Archaeology	73:73-77		A	Nawarla Gabarnmang
	-31.48	129.42	Hominidae	Homo	sapiens	ANU-6850	Fireplace	Charcoal (hearth)					9.27	=	0.14		10442	189	Radiocarbon BP											WA	1996	Roberts RG, Spooner NA, Jones R, Cane S, Olley JM, Murray AS, Head MJ	Preliminary luminescence dates for archaeological sediments on the Nullarbor Plain, South Australia	Australian Archaeology	42:7-16		A	Allen's Cave
	-13.06	132.89	Hominidae	Homo	sapiens	ANUA-9903	Sediment	Charcoal	float-ABOX	ABOX			9.28	=	0.18		10470	262	Radiocarbon BP (float-ABOX)											NT	2002	Bird MI, Turney CSM, Fifield LK, Jones R, Ayliffe LK, Palmer A, Cresswell R, Robertson S	Radiocarbon analysis of the early archaeological site of Nauwalabila I, Arnhem Land, Australia: implications for sample suitability and stratigraphic integrity	Quaternary Science Reviews	21:1061-1075		A	Nauwalabila
	-31.48	129.42	Hominidae	Homo	sapiens	ANU-6849	Fireplace	Charcoal (hearth)					9.53	=	0.19		10798	266	Radiocarbon BP											WA	1996	Roberts RG, Spooner NA, Jones R, Cane S, Olley JM, Murray AS, Head MJ	Preliminary luminescence dates for archaeological sediments on the Nullarbor Plain, South Australia	Australian Archaeology	42:7-16		A	Allen's Cave
	-7.33501	144.175	Hominidae	Homo	sapiens	Wk-18918	Sediment	Charcoal					9.526	=	0.066		10808	155	AMS radiocarbon BP											Gulf Province	2008	David B	Rethinking cultural chronologies and past landscape engagement in the Kopi region, Gulf Province, Papua New Guinea	The Holocene	18:463-479		A	OJP Ossuary
	-7.33501	144.175	Hominidae	Homo	sapiens	Wk-19986	Sediment	Charcoal					9.587	=	0.097		10889	161	AMS radiocarbon BP											Gulf Province	2008	David B	Rethinking cultural chronologies and past landscape engagement in the Kopi region, Gulf Province, Papua New Guinea	The Holocene	18:463-479		A	OJP Ossuary
	-13.1	133.8	Hominidae	Homo	sapiens	Wk-28126	Sediment	Charcoal					9.67	=	0.034		10975	118	AMS radiocarbon BP											NT	2011	David B, Geneste J-M, Whear RL, Delannoy J-J, Katherine M, Gunn R, Clarkson C, Plisson H, Lee P, Petchey F, Rowe C, Barker B, Lamb L, Miller W, Hoerle S, James D, Boche E, Aplin K, McNiven IJ, Richards T, Fairbairn A, Matthews J	Nawarla Gabarnmang, a 45,180 +/- 910 cal BP site in Jawoyn country, Southwest Arnhem land Plateau	Australian Archaeology	73:73-77		A	Nawarla Gabarnmang
	-7.33501	144.175	Hominidae	Homo	sapiens	Wk-19985	Sediment	Charcoal					9.781	=	0.098		11085	168	AMS radiocarbon BP											Gulf Province	2008	David B	Rethinking cultural chronologies and past landscape engagement in the Kopi region, Gulf Province, Papua New Guinea	The Holocene	18:463-479		A	OJP Ossuary
	-2.9595	151.391	Hominidae	Homo	sapiens	ANU-4973	Sediment	Charcoal					9.97	=	0.39		11512	579	Radiocarbon BP											New Ireland Province	1988	Allen J, Gosden C, Jones R, White JP	Pleistocene dates for the human occupation of New Ireland, northern Melanesia	Nature	331:707-709		A	Balof
	-38	145.19	Hominidae	Homo	sapiens	KB-9	Sediment	Quartz					11.6	=	1.2		11600	1200	OSL BP											VIC	2010	Hewitt G, Allen J	Site disturbance and archaeological integrity: the case of Bend Road, an open site in Melbourne spanning pre-LGM Pleistocene to late Holocene periods	Australian Archaeology	70:1-16		A	Bend Road
	-23.83	130.86	Hominidae	Homo	sapiens	ANUA-12307	Sediment	Charcoal	ABOX-SC	ABOX			10.11	=	0.25		11711	403	AMS Radiocarbon BP (ABOX-SC)											NT	1997	Smith MA, Prescott JR, Head MJ	Comparison of 14C and luminescence chronologies at puritjarra rock shelter, central Australia	Quaternary Science Reviews	16:299-320		A	Puritjarra Rockshelter
	-12.29	132.56	Hominidae	Homo	sapiens	ANUA-9913	Sediment	Charcoal	float-ABOX	ABOX			10.33	=	0.15		12041	291	Radiocarbon BP (float-ABOX)											NT	2002	Bird MI, Turney CSM, Fifield LK, Jones R, Ayliffe LK, Palmer A, Cresswell R, Robertson S	Radiocarbon analysis of the early archaeological site of Nauwalabila I, Arnhem Land, Australia: implications for sample suitability and stratigraphic integrity	Quaternary Science Reviews	21:1061-1075		A	Malakunanja
	-28.4	139.49	Hominidae	Homo	sapiens	ANU-7197	Fireplace	Charcoal					10.5	=	0.23		12219	335	Radiocarbon BP											SA	1983	Wasson RJ	The Cainozoic history of the Strzelecki and Simpson dunefields (Australia) and the origin of the desert dunes	Zeitschrift fur Geomorphologie NF	45:85-115		A	Simpson-Strzelecki Dunefields Site JSN
	-38	145.19	Hominidae	Homo	sapiens	KB-11	Sediment	Quartz					12.3	=	0.1		12300	100	OSL BP											VIC	2010	Hewitt G, Allen J	Site disturbance and archaeological integrity: the case of Bend Road, an open site in Melbourne spanning pre-LGM Pleistocene to late Holocene periods	Australian Archaeology	70:1-16		A	Bend Road
	-12.29	132.56	Hominidae	Homo	sapiens	ANUA-9915	Sediment	Charcoal	float-ABOX	ABOX			10.81	=	0.2		12644	245	Radiocarbon BP (float-ABOX)											NT	2002	Bird MI, Turney CSM, Fifield LK, Jones R, Ayliffe LK, Palmer A, Cresswell R, Robertson S	Radiocarbon analysis of the early archaeological site of Nauwalabila I, Arnhem Land, Australia: implications for sample suitability and stratigraphic integrity	Quaternary Science Reviews	21:1061-1075		A	Malakunanja
	-34.45	143.93	Hominidae	Homo	sapiens	NZA-1069	Bone	Collagen					11.44	=	0.16		13250	154	AMS Radiocarbon BP											NSW	2010	Brown P	Nacurrie 1: Mark of ancient Java, or a caring mother√Üs hands, in terminal Pleistocene Australia?	Journal of Human Evolution	59:168-187		A	Nacurrie
	-7.33501	144.175	Hominidae	Homo	sapiens	Wk-18919	Sediment	Charcoal					11.602	=	0.07		13390	71	AMS radiocarbon BP											Gulf Province	2008	David B	Rethinking cultural chronologies and past landscape engagement in the Kopi region, Gulf Province, Papua New Guinea	The Holocene	18:463-479		A	OJP Ossuary
	-13.06	132.89	Hominidae	Homo	sapiens	Ox(OD)K172	Sediment	Sediment					13.5	=	0.9		13500	900	OSL BP											NT	1993	Roberts RG, Jones R, Smith MA	Optical dating at Deaf Adder Gorge, Northern Territory, indicates human occupation between 53,000 and 60,000 years ago	Australian Archaeology	37:58-59		A	Nauwalabila
	-13.1	133.8	Hominidae	Homo	sapiens	Wk-28619	Sediment	Charcoal					11.907	=	0.04		13670	58	AMS radiocarbon BP											NT	2011	David B, Geneste J-M, Whear RL, Delannoy J-J, Katherine M, Gunn R, Clarkson C, Plisson H, Lee P, Petchey F, Rowe C, Barker B, Lamb L, Miller W, Hoerle S, James D, Boche E, Aplin K, McNiven IJ, Richards T, Fairbairn A, Matthews J	Nawarla Gabarnmang, a 45,180 +/- 910 cal BP site in Jawoyn country, Southwest Arnhem land Plateau	Australian Archaeology	73:73-77		A	Nawarla Gabarnmang
	-32.6	151.05	Hominidae	Homo	sapiens	ANU-1580	Sediment	Quartz					13.7	=	3		13700	3000	OSL BP											NSW	2009	Scarp Archaeology	Warkwoth Sands archaeological project	Retained in the NSW Department of Environment, Climate Change and Water's Aboriginal Heritage Information Management System - ref: 101702	Unpublished Report to Rio Tinto Coal Australia		A	Warkworth Sand Sheet
	-37.73	144.83	Hominidae	Homo	sapiens	Wk-23580	Sediment	Charcoal					11.843	=	0.34		13802	471	Radiocarbon BP											VIC	2011	Canning S, Griffin D, Flynn V, Ricardi P	Recent archaeological excavations of Pleistocene deposits at Brimbank Park, Keilor, Victoria	Archaeological Heritage	2: 25-35		A	Brimbank Park
	-13.1	133.8	Hominidae	Homo	sapiens	Wk-28622	Sediment	Charcoal					12.261	=	0.043		14118	83	AMS radiocarbon BP											NT	2011	David B, Geneste J-M, Whear RL, Delannoy J-J, Katherine M, Gunn R, Clarkson C, Plisson H, Lee P, Petchey F, Rowe C, Barker B, Lamb L, Miller W, Hoerle S, James D, Boche E, Aplin K, McNiven IJ, Richards T, Fairbairn A, Matthews J	Nawarla Gabarnmang, a 45,180 +/- 910 cal BP site in Jawoyn country, Southwest Arnhem land Plateau	Australian Archaeology	73:73-77		A	Nawarla Gabarnmang
	-37.73	144.83	Hominidae	Homo	sapiens	Wk-23579	Sediment	Charcoal					12.422	=	0.128		14506	273	Radiocarbon BP											VIC	2011	Canning S, Griffin D, Flynn V, Ricardi P	Recent archaeological excavations of Pleistocene deposits at Brimbank Park, Keilor, Victoria	Archaeological Heritage	2: 25-35		A	Brimbank Park
	-13.1	133.8	Hominidae	Homo	sapiens	Wk-28617	Sediment	Charcoal					12.599	=	0.042		14866	156	AMS radiocarbon BP											NT	2011	David B, Geneste J-M, Whear RL, Delannoy J-J, Katherine M, Gunn R, Clarkson C, Plisson H, Lee P, Petchey F, Rowe C, Barker B, Lamb L, Miller W, Hoerle S, James D, Boche E, Aplin K, McNiven IJ, Richards T, Fairbairn A, Matthews J	Nawarla Gabarnmang, a 45,180 +/- 910 cal BP site in Jawoyn country, Southwest Arnhem land Plateau	Australian Archaeology	73:73-77		A	Nawarla Gabarnmang
	-23.12	118.63	Hominidae	Homo	sapiens	Wk-23307	Sediment	Charcoal					12.621	=	0.063		14881	181	AMS radiocarbon BP											WA	2010	Law WB, Croopper DN, Petchey F	Djadjiling Rockshelter: 35,000 14C years of Aboriginal occupation in the Pilbara, Western Australia	Australian Archaeology	70:68-71		A	Djadjiling Rockshelter
	-12.29	132.56	Hominidae	Homo	sapiens	KTL-165	Sediment	Sediment					15	=	2.5		15000	2500	TL BP											NT	1990	Roberts RG, Jones R, Smith MA	Thermoluminescence dating of a 50,000-year-old human occupation site in northern Australia	Nature	345:153-156		A	Malakunanja
	-13.06	132.89	Hominidae	Homo	sapiens	ANUA-9902	Sediment	Charcoal	float-ABOX	ABOX			12.73	=	0.14		15015	295	Radiocarbon BP (float-ABOX)											NT	2002	Bird MI, Turney CSM, Fifield LK, Jones R, Ayliffe LK, Palmer A, Cresswell R, Robertson S	Radiocarbon analysis of the early archaeological site of Nauwalabila I, Arnhem Land, Australia: implications for sample suitability and stratigraphic integrity	Quaternary Science Reviews	21:1061-1075		A	Nauwalabila
	-38	145.19	Hominidae	Homo	sapiens	KB-1	Sediment	Quartz					15.1	=	1.3		15100	1300	OSL BP											VIC	2010	Hewitt G, Allen J	Site disturbance and archaeological integrity: the case of Bend Road, an open site in Melbourne spanning pre-LGM Pleistocene to late Holocene periods	Australian Archaeology	70:1-16		A	Bend Road
	-13.1	133.8	Hominidae	Homo	sapiens	Wk-28620	Sediment	Charcoal					12.746	=	0.043		15125	97	AMS radiocarbon BP											NT	2011	David B, Geneste J-M, Whear RL, Delannoy J-J, Katherine M, Gunn R, Clarkson C, Plisson H, Lee P, Petchey F, Rowe C, Barker B, Lamb L, Miller W, Hoerle S, James D, Boche E, Aplin K, McNiven IJ, Richards T, Fairbairn A, Matthews J	Nawarla Gabarnmang, a 45,180 +/- 910 cal BP site in Jawoyn country, Southwest Arnhem land Plateau	Australian Archaeology	73:73-77		A	Nawarla Gabarnmang
	-12.29	132.56	Hominidae	Homo	sapiens	ANUA-9914	Sediment	Charcoal	float-ABOX	ABOX			13.05	=	0.21		15564	323	Radiocarbon BP (float-ABOX)											NT	2002	Bird MI, Turney CSM, Fifield LK, Jones R, Ayliffe LK, Palmer A, Cresswell R, Robertson S	Radiocarbon analysis of the early archaeological site of Nauwalabila I, Arnhem Land, Australia: implications for sample suitability and stratigraphic integrity	Quaternary Science Reviews	21:1061-1075		A	Malakunanja
	-28.4	139.49	Hominidae	Homo	sapiens	ANU-2279	Fireplace	Charcoal					13.15	=	0.83		15754	1187	Radiocarbon BP											SA	1983	Wasson RJ	The Cainozoic history of the Strzelecki and Simpson dunefields (Australia) and the origin of the desert dunes	Zeitschrift fur Geomorphologie NF	45:85-115		A	Simpson-Strzelecki Dunefields Site JSN
	-19.2	143.2	Hominidae	Homo	sapiens	Wk-19350	Sediment	Charcoal					13.185	=	0.075		15774	144	Radiocarbon BP											QLD	2009	Wallis LA, Keys B, Moffat I, Fallon S	Gledswood Shelter 1: Initial radiocarbon dates from a Pleistocene aged rockshelter site in Northwest Queensland	Australian Archaeology	69:71-74		A	Gledswood Shelter
	-13.06	132.89	Hominidae	Homo	sapiens	ANUA-9905	Sediment	Charcoal	float-ABOX	ABOX			13.29	=	0.18		15904	272	Radiocarbon BP (float-ABOX)											NT	2002	Bird MI, Turney CSM, Fifield LK, Jones R, Ayliffe LK, Palmer A, Cresswell R, Robertson S	Radiocarbon analysis of the early archaeological site of Nauwalabila I, Arnhem Land, Australia: implications for sample suitability and stratigraphic integrity	Quaternary Science Reviews	21:1061-1075		A	Nauwalabila
	-12.27	132.57	Hominidae	Homo	sapiens	KTL-125	Sediment	Quartz (80-115 microns)					16	=	5		16000	5000	TL BP											NT	1990	Roberts RG, Jones R, Smith MA	Thermoluminescence dating of a 50,000-year-old human occupation site in northern Australia	Nature	345:153-156		A	Malangangerr Rockshelter
	-42.44	145.83	Hominidae	Homo	sapiens	ANU-3982	Sediment	Charcoal					13.41	=	0.33		16101	499	Radiocarbon BP											TAS	1996	Stern N & Allen J	Pallawa Trounta shelter	In J. Allen (ed.) Report of the Southern Forests Archaeological Project. Volume 1. Site descriptions, stratigraphies and chronologies. La Trobe University, Melbourne. Pp.169-193.	na		A	Pallawa Trounta
	-38	145.19	Hominidae	Homo	sapiens	KB-18	Sediment	Quartz					16.3	=	1.9		16300	1900	OSL BP											VIC	2010	Hewitt G, Allen J	Site disturbance and archaeological integrity: the case of Bend Road, an open site in Melbourne spanning pre-LGM Pleistocene to late Holocene periods	Australian Archaeology	70:1-16		A	Bend Road
	-42.61	146.42	Hominidae	Homo	sapiens	R11769 / NZA-564	Sediment	Charcoal					13.84	=	0.16		16698	252	Radiocarbon BP											TAS	1991	Brown S, Kee S, McGowan A, Middleton G, Nash M, Prince B, Ricketts N, West D	A preliminary survey for Aboriginal sites in the Denison River Valley March 1989	Australian Archaeology	32:26-37		A	Condominium Cliffs Rockshelter
	-28.4	139.49	Hominidae	Homo	sapiens	ANU-2278	Fireplace	Charcoal					13.85	=	0.19		16718	289	Radiocarbon BP											SA	1983	Wasson RJ	The Cainozoic history of the Strzelecki and Simpson dunefields (Australia) and the origin of the desert dunes	Zeitschrift fur Geomorphologie NF	45:85-115		A	Simpson-Strzelecki Dunefields Site JSN
	-13.06	132.89	Hominidae	Homo	sapiens	ANUA-9906	Sediment	Charcoal	float-ABOX	ABOX			13.89	=	0.34		16785	475	Radiocarbon BP (float-ABOX)											NT	2002	Bird MI, Turney CSM, Fifield LK, Jones R, Ayliffe LK, Palmer A, Cresswell R, Robertson S	Radiocarbon analysis of the early archaeological site of Nauwalabila I, Arnhem Land, Australia: implications for sample suitability and stratigraphic integrity	Quaternary Science Reviews	21:1061-1075		A	Nauwalabila
	-19.783	143.283	Hominidae	Homo	sapiens	ANU-11904	Sediment	Charcoal					14.08	=	0.21		17035	313	Radiocarbon BP											QLD	2004	Wallis LA, Smith D, Smith H	Recent archaeological surveys on Middle Park Station, Northwest Queensland	Australian Archaeology	59:43-50		A	MP102
	-5.93043	150.118	Hominidae	Homo	sapiens	Beta-62318	Sediment	Charcoal					14.31	=	0.1		17367	154	Radiocarbon BP											West New Britain Province	1994	Pavlides C, Gosden C	35,000-year-old sites in the rainforests of West New Britain, Papua New Guinea	Antiquity	68:604-610		A	Eliva Hamlet
	-28.4	139.49	Hominidae	Homo	sapiens	ANU-7196	Fireplace	Charcoal					14.4	=	0.2		17470	270	Radiocarbon BP											SA	1983	Wasson RJ	The Cainozoic history of the Strzelecki and Simpson dunefields (Australia) and the origin of the desert dunes	Zeitschrift fur Geomorphologie NF	45:85-115		A	Simpson-Strzelecki Dunefields Site JSN
	-13.06	132.89	Hominidae	Homo	sapiens	ANUA-9908	Sediment	Charcoal	float-ABOX	ABOX			14.6	=	0.34		17703	430	Radiocarbon BP (float-ABOX)											NT	2002	Bird MI, Turney CSM, Fifield LK, Jones R, Ayliffe LK, Palmer A, Cresswell R, Robertson S	Radiocarbon analysis of the early archaeological site of Nauwalabila I, Arnhem Land, Australia: implications for sample suitability and stratigraphic integrity	Quaternary Science Reviews	21:1061-1075		A	Nauwalabila
	-40.5667	144.75	Hominidae	Homo	sapiens	ANU-1852	Sediment	Charcoal					14.76	=	0.39		17896	473	Radiocarbon BP											TAS	1981	Stockton ED	Radiocarbon Dates for Archaeological Sites in Tasmania	Australian Archaeology	12:97-101		A	Cave Bay Cave
	-38	145.19	Hominidae	Homo	sapiens	KB-4	Sediment	Quartz					18.1	=	1.4		18100	1400	OSL BP											VIC	2010	Hewitt G, Allen J	Site disturbance and archaeological integrity: the case of Bend Road, an open site in Melbourne spanning pre-LGM Pleistocene to late Holocene periods	Australian Archaeology	70:1-16		A	Bend Road
	-23.83	130.86	Hominidae	Homo	sapiens	AdTL-91007	Sediment	Quartz					18.1	=	1.2		18100	1200	TL BP (selective bleach)											NT	1997	Smith MA, Prescott JR, Head MJ	Comparison of 14C and luminescence chronologies at puritjarra rock shelter, central Australia	Quaternary Science Reviews	16:299-320		A	Puritjarra Rockshelter
	-42.44	145.83	Hominidae	Homo	sapiens	Beta-44077	Sediment	Charcoal					14.92	=	0.13		18104	163	Radiocarbon BP											TAS	1996	Stern N & Allen J	Pallawa Trounta shelter	In J. Allen (ed.) Report of the Southern Forests Archaeological Project. Volume 1. Site descriptions, stratigraphies and chronologies. La Trobe University, Melbourne. Pp.169-193.	na		A	Pallawa Trounta
	-32.5	142.6	Hominidae	Homo	sapiens	ANU-2516	na	Shell (freshwater mussel)					15.25	=	0.17		18450	194	Radiocarbon BP											NSW	1990	Balme J, Hope J	Radiocarbon dates from midden sites in the Lower Darling River area of Western New South Wales	Archaeology in Oceania	25:85-101		A	Tandou Creek
	-42.44	145.83	Hominidae	Homo	sapiens	ANU-3983	Sediment	Charcoal					15.39	=	0.38		18624	435	Radiocarbon BP											TAS	1996	Stern N & Allen J	Pallawa Trounta shelter	In J. Allen (ed.) Report of the Southern Forests Archaeological Project. Volume 1. Site descriptions, stratigraphies and chronologies. La Trobe University, Melbourne. Pp.169-193.	na		A	Pallawa Trounta
	-42.44	145.83	Hominidae	Homo	sapiens	ANU-3984	Sediment	Charcoal					15.49	=	0.36		18738	415	Radiocarbon BP											TAS	1996	Stern N & Allen J	Pallawa Trounta shelter	In J. Allen (ed.) Report of the Southern Forests Archaeological Project. Volume 1. Site descriptions, stratigraphies and chronologies. La Trobe University, Melbourne. Pp.169-193.	na		A	Pallawa Trounta
	-34.1	142	Hominidae	Homo	sapiens	Beta-117981	Sediment	Shell					15.77	=	0.09		18988	114	Radiocarbon BP											VIC	1998	Williams E	The Archaeology of Lake Systems in the Middle Cooper Basin, Northeastern South Australia.	Records of the South Australian Museum	22:53-62		A	Merbein
	-24.7225	150.989	Hominidae	Homo	sapiens	Wk-5216	Sediment	Charcoal					15.72	=	0.38		19015	439	Radiocarbon BP											QLD	1998	Lilley I, Brian D, Clarkson C, Ulm S	Pleistocene Aboriginal occupation at Cania Gorge, Central Queensland: Preliminary results of fieldwork	Australian Archaeology	33:28-31		A	Roof Fall Cave
	-38	145.19	Hominidae	Homo	sapiens	KB-20	Sediment	Quartz					19.2	=	1.9		19200	1900	OSL BP											VIC	2010	Hewitt G, Allen J	Site disturbance and archaeological integrity: the case of Bend Road, an open site in Melbourne spanning pre-LGM Pleistocene to late Holocene periods	Australian Archaeology	70:1-16		A	Bend Road
	-42.44	145.83	Hominidae	Homo	sapiens	Beta-44076	Sediment	Charcoal					15.98	=	0.14		19237	181	Radiocarbon BP											TAS	1996	Stern N & Allen J	Pallawa Trounta shelter	In J. Allen (ed.) Report of the Southern Forests Archaeological Project. Volume 1. Site descriptions, stratigraphies and chronologies. La Trobe University, Melbourne. Pp.169-193.	na		A	Pallawa Trounta
	-34.1	142	Hominidae	Homo	sapiens	Beta-117984	Sediment	Shell					16.03	=	0.09		19291	138	Radiocarbon BP											VIC	1998	Williams E	The Archaeology of Lake Systems in the Middle Cooper Basin, Northeastern South Australia.	Records of the South Australian Museum	22:53-62		A	Merbein
	-19.0527	138.698	Hominidae	Homo	sapiens	Wk-12229	Shell	Shell (Alathyria cf pertexta)					16.249	=	0.12		19565	175	Radiocarbon BP											QLD	2004	Slack MJ, Fullagar RLK, Field JH, Border A	New Pleistocene ages for backed artefact technology in Australia. Archaeology in Oceania	Archaeology in Oceania	39:131-137		A	Gregory River
	-42.44	145.83	Hominidae	Homo	sapiens	Beta-44078	Sediment	Charcoal					16.42	=	0.09		19772	130	Radiocarbon BP											TAS	1996	Stern N & Allen J	Pallawa Trounta shelter	In J. Allen (ed.) Report of the Southern Forests Archaeological Project. Volume 1. Site descriptions, stratigraphies and chronologies. La Trobe University, Melbourne. Pp.169-193.	na		A	Pallawa Trounta
	-13.06	132.89	Hominidae	Homo	sapiens	ANUA-9907	Sediment	Charcoal	float-ABOX	ABOX			16.45	=	0.32		19817	394	Radiocarbon BP (float-ABOX)											NT	2002	Bird MI, Turney CSM, Fifield LK, Jones R, Ayliffe LK, Palmer A, Cresswell R, Robertson S	Radiocarbon analysis of the early archaeological site of Nauwalabila I, Arnhem Land, Australia: implications for sample suitability and stratigraphic integrity	Quaternary Science Reviews	21:1061-1075		A	Nauwalabila
	-42.44	145.83	Hominidae	Homo	sapiens	Beta-66283	Sediment	Charcoal					17.11	=	0.15		20591	204	Radiocarbon BP											TAS	1996	Stern N & Allen J	Pallawa Trounta shelter	In J. Allen (ed.) Report of the Southern Forests Archaeological Project. Volume 1. Site descriptions, stratigraphies and chronologies. La Trobe University, Melbourne. Pp.169-193.	na		A	Pallawa Trounta
	-13.06	132.89	Hominidae	Homo	sapiens	ANUA-9514	Sediment	Charcoal	hp-ABOX	ABOX			17.12	=	0.3		20642	392	Radiocarbon BP (hp-ABOX)											NT	2002	Bird MI, Turney CSM, Fifield LK, Jones R, Ayliffe LK, Palmer A, Cresswell R, Robertson S	Radiocarbon analysis of the early archaeological site of Nauwalabila I, Arnhem Land, Australia: implications for sample suitability and stratigraphic integrity	Quaternary Science Reviews	21:1061-1075		A	Nauwalabila
	-38	145.19	Hominidae	Homo	sapiens	KB-14	Sediment	Quartz					20.7	=	1.5		20700	1500	OSL BP											VIC	2010	Hewitt G, Allen J	Site disturbance and archaeological integrity: the case of Bend Road, an open site in Melbourne spanning pre-LGM Pleistocene to late Holocene periods	Australian Archaeology	70:1-16		A	Bend Road
	-32.6	142.2	Hominidae	Homo	sapiens	ANU-2503	na	Shell (freshwater mussel)					17.3	=	0.19		20846	261	Radiocarbon BP											NSW	1990	Balme J, Hope J	Radiocarbon dates from midden sites in the Lower Darling River area of Western New South Wales	Archaeology in Oceania	25:85-101		A	Kangaroo Lake
	-42.61	146.42	Hominidae	Homo	sapiens	R11746 / NZA-513	Fireplace	Charcoal					17.54	=	0.22		21162	302	Radiocarbon BP											TAS	1991	Brown S, Kee S, McGowan A, Middleton G, Nash M, Prince B, Ricketts N, West D	A preliminary survey for Aboriginal sites in the Denison River Valley March 1989	Australian Archaeology	32:26-37		A	Condominium Cliffs Rockshelter
	-42.44	145.83	Hominidae	Homo	sapiens	Beta-44075	Sediment	Charcoal					17.53	=	0.43		21176	539	Radiocarbon BP											TAS	1996	Stern N & Allen J	Pallawa Trounta shelter	In J. Allen (ed.) Report of the Southern Forests Archaeological Project. Volume 1. Site descriptions, stratigraphies and chronologies. La Trobe University, Melbourne. Pp.169-193.	na		A	Pallawa Trounta
	-34.17	142.05	Hominidae	Homo	sapiens	Beta-117983	Sediment	Shell					17.7	=	0.1		21356	174	Radiocarbon BP											VIC	1998	Williams E	The Archaeology of Lake Systems in the Middle Cooper Basin, Northeastern South Australia.	Records of the South Australian Museum	22:53-62		A	Merbein
	-13.1	133.8	Hominidae	Homo	sapiens	Wk-28128	Sediment	Charcoal					17.722	=	0.064		21389	138	AMS radiocarbon BP											NT	2011	David B, Geneste J-M, Whear RL, Delannoy J-J, Katherine M, Gunn R, Clarkson C, Plisson H, Lee P, Petchey F, Rowe C, Barker B, Lamb L, Miller W, Hoerle S, James D, Boche E, Aplin K, McNiven IJ, Richards T, Fairbairn A, Matthews J	Nawarla Gabarnmang, a 45,180 +/- 910 cal BP site in Jawoyn country, Southwest Arnhem land Plateau	Australian Archaeology	73:73-77		A	Nawarla Gabarnmang
	-13.1	133.8	Hominidae	Homo	sapiens	Wk-30468	Sediment	Charcoal					17.833	=	0.077		21550	141	AMS radiocarbon BP											NT	2011	David B, Geneste J-M, Whear RL, Delannoy J-J, Katherine M, Gunn R, Clarkson C, Plisson H, Lee P, Petchey F, Rowe C, Barker B, Lamb L, Miller W, Hoerle S, James D, Boche E, Aplin K, McNiven IJ, Richards T, Fairbairn A, Matthews J	Nawarla Gabarnmang, a 45,180 +/- 910 cal BP site in Jawoyn country, Southwest Arnhem land Plateau	Australian Archaeology	73:73-77		A	Nawarla Gabarnmang
	-13.1	133.8	Hominidae	Homo	sapiens	Wk-30469	Sediment	Charcoal					17.931	=	0.064		21675	115	AMS radiocarbon BP											NT	2011	David B, Geneste J-M, Whear RL, Delannoy J-J, Katherine M, Gunn R, Clarkson C, Plisson H, Lee P, Petchey F, Rowe C, Barker B, Lamb L, Miller W, Hoerle S, James D, Boche E, Aplin K, McNiven IJ, Richards T, Fairbairn A, Matthews J	Nawarla Gabarnmang, a 45,180 +/- 910 cal BP site in Jawoyn country, Southwest Arnhem land Plateau	Australian Archaeology	73:73-77		A	Nawarla Gabarnmang
	-23.12	118.63	Hominidae	Homo	sapiens	Wk-22785	Sediment	Charcoal					17.975	=	0.072		21721	118	AMS radiocarbon BP											WA	2010	Law WB, Croopper DN, Petchey F	Djadjiling Rockshelter: 35,000 14C years of Aboriginal occupation in the Pilbara, Western Australia	Australian Archaeology	70:68-71		A	Djadjiling Rockshelter
	-42.44	145.83	Hominidae	Homo	sapiens	Beta-44079	Sediment	Charcoal					18.06	=	0.17		21831	237	Radiocarbon BP											TAS	1999	Cosgrove R	Forty-two degrees south: the archaeology of Late Pleistocene Tasmania	Journal of World Archaeology	13(4): 357-402		A	Pallawa Trounta
	-13.06	132.89	Hominidae	Homo	sapiens	ANU-9513	Sediment	Charcoal	hp-ABOX	ABOX			18.33	=	0.28		22116	323	Radiocarbon BP (hp-ABOX)											NT	2002	Bird MI, Turney CSM, Fifield LK, Jones R, Ayliffe LK, Palmer A, Cresswell R, Robertson S	Radiocarbon analysis of the early archaeological site of Nauwalabila I, Arnhem Land, Australia: implications for sample suitability and stratigraphic integrity	Quaternary Science Reviews	21:1061-1075		A	Nauwalabila
	-17.2297	144.517	Hominidae	Homo	sapiens	Beta-4323	Shell	Land snails					18.68	=	0.18		22527	212	Radiocarbon BP											QLD	1982	Campbell JB	New radiocarbon results for North Queensland Prehistory	Australian Archaeology	14:62-66		A	Walkunder Arch Cave
	-17.42	124.97	Hominidae	Homo	sapiens	NZA-3801	Sediment	Charcoal					18.94	=	0.17		22788	206	AMS radiocarbon BP											NT	1995	O'Connor S	Carpenter's Gap Rockshelter 1: 40,000 years of aboriginal occupation in the Napier Ranges, Kimberley, WA	Australian Archaeology	40:58-59		A	Carpenter's Gap Shelter
	-40.5667	144.75	Hominidae	Homo	sapiens	ANU-1774	Sediment	Charcoal					19.25	=	0.3		23164	357	Radiocarbon BP											TAS	1981	Stockton ED	Radiocarbon Dates for Archaeological Sites in Tasmania	Australian Archaeology	12:97-101		A	Cave Bay Cave
	-17.2297	144.517	Hominidae	Homo	sapiens	Beta-4325	Shell	Land snails					19.52	=	0.17		23455	233	Radiocarbon BP											QLD	1982	Campbell JB	New radiocarbon results for North Queensland Prehistory	Australian Archaeology	14:62-66		A	Walkunder Arch Cave
	-23.12	118.63	Hominidae	Homo	sapiens	Wk-23310	Sediment	Charcoal					19.757	=	0.083		23743	134	AMS radiocarbon BP											WA	2010	Law WB, Croopper DN, Petchey F	Djadjiling Rockshelter: 35,000 14C years of Aboriginal occupation in the Pilbara, Western Australia	Australian Archaeology	70:68-71		A	Djadjiling Rockshelter
	-23.12	118.63	Hominidae	Homo	sapiens	Wk-23308	Sediment	Charcoal					19.943	=	0.084		23947	133	AMS radiocarbon BP											WA	2010	Law WB, Croopper DN, Petchey F	Djadjiling Rockshelter: 35,000 14C years of Aboriginal occupation in the Pilbara, Western Australia	Australian Archaeology	70:68-71		A	Djadjiling Rockshelter
	-23.12	118.63	Hominidae	Homo	sapiens	Wk-23309	Sediment	Charcoal					19.949	=	0.084		23954	132	AMS radiocarbon BP											WA	2010	Law WB, Croopper DN, Petchey F	Djadjiling Rockshelter: 35,000 14C years of Aboriginal occupation in the Pilbara, Western Australia	Australian Archaeology	70:68-71		A	Djadjiling Rockshelter
	-12.29	132.56	Hominidae	Homo	sapiens	KTL-97	Sediment	Sediment					24	=	4.5		24000	4500	TL BP											NT	1990	Roberts RG, Jones R, Smith MA	Thermoluminescence dating of a 50,000-year-old human occupation site in northern Australia	Nature	345:153-156		A	Malakunanja
	-23.83	130.86	Hominidae	Homo	sapiens	ANUA-10010	Sediment	Charcoal	ABOX-SC	ABOX			20.11	=	0.25		24165	326	AMS Radiocarbon BP (ABOX-SC)											NT	1997	Smith MA, Prescott JR, Head MJ	Comparison of 14C and luminescence chronologies at puritjarra rock shelter, central Australia	Quaternary Science Reviews	16:299-320		A	Puritjarra Rockshelter
	-17.42	124.97	Hominidae	Homo	sapiens	Wk-3076 / NZA-3800	Sediment	Charcoal					20.76	=	0.17		24943	257	AMS radiocarbon BP											NT	1995	O'Connor S	Carpenter's Gap Rockshelter 1: 40,000 years of aboriginal occupation in the Napier Ranges, Kimberley, WA	Australian Archaeology	40:58-59		A	Carpenter's Gap Shelter
	-15.43	129.16	Hominidae	Homo	sapiens	?	Sediment	Sediment - single grain (G1)					6.9	=	0.6		6900	600	OSL BP											NT	1998	Roberts R, Bird M, Olley J, Galbraith R, Lawson E, Laslett G, Yoshida H, Jones R, Fullagar R, Jacobsen G, Hua Q	Optical and radiocarbon dating at Jinmium rock shelter in northern Australia	Nature	393:358-362		A	Jinmium Rockshelter
	-26.09	113.59	Hominidae	Homo	sapiens	ANU-8222	Eggshell	Eggshell (Dromaius sp.)					21.84	=	0.3		26116	318	Radiocarbon BP											WA	2008	Przywolnik K	Long-term transitions in hunter-gatherers of coastal Northwestern Australia	In: Desert Peoples. Blackwell Publishing Ltd	p 177-205		A	Silver Dollar
	-9.07545	147.267	Hominidae	Homo	sapiens	Wk-23359	Wood	Charcoal					22.302	=	0.108		26503	195	AMS radiocarbon BP											Central province	2010	Summerhayes GR, Leavesley M, Fairbairn A, Mandui H, Field J, Ford A, Fullagar R	Human adaptation and plant use in Highland New Guinea 49,000 to 44,000 years ago	Science	330:78-81		A	Joe's Garden AAXC
	-42.44	145.83	Hominidae	Homo	sapiens	Beta-62284	Sediment	Charcoal					22.24	=	0.53		26543	509	Radiocarbon BP											TAS	1999	Cosgrove R	Forty-two degrees south: the archaeology of Late Pleistocene Tasmania	Journal of World Archaeology	13(4): 357-402		A	Pallawa Trounta
	-23.83	130.86	Hominidae	Homo	sapiens	AdTL-91008	Sediment	Quartz					26.7	=	1.4		26700	1400	TL BP (selective bleach)											NT	1997	Smith MA, Prescott JR, Head MJ	Comparison of 14C and luminescence chronologies at puritjarra rock shelter, central Australia	Quaternary Science Reviews	16:299-320		A	Puritjarra Rockshelter
	-26.09	113.59	Hominidae	Homo	sapiens	ANU-8220	Eggshell	Eggshell (Dromaius sp.)					22.54	=	0.57		26783	527	Radiocarbon BP											WA	2008	Przywolnik K	Long-term transitions in hunter-gatherers of coastal Northwestern Australia	In: Desert Peoples. Blackwell Publishing Ltd	p 177-205		A	Silver Dollar
	-42.49	145.94	Hominidae	Homo	sapiens	Beta-42995	Sediment	Charcoal					22.65	=	0.2		26904	251	Radiocarbon BP											TAS	1996a	Allen J	Warreen cave	In J. Allen (ed.) Report of the Southern Forests Archaeological Project. Volume 1. Site descriptions, stratigraphies and chronologies. La Trobe University, Melbourne. Pp. 135-167	Report		A	Warreen Cave
	-9.08447	147.255	Hominidae	Homo	sapiens	Wk-27069	Wood	Charcoal					22.802	=	0.141		27086	196	AMS radiocarbon BP											Central province	2010	Summerhayes GR, Leavesley M, Fairbairn A, Mandui H, Field J, Ford A, Fullagar R	Human adaptation and plant use in Highland New Guinea 49,000 to 44,000 years ago	Science	330:78-81		A	Vilakuav
	-17.3087	126.606	Hominidae	Homo	sapiens	Mud nest LWRS2	Wasp nests	Quartz grains					27.1	=	1.5		27100	1500	OSL BP											WA	2003	Yoshida H, Roberts RG, Olley JM	Progress towards single-grain optical dating of fossil mud-wasp nests and associated rock art in northern Australia	Quaternary Science Reviews	22:1273-1278		A	Several sites (unnamed)
	-9.08045	147.259	Hominidae	Homo	sapiens	Wk-27077	Wood	Charcoal					22.998	=	0.125		27290	132	AMS radiocarbon BP											Central province	2010	Summerhayes GR, Leavesley M, Fairbairn A, Mandui H, Field J, Ford A, Fullagar R	Human adaptation and plant use in Highland New Guinea 49,000 to 44,000 years ago	Science	330:78-81		A	South Kov
	-15.43	129.16	Hominidae	Homo	sapiens	?	Sediment	Sediment - single grain (G1)					9	=	0.8		9000	800	OSL BP											NT	1998	Roberts R, Bird M, Olley J, Galbraith R, Lawson E, Laslett G, Yoshida H, Jones R, Fullagar R, Jacobsen G, Hua Q	Optical and radiocarbon dating at Jinmium rock shelter in northern Australia	Nature	393:358-362		A	Jinmium Rockshelter
	-15.43	129.16	Hominidae	Homo	sapiens	?	Sediment	Sediment - single aliquot (S)					11.1	=	0.8		11100	800	OSL BP											NT	1998	Roberts R, Bird M, Olley J, Galbraith R, Lawson E, Laslett G, Yoshida H, Jones R, Fullagar R, Jacobsen G, Hua Q	Optical and radiocarbon dating at Jinmium rock shelter in northern Australia	Nature	393:358-362		A	Jinmium Rockshelter
	-16.8082	144.822	Hominidae	Homo	sapiens	ANUA-23608	Sediment	Charcoal					23.19	=	0.35		27374	321	AMS radiocarbon BP											QLD	2007	David B, Roberts RG, Magee J, Mialanes J, Turney C, Bird M, White C, Fifield LK, Tibby J	Sediment mixing at Nonda Rock: investigations of stratigraphic integrity at an early archaeological site in northern Australia and implications for the human colonisation of the continent	Journal of Quaternary Science	22:449-479		A	Nonda Rock Rockshelter
	-38	145.19	Hominidae	Homo	sapiens	KB-13	Sediment	Quartz					27.4	=	2.4		27400	2400	OSL BP											VIC	2010	Hewitt G, Allen J	Site disturbance and archaeological integrity: the case of Bend Road, an open site in Melbourne spanning pre-LGM Pleistocene to late Holocene periods	Australian Archaeology	70:1-16		A	Bend Road
	-35.23	142.85	Hominidae	Homo	sapiens	Wk-168	Sediment	Charcoal					24.061	=	0.144		28074	176	AMS radiocarbon BP											VIC	2007	Richards T, Pavlides C, Walshe K, Webber H, Johnston R	Box Gully: new evidence for Aboriginal occupation of Australia south of the Murray River prior to the last glacial maximum	Archaeology in Oceania	42:1-11		A	Box Gully
	-38	145.19	Hominidae	Homo	sapiens	KB-12	Sediment	Quartz					28.2	=	2.2		28200	2200	OSL BP											VIC	2010	Hewitt G, Allen J	Site disturbance and archaeological integrity: the case of Bend Road, an open site in Melbourne spanning pre-LGM Pleistocene to late Holocene periods	Australian Archaeology	70:1-16		A	Bend Road
	-35.23	142.85	Hominidae	Homo	sapiens	Wk-169	Sediment	Charcoal					24.372	=	0.15		28360	189	AMS radiocarbon BP											VIC	2007	Richards T, Pavlides C, Walshe K, Webber H, Johnston R	Box Gully: new evidence for Aboriginal occupation of Australia south of the Murray River prior to the last glacial maximum	Archaeology in Oceania	42:1-11		A	Box Gully
	-9.08045	147.259	Hominidae	Homo	sapiens	Wk-27076	Wood	Charcoal					24.433	=	0.149		28421	184	AMS radiocarbon BP											Central province	2010	Summerhayes GR, Leavesley M, Fairbairn A, Mandui H, Field J, Ford A, Fullagar R	Human adaptation and plant use in Highland New Guinea 49,000 to 44,000 years ago	Science	330:78-81		A	South Kov
	-9.08045	147.259	Hominidae	Homo	sapiens	Wk-27080	Wood	Charcoal					24.856	=	0.153		28862	186	AMS radiocarbon BP											Central province	2010	Summerhayes GR, Leavesley M, Fairbairn A, Mandui H, Field J, Ford A, Fullagar R	Human adaptation and plant use in Highland New Guinea 49,000 to 44,000 years ago	Science	330:78-81		A	South Kov
	-8.35	147.267	Hominidae	Homo	sapiens	Wk-17898	Wood	Charcoal					25.217	=	0.293		29277	362	AMS radiocarbon BP											Central province	2010	Summerhayes GR, Leavesley M, Fairbairn A, Mandui H, Field J, Ford A, Fullagar R	Human adaptation and plant use in Highland New Guinea 49,000 to 44,000 years ago	Science	330:78-81		A	Kosipe
	-16.8082	144.822	Hominidae	Homo	sapiens	ANUA-15502	Sediment	Charcoal					25.3	=	0.195		29319	258	AMS radiocarbon BP											QLD	2007	David B, Roberts RG, Magee J, Mialanes J, Turney C, Bird M, White C, Fifield LK, Tibby J	Sediment mixing at Nonda Rock: investigations of stratigraphic integrity at an early archaeological site in northern Australia and implications for the human colonisation of the continent	Journal of Quaternary Science	22:449-479		A	Nonda Rock Rockshelter
	-16.8082	144.822	Hominidae	Homo	sapiens	ANUA-23617	Sediment	Charcoal					25.21	=	0.4		29327	485	AMS radiocarbon BP											QLD	2007	David B, Roberts RG, Magee J, Mialanes J, Turney C, Bird M, White C, Fifield LK, Tibby J	Sediment mixing at Nonda Rock: investigations of stratigraphic integrity at an early archaeological site in northern Australia and implications for the human colonisation of the continent	Journal of Quaternary Science	22:449-479		A	Nonda Rock Rockshelter
	-23.12	118.63	Hominidae	Homo	sapiens	Wk-23311	Sediment	Charcoal					25.519	=	0.154		29601	246	AMS radiocarbon BP											WA	2010	Law WB, Croopper DN, Petchey F	Djadjiling Rockshelter: 35,000 14C years of Aboriginal occupation in the Pilbara, Western Australia	Australian Archaeology	70:68-71		A	Djadjiling Rockshelter
	-42.44	145.83	Hominidae	Homo	sapiens	Beta-44080	Sediment	Charcoal					25.51	=	0.45		29670	528	Radiocarbon BP											TAS	1996	Stern N & Allen J	Pallawa Trounta shelter	In J. Allen (ed.) Report of the Southern Forests Archaeological Project. Volume 1. Site descriptions, stratigraphies and chronologies. La Trobe University, Melbourne. Pp.169-193.	na		A	Pallawa Trounta
	-13.06	132.89	Hominidae	Homo	sapiens	Ox(OD)K166	Sediment	Sediment					30	=	2.4		30000	2400	OSL BP											NT	1993	Roberts RG, Jones R, Smith MA	Optical dating at Deaf Adder Gorge, Northern Territory, indicates human occupation between 53,000 and 60,000 years ago	Australian Archaeology	37:58-59		A	Nauwalabila
	-42.49	145.94	Hominidae	Homo	sapiens	Beta-42065	Sediment	Charcoal					26.71	=	0.21		30867	154	Radiocarbon BP											TAS	1996a	Allen J	Warreen cave	In J. Allen (ed.) Report of the Southern Forests Archaeological Project. Volume 1. Site descriptions, stratigraphies and chronologies. La Trobe University, Melbourne. Pp. 135-167	Report		A	Warreen Cave
	-42.49	145.94	Hominidae	Homo	sapiens	Beta-46782	Sediment	Charcoal					27.16	=	0.25		31118	155	Radiocarbon BP											TAS	2012	Gillespie R, AB Camens, TH Worthy, NJ Rawlence, C Reid, F Bertuch, V Levchenko, A Cooper	Man and megafauna in Tasmania: closing the gap	Quaternary Science Reviews	37:38-47		A	Warreen Cave
	-42.49	145.94	Hominidae	Homo	sapiens	Beta-42997	Sediment	Charcoal					26.83	=	1.24		31170	1382	Radiocarbon BP											TAS	1996a	Allen J	Warreen cave	In J. Allen (ed.) Report of the Southern Forests Archaeological Project. Volume 1. Site descriptions, stratigraphies and chronologies. La Trobe University, Melbourne. Pp. 135-167	Report		A	Warreen Cave
	-42.44	145.83	Hominidae	Homo	sapiens	Beta-62285	Sediment	Charcoal					27.25	=	0.53		31346	538	Radiocarbon BP											TAS	2012	Gillespie R, AB Camens, TH Worthy, NJ Rawlence, C Reid, F Bertuch, V Levchenko, A Cooper	Man and megafauna in Tasmania: closing the gap	Quaternary Science Reviews	37:38-47		A	Pallawa Trounta
	-35.23	142.85	Hominidae	Homo	sapiens	Wk-170	Sediment	Charcoal					27.656	=	0.202		31415	188	AMS radiocarbon BP											VIC	2007	Richards T, Pavlides C, Walshe K, Webber H, Johnston R	Box Gully: new evidence for Aboriginal occupation of Australia south of the Murray River prior to the last glacial maximum	Archaeology in Oceania	42:1-11		A	Box Gully
	-12.27	132.57	Hominidae	Homo	sapiens	KTL-126	Sediment	Quartz (80-115 microns)					32	=	9		32000	9000	TL BP											NT	1990	Roberts RG, Jones R, Smith MA	Thermoluminescence dating of a 50,000-year-old human occupation site in northern Australia	Nature	345:153-156		A	Malangangerr Rockshelter
	-3.9355	152.654	Hominidae	Homo	sapiens	Beta-37568	Sediment	Shell					28.32	=	0.66		32098	695	Radiocarbon BP											New Ireland Province	1998	Leavesley M & Allen J	Dates, Disturbance and Artefact Distributions: Another Analysis of Buang Merabak, a Pleistocene Site on New Ireland, Papua New Guinea	Archaeology in Oceania	33(2):63-82		A	Matenkupkum
	-19.0527	138.698	Hominidae	Homo	sapiens	Beta-184341	Sediment	Alathyria cf pertexta					28.36	=	0.34		32276	479	Radiocarbon BP											QLD	2004	Slack MJ, Fullagar RLK, Field JH, Border A	New Pleistocene ages for backed artefact technology in Australia. Archaeology in Oceania	Archaeology in Oceania	39:131-137		A	Gregory River
	-19.2	143.2	Hominidae	Homo	sapiens	Wk-24199	Sediment	Charcoal					28.419	=	0.32		32331	468	Radiocarbon BP											QLD	2009	Wallis LA, Keys B, Moffat I, Fallon S	Gledswood Shelter 1: Initial radiocarbon dates from a Pleistocene aged rockshelter site in Northwest Queensland	Australian Archaeology	69:71-74		A	Gledswood Shelter
	-23.83	130.86	Hominidae	Homo	sapiens	ANUA-10009	Sediment	Charcoal	ABOX-SC	ABOX			28.54	=	0.35		32477	505	AMS Radiocarbon BP (ABOX-SC)											NT	2001	Smith, M. A. Bird, M. I. Turney, C. S. M. Fifield, L. K. Santos, G. M. Hausladen, P. A. di Tada, M. L.	New ABOX AMS- 14C ages remove dating anomalies at Puritjarra Rockshelter	Australian Archaeology	53: 45-47		A	Puritjarra Rockshelter
	-18.74	126	Hominidae	Homo	sapiens	Wk-7896	Sediment	Charcoal					29.55	=	0.29		33667	281	Radiocarbon BP											WA	2000	Balme J	Excavations revealing 40,000 years of occupation at Mimbi Caves, South Central Kimberley, Western Australia	Australian Archaeology	51:1-15		A	Riwi Rockshelter
	-42.44	145.83	Hominidae	Homo	sapiens	Beta-44081	Sediment	Charcoal					29.8	=	0.72		33847	762	Radiocarbon BP											TAS	2012	Gillespie R, AB Camens, TH Worthy, NJ Rawlence, C Reid, F Bertuch, V Levchenko, A Cooper	Man and megafauna in Tasmania: closing the gap	Quaternary Science Reviews	37:38-47		A	Pallawa Trounta
	-42.49	145.94	Hominidae	Homo	sapiens	Beta-42059	Sediment	Charcoal					30.21	=	0.3		34233	256	Radiocarbon BP											TAS	1996	Allen J	Report of the Southern Forests Archaeological Project: Site descriptions, stratigraphies and chronologies	Archaeology Publications, School of Archaeology, La Trobe University	na		A	Warreen Cave
	-8.35	147.267	Hominidae	Homo	sapiens	Wk-17261	Wood	Charcoal					30.575	=	0.399		34535	360	AMS radiocarbon BP											Central province	2010	Summerhayes GR, Leavesley M, Fairbairn A, Mandui H, Field J, Ford A, Fullagar R	Human adaptation and plant use in Highland New Guinea 49,000 to 44,000 years ago	Science	330:78-81		A	Kosipe
	-13.1	133.8	Hominidae	Homo	sapiens	Wk-28616	Sediment	Charcoal					30.615	=	0.309		34537	284	AMS radiocarbon BP											NT	2011	David B, Geneste J-M, Whear RL, Delannoy J-J, Katherine M, Gunn R, Clarkson C, Plisson H, Lee P, Petchey F, Rowe C, Barker B, Lamb L, Miller W, Hoerle S, James D, Boche E, Aplin K, McNiven IJ, Richards T, Fairbairn A, Matthews J	Nawarla Gabarnmang, a 45,180 +/- 910 cal BP site in Jawoyn country, Southwest Arnhem land Plateau	Australian Archaeology	73:73-77		A	Nawarla Gabarnmang
	-23.83	130.86	Hominidae	Homo	sapiens	AdTL-91009	Sediment	Quartz					34.6	=	1.6		34600	1600	TL BP (selective bleach)											NT	1997	Smith MA, Prescott JR, Head MJ	Comparison of 14C and luminescence chronologies at puritjarra rock shelter, central Australia	Quaternary Science Reviews	16:299-320		A	Puritjarra Rockshelter
	-13.1	133.8	Hominidae	Homo	sapiens	Wk-28621	Sediment	Charcoal					30.761	=	0.314		34668	305	AMS radiocarbon BP											NT	2011	David B, Geneste J-M, Whear RL, Delannoy J-J, Katherine M, Gunn R, Clarkson C, Plisson H, Lee P, Petchey F, Rowe C, Barker B, Lamb L, Miller W, Hoerle S, James D, Boche E, Aplin K, McNiven IJ, Richards T, Fairbairn A, Matthews J	Nawarla Gabarnmang, a 45,180 +/- 910 cal BP site in Jawoyn country, Southwest Arnhem land Plateau	Australian Archaeology	73:73-77		A	Nawarla Gabarnmang
	-16.7936	144.762	Hominidae	Homo	sapiens	ANU(od)122a-M	Sediment	Quartz					34.9	=	2.1		34900	2100	OSL BP											QLD	1997	David B, Roberts R, Tuniz. C, Jones R, Head J	New optical and radiocarbon dates from Ngarrabullgan Cave, a Pleistocene archaeological site in Australia: implications for the comparability of time clocks and for the human colonization of Australia	Antiquity	71:183-188		A	Nurrabullgin (Initiation) Cave
	-13.1	133.8	Hominidae	Homo	sapiens	Wk-28131	Sediment	Charcoal					31.063	=	0.595		35063	591	AMS radiocarbon BP											NT	2011	David B, Geneste J-M, Whear RL, Delannoy J-J, Katherine M, Gunn R, Clarkson C, Plisson H, Lee P, Petchey F, Rowe C, Barker B, Lamb L, Miller W, Hoerle S, James D, Boche E, Aplin K, McNiven IJ, Richards T, Fairbairn A, Matthews J	Nawarla Gabarnmang, a 45,180 +/- 910 cal BP site in Jawoyn country, Southwest Arnhem land Plateau	Australian Archaeology	73:73-77		A	Nawarla Gabarnmang
	-23.83	130.86	Hominidae	Homo	sapiens	ANUA-10013	Sediment	Charcoal	ABOX-SC	ABOX			31.14	=	0.47		35086	467	AMS Radiocarbon BP (ABOX-SC)											NT	1997	Smith MA, Prescott JR, Head MJ	Comparison of 14C and luminescence chronologies at puritjarra rock shelter, central Australia	Quaternary Science Reviews	16:299-320		A	Puritjarra Rockshelter
	-38	145.19	Hominidae	Homo	sapiens	KB-8	Sediment	Quartz					35.3	=	2.6		35300	2600	OSL BP											VIC	2010	Hewitt G, Allen J	Site disturbance and archaeological integrity: the case of Bend Road, an open site in Melbourne spanning pre-LGM Pleistocene to late Holocene periods	Australian Archaeology	70:1-16		A	Bend Road
	-13.1	133.8	Hominidae	Homo	sapiens	Wk-28130	Sediment	Charcoal					31.316	=	0.618		35314	643	AMS radiocarbon BP											NT	2011	David B, Geneste J-M, Whear RL, Delannoy J-J, Katherine M, Gunn R, Clarkson C, Plisson H, Lee P, Petchey F, Rowe C, Barker B, Lamb L, Miller W, Hoerle S, James D, Boche E, Aplin K, McNiven IJ, Richards T, Fairbairn A, Matthews J	Nawarla Gabarnmang, a 45,180 +/- 910 cal BP site in Jawoyn country, Southwest Arnhem land Plateau	Australian Archaeology	73:73-77		A	Nawarla Gabarnmang
	-42.49	145.94	Hominidae	Homo	sapiens	Beta-46783	Sediment	Charcoal					31.61	=	0.37		35483	386	Radiocarbon BP											TAS	2012	Gillespie R, AB Camens, TH Worthy, NJ Rawlence, C Reid, F Bertuch, V Levchenko, A Cooper	Man and megafauna in Tasmania: closing the gap	Quaternary Science Reviews	37:38-47		A	Warreen Cave
	-30.3486	147.343	Hominidae	Homo	sapiens	ANUA-10319	Sediment	Charcoal	ABOX-SC	ABOX			32	=	0.55		35982	678	AMS radiocarbon BP (ABOX-SC)											NSW	2001	Fitfield LK, Bird MI, Turney CSM, Hausladen PA, Santos GM, Di Tada ML	Radiocarbon dating of the human occupation of Australia prior to 40 ka BP - successes and pitfalls	Radiocarbon	43:1139-1145		A	Cuddie Springs
	-9.08447	147.255	Hominidae	Homo	sapiens	Wk-27071	Wood	Charcoal					32.588	=	0.392		36652	568	AMS radiocarbon BP											Central province	2010	Summerhayes GR, Leavesley M, Fairbairn A, Mandui H, Field J, Ford A, Fullagar R	Human adaptation and plant use in Highland New Guinea 49,000 to 44,000 years ago	Science	330:78-81		A	Vilakuav
	-5.91043	150.118	Hominidae	Homo	sapiens	Beta-47046	Sediment	Charcoal					32.63	=	0.4		36717	581	Radiocarbon BP											West New Britain Province	1994	Pavlides C, Gosden C	35,000-year-old sites in the rainforests of West New Britain, Papua New Guinea	Antiquity	68:604-610		A	Yombon
	-29.0306	138.894	Hominidae	Homo	sapiens	K-2006	Sediment	Quartz					37.2	=	5.8		37200	5800	OSL BP											WA	2012	Veth P, Smith M, Bowler J, Fitzsimmons K, Williams A, Hiscock P (2009) Excavations at Parnkupirti, Lake Gregory, Great Sandy Desert: OSL ages for occupation before the last glacial maximum	Excavations at Parnkupirti, Lake Gregory, Great Sandy Desert: OSL ages for occupation before the last glacial maximum	Australian Archaeology	69:1-10		A	Parnkupirti
	-42.49	145.94	Hominidae	Homo	sapiens	ANUA-11710	Sediment	Charcoal	ABOX	ABOX			33.17	=	0.67		37406	827	AMS? Radiocarbon BP (ABOX)											TAS	2012	Gillespie R, AB Camens, TH Worthy, NJ Rawlence, C Reid, F Bertuch, V Levchenko, A Cooper	Man and megafauna in Tasmania: closing the gap	Quaternary Science Reviews	37:38-47		A	Warreen Cave
	-17.42	124.97	Hominidae	Homo	sapiens	ANUA-8130	Sediment	Charcoal	ABOX-SC	ABOX			33.2	=	0.6		37418	753	AMS radiocarbon BP (ABOX-SC)											NT	2001	Fitfield LK, Bird MI, Turney CSM, Hausladen PA, Santos GM, Di Tada ML	Radiocarbon dating of the human occupation of Australia prior to 40 ka BP - successes and pitfalls	Radiocarbon	43:1139-1145		A	Carpenter's Gap Shelter
	-5.91043	150.118	Hominidae	Homo	sapiens	Beta-62323	Sediment	Charcoal					33.6	=	0.67		37848	848	Radiocarbon BP											West New Britain Province	1994	Pavlides C, Gosden C	35,000-year-old sites in the rainforests of West New Britain, Papua New Guinea	Antiquity	68:604-610		A	Yombon
	-33.8	143.1	Hominidae	Homo	sapiens	F-8B	Fireplace	Quartz					37.9	=	6.4		37900	6400	TL BP											NSW	1977	Huxtable J, Aitken MU	Thermoluminescent dating of Lake Mungo geomagnetic polarity excursion	Nature	265:40-41		A	Lake Mungo
	-15.43	129.16	Hominidae	Homo	sapiens	?	Sediment	Sediment - single aliquot (S)					11.3	=	0.7		11300	700	OSL BP											NT	1998	Roberts R, Bird M, Olley J, Galbraith R, Lawson E, Laslett G, Yoshida H, Jones R, Fullagar R, Jacobsen G, Hua Q	Optical and radiocarbon dating at Jinmium rock shelter in northern Australia	Nature	393:358-362		A	Jinmium Rockshelter
	-15.43	129.16	Hominidae	Homo	sapiens	?	Sediment	Sediment - single aliquot (S)					21.2	=	1.3		21200	1300	OSL BP											NT	1998	Roberts R, Bird M, Olley J, Galbraith R, Lawson E, Laslett G, Yoshida H, Jones R, Fullagar R, Jacobsen G, Hua Q	Optical and radiocarbon dating at Jinmium rock shelter in northern Australia	Nature	393:358-362		A	Jinmium Rockshelter
	-16.8034	144.816	Hominidae	Homo	sapiens	ANUA-9315/ANUA-9316/ANUA-8807	Sediment	Charcoal	ABOX	ABOX			34.44	=	0.44		38969	507	AMS Radiocarbon BP (ABOX)(mean)											QLD	1999	Bird MI, Ayliffe LK, Fifield LK, R. C, Turney CSM, Barrows TT, David B	Radiocarbon dating of √¶old√Ü charcoal using a wet oxidation-stepped combustion procedure	. Radiocarbon	41:127-140		A	Ngarrabullgan Cave
	-8.35	147.267	Hominidae	Homo	sapiens	Wk-17900	Wood	Charcoal					34.531	=	0.626		39064	750	AMS radiocarbon BP											Central province	2010	Summerhayes GR, Leavesley M, Fairbairn A, Mandui H, Field J, Ford A, Fullagar R	Human adaptation and plant use in Highland New Guinea 49,000 to 44,000 years ago	Science	330:78-81		A	Kosipe
	-3.9355	152.654	Hominidae	Homo	sapiens	ANU-8179	Sediment	Shell					35.41	=	0.43		39577	492	Radiocarbon BP											New Ireland Province	1998	Leavesley M & Allen J	Dates, Disturbance and Artefact Distributions: Another Analysis of Buang Merabak, a Pleistocene Site on New Ireland, Papua New Guinea	Archaeology in Oceania	33(2):63-82		A	Matenkupkum
	-31.48	129.42	Hominidae	Homo	sapiens	Ox(OD)AC390	Sediment	Quartz					39.8	=	3.1		39600	3100	OSL BP											WA	1996	Roberts RG, Spooner NA, Jones R, Cane S, Olley JM, Murray AS, Head MJ	Preliminary luminescence dates for archaeological sediments on the Nullarbor Plain, South Australia	Australian Archaeology	42:7-16		A	Allen's Cave
	-8.35	147.267	Hominidae	Homo	sapiens	Wk-17901	Wood	Charcoal					35.049	=	0.67		39643	732	AMS radiocarbon BP											Central province	2010	Summerhayes GR, Leavesley M, Fairbairn A, Mandui H, Field J, Ford A, Fullagar R	Human adaptation and plant use in Highland New Guinea 49,000 to 44,000 years ago	Science	330:78-81		A	Kosipe
	-31.7702	116.036	Hominidae	Homo	sapiens	SUA-1704	Sediment	Carbonised nodules					35.1	=	1.5		39702	1627	Radiocarbon BP											WA	1981	Pearce RH, Barbetti M	A 38,000-year-old archaeological site at Upper Swan, Western Australia	Archaeology in Oceania	16:173-178		A	2nd oldest Guildford level (Upper Swan)
	-23.12	118.63	Hominidae	Homo	sapiens	Wk-22787	Sediment	Charcoal					35.159	=	0.537		39724	600	AMS radiocarbon BP											WA	2010	Law WB, Croopper DN, Petchey F	Djadjiling Rockshelter: 35,000 14C years of Aboriginal occupation in the Pilbara, Western Australia	Australian Archaeology	70:68-71		A	Djadjiling Rockshelter
	-34.3457	115.141	Hominidae	Homo	sapiens	Wk-8919	Sediment	Shell					35.23	=	0.45		39776	523	Radiocarbon BP											WA	2012	O'Connell JF, Allen J	The restaraurant at the end of the universe: Modelling the colonisation of Sahul	Australian Archaeology	74:5-31		A	Jansz
	-16.8034	144.816	Hominidae	Homo	sapiens	ANUA-8807	Sediment	Charcoal					35.2	=	0.72		39802	772	AMS radiocarbon BP											QLD	1999	Bird MI, Ayliffe LK, Fifield LK, R. C, Turney CSM, Barrows TT, David B	Radiocarbon dating of √¶old√Ü charcoal using a wet oxidation-stepped combustion procedure	. Radiocarbon	41:127-140		A	Ngarrabullgan Cave
	-34.15	115.07	Hominidae	Homo	sapiens	SUA-586	Sediment	Charcoal					35.16	=	1.8		39871	2013	Radiocarbon BP											WA	1979	Dortch CE	33,000 year old stone and bone artifacts from Devil√Üs Lair, Western Australia	Records of the Western Australian Museum	7:329-367		A	Devils Lair
	-23.12	118.63	Hominidae	Homo	sapiens	Wk-23312	Sediment	Charcoal					35.396	=	0.518		39969	587	AMS radiocarbon BP											WA	2010	Law WB, Croopper DN, Petchey F	Djadjiling Rockshelter: 35,000 14C years of Aboriginal occupation in the Pilbara, Western Australia	Australian Archaeology	70:68-71		A	Djadjiling Rockshelter
	-23.12	118.63	Hominidae	Homo	sapiens	Wk-23313	Sediment	Charcoal					35.753	=	0.546		40344	590	AMS radiocarbon BP											WA	2010	Law WB, Croopper DN, Petchey F	Djadjiling Rockshelter: 35,000 14C years of Aboriginal occupation in the Pilbara, Western Australia	Australian Archaeology	70:68-71		A	Djadjiling Rockshelter
	-32.4667	137.7	Hominidae	Homo	sapiens	GNS NZA-34976	Fireplace	Charcoal					40.5	=	0.95		40500	950	OSL BP											SA	2012	Walshe KE	Port Augusta hearth site dated to 40,000 years	Australian Archaeology	74:106-110		A	Cooper's Dune
	-32.4	142.5	Hominidae	Homo	sapiens	ANU-3509	na	Shell (freshwater mussel)					36	=	1.1		40553	1039	Radiocarbon BP											NSW	1990	Balme J, Hope J	Radiocarbon dates from midden sites in the Lower Darling River area of Western New South Wales	Archaeology in Oceania	25:85-101		A	Lake Tandou
	-34.3457	115.141	Hominidae	Homo	sapiens	Wk-33656	Sediment	Charcoal					36.039	=	0.272		40647	326	Radiocarbon BP											WA	2013	Smith M	The Archaeology of Australia's Deserts	Cambridge University Press	Book		A	CBIO-93 Rockshelter
	-16.7936	144.762	Hominidae	Homo	sapiens	Beta-47849	Sediment	Charcoal					36.1	=	0.8		40648	764	Radiocarbon BP											QLD	1997	David B, Roberts R, Tuniz. C, Jones R, Head J	New optical and radiocarbon dates from Ngarrabullgan Cave, a Pleistocene archaeological site in Australia: implications for the comparability of time clocks and for the human colonization of Australia	Antiquity	71:183-188		A	Nurrabullgin (Initiation) Cave
	-33.7	143	Hominidae	Homo	sapiens	CAMS-2038	Sediment	Shell					36.17	=	1.11		40704	1033	AMS radiocarbon BP											NSW	2012	Bowler JM, Gillespie R, H. J, Bolkjovac K	Wind v Water: Glacial Maximum records from the Willandra Lakes. In: Haberle SG, David B (eds) Peopled landmegafaunascapes: Archaeological and biogeographic approaches to landscapes	ANU E-Press, Canberra, ACT, Australia	271-296		A	Outer Arumpo Lake
	-8.34	147.28	Hominidae	Homo	sapiens	Wk-23355	Wood	Charcoal					36.264	=	0.575		40824	558	AMS radiocarbon BP											Central province	2010	Summerhayes GR, Leavesley M, Fairbairn A, Mandui H, Field J, Ford A, Fullagar R	Human adaptation and plant use in Highland New Guinea 49,000 to 44,000 years ago	Science	330:78-81		A	Airport Mound
	-33.8	143.1	Hominidae	Homo	sapiens	W-1799	Sediment	Quartz					41.4	=	6.7		41400	6700	TL BP											NSW	1998	Bowler JM, Price DM	Luminescence dates and stratigraphie analyses at Lake Mungo: review and new perspectives	Archaeology in Oceania	33:156-168		A	Lake Mungo
	-31.7702	116.036	Hominidae	Homo	sapiens	SUA-1665	Sediment	Carbonised nodules					37.1	=	1.6		41704	1590	Radiocarbon BP											WA	1981	Pearce RH, Barbetti M	A 38,000-year-old archaeological site at Upper Swan, Western Australia	Archaeology in Oceania	16:173-178		A	2nd oldest Guildford level (Upper Swan)
	-13.1	133.8	Hominidae	Homo	sapiens	Wk-29206	Sediment	Charcoal					37.842	=	0.917		42155	736	AMS radiocarbon BP											NT	2011	David B, Geneste J-M, Whear RL, Delannoy J-J, Katherine M, Gunn R, Clarkson C, Plisson H, Lee P, Petchey F, Rowe C, Barker B, Lamb L, Miller W, Hoerle S, James D, Boche E, Aplin K, McNiven IJ, Richards T, Fairbairn A, Matthews J	Nawarla Gabarnmang, a 45,180 +/- 910 cal BP site in Jawoyn country, Southwest Arnhem land Plateau	Australian Archaeology	73:73-77		A	Nawarla Gabarnmang
	-32.4667	137.7	Hominidae	Homo	sapiens	AA-94759	Fireplace	Charcoal					38.3	=	0		42389	110	Radiocarbon BP											SA	2012	Walshe KE	Port Augusta hearth site dated to 40,000 years	Australian Archaeology	74:106-110		A	Cooper's Dune
	-19.0527	138.698	Hominidae	Homo	sapiens	Wk-11429	Shell	Shell (Alathyria cf pertexta)					37.11	=	2.945		42431	3072	Radiocarbon BP											QLD	2004	Slack MJ, Fullagar RLK, Field JH, Border A	New Pleistocene ages for backed artefact technology in Australia. Archaeology in Oceania	Archaeology in Oceania	39:131-137		A	Gregory River
	-3.21041	151.844	Hominidae	Homo	sapiens	ANUA-11556-6	Shell (unaltered)	Opercula (Turbo sp.)					38.76	=	0.1		42450	125	AMS radiocarbon BP											New Ireland Province	2004	Leavesley MG, Chappell J	Buang Merabak: Additional early evidence of the colonisation of the Bismarck Archipelago, Papua New Guinea	Antiquity	ProjGall/301.htnit. 78:http://www.antiquity.ac.uk/projgall/leavesley/		A	Buang Meraback Cave
	-34.15	115.07	Hominidae	Homo	sapiens	SUA-698	Sediment	Charcoal					37.75	=	2.5		42870	2609	Radiocarbon BP											WA	1979	Dortch CE	33,000 year old stone and bone artifacts from Devil√Üs Lair, Western Australia	Records of the Western Australian Museum	7:329-367		A	Devils Lair
	-3.21041	151.844	Hominidae	Homo	sapiens	ANUA-15808	Shell	Turbo argyrostoma (80%)					39.59	=	0.56		43096	456	AMS radiocarbon BP											New Ireland Province	2002	Leavesley MG, Bird MI, Fifield LK, Hausladen PA, Santos GM, Di Tada ML	Buang Merabak: early evidence for human occupation in the Bismarck Archipelago, Papua New Guinea	Australian Archaeology	54:55-57		A	Buang Meraback Cave
	-32.3	142.3	Hominidae	Homo	sapiens	LM-10	Sediment	Quartz					43.1	=	3.7		43100	3700	OSL BP											NSW	2006	Cupper ML, Duncan J	Last glacial megafaunal death assemblage and early human occupation at Lake Menindee, southeastern Australia	Quaternary Research	66:332-341		A	Lake Menindee
	-31.7702	116.036	Hominidae	Homo	sapiens	SUA-1500	Sediment	Charcoal					39.5	=	0.23		43169	218	Radiocarbon BP											WA	1981	Pearce RH, Barbetti M	A 38,000-year-old archaeological site at Upper Swan, Western Australia	Archaeology in Oceania	16:173-178		A	2nd oldest Guildford level (Upper Swan)
	-17.42	124.97	Hominidae	Homo	sapiens	NZA-3803	Sediment	Charcoal					39.22	=	0.87		43230	712	AMS radiocarbon BP											NT	1995	O'Connor S	Carpenter's Gap Rockshelter 1: 40,000 years of aboriginal occupation in the Napier Ranges, Kimberley, WA	Australian Archaeology	40:58-59		A	Carpenter's Gap Shelter
	-15.43	129.16	Hominidae	Homo	sapiens	?	Sediment	Sediment - single aliquot (S)					22.7	=	1.2		22700	1200	OSL BP											NT	1998	Roberts R, Bird M, Olley J, Galbraith R, Lawson E, Laslett G, Yoshida H, Jones R, Fullagar R, Jacobsen G, Hua Q	Optical and radiocarbon dating at Jinmium rock shelter in northern Australia	Nature	393:358-362		A	Jinmium Rockshelter
	-17.42	124.97	Hominidae	Homo	sapiens	NZA-3802	Sediment	Charcoal					39.7	=	1		43644	840	AMS radiocarbon BP											NT	1995	O'Connor S	Carpenter's Gap Rockshelter 1: 40,000 years of aboriginal occupation in the Napier Ranges, Kimberley, WA	Australian Archaeology	40:58-59		A	Carpenter's Gap Shelter
	-8.34	147.28	Hominidae	Homo	sapiens	Wk-23356	Wood	Charcoal					39.836	=	0.909		43699	762	AMS radiocarbon BP											Central province	2010	Summerhayes GR, Leavesley M, Fairbairn A, Mandui H, Field J, Ford A, Fullagar R	Human adaptation and plant use in Highland New Guinea 49,000 to 44,000 years ago	Science	330:78-81		A	Airport Mound
	-41.7	146.08	Hominidae	Homo	sapiens	Beta-68160/CAMS-10272	Sediment	Charcoal					39.97	=	0.95		43814	804	Radiocarbon BP											TAS	1995	Cosgrove R	Late Pleistocene behavioural variation and time trends: the case from Tasmania	30:83-104	Archaeology in Oceania		A	Parmerpar Meethaner Shelter
	-35.23	142.85	Hominidae	Homo	sapiens	Wk-171	Sediment	Charcoal					40.384	=	0.766		44038	665	AMS radiocarbon BP											VIC	2007	Richards T, Pavlides C, Walshe K, Webber H, Johnston R	Box Gully: new evidence for Aboriginal occupation of Australia south of the Murray River prior to the last glacial maximum	Archaeology in Oceania	42:1-11		A	Box Gully
	-13.1	133.8	Hominidae	Homo	sapiens	Wk-32040	Sediment	Charcoal					40.228	=	1.043		44049	910	AMS radiocarbon BP											NT	2013	David B, Barker B, Petchey F, Delannoy J-J, Geneste J-M, Rowe C, Eccleston M, Lamb L, Whear R	A 28,000 year old excavated painted rock from Nawarla Gabarnmang, northern Australia	Journal of Archaeological Science	40:2493-2501		A	Nawarla Gabarnmang
	-9.08045	147.259	Hominidae	Homo	sapiens	Wk-23354	Wood	Charcoal					40.298	=	0.956		44055	827	AMS radiocarbon BP											Central province	2010	Summerhayes GR, Leavesley M, Fairbairn A, Mandui H, Field J, Ford A, Fullagar R	Human adaptation and plant use in Highland New Guinea 49,000 to 44,000 years ago	Science	330:78-81		A	South Kov
	-12.29	132.56	Hominidae	Homo	sapiens	KTL-164	Sediment	Quartz					44.2	=	4.7		44200	4700	OSL BP											NT	1998	Roberts R, Yoshida H, Galbraith R, Laslett GM, Jones R, Smith M	Single-aliquot and single-grain optical dating confirm thermoluminescence age estimates at Malakunanja II rock shelter in northern Australia	Ancient TL	16:19-24		A*	Malakunanja
	-17.42	124.97	Hominidae	Homo	sapiens	ANUA-7616	Sediment	Charcoal	ABOX-SC	ABOX			40.6	=	0.8		44214	704	AMS radiocarbon BP (ABOX-SC)											NT	2001	Fitfield LK, Bird MI, Turney CSM, Hausladen PA, Santos GM, Di Tada ML	Radiocarbon dating of the human occupation of Australia prior to 40 ka BP - successes and pitfalls	Radiocarbon	43:1139-1145		A	Carpenter's Gap Shelter
	-33.8	143.1	Hominidae	Homo	sapiens	?	Sediment	Quartz					40.9	=	4.5		40900	4500	OSL BP											NSW	2006	Olleya JM, Roberts, Richard G., Yoshida H, Bowler JM	Single-grain optical dating of grave-infill associated with human burials at Lake Mungo, Australia	Quaternary Science Reviews	25: 2469-2474		A*	Lake Mungo
	-18.74	126	Hominidae	Homo	sapiens	ANUA-13006	Sediment	Charcoal (isolate)					40.7	=	1.26		44556	1198	AMS radiocarbon BP											WA	2000	Balme J	Excavations revealing 40,000 years of occupation at Mimbi Caves, South Central Kimberley, Western Australia	Australian Archaeology	51:1-15		A	Riwi Rockshelter
	-23.83	130.86	Hominidae	Homo	sapiens	AdTL-91010	Sediment	Quartz					44.8	=	3.6		44800	3600	TL BP (selective bleach)											NT	1997	Smith MA, Prescott JR, Head MJ	Comparison of 14C and luminescence chronologies at puritjarra rock shelter, central Australia	Quaternary Science Reviews	16:299-320		A	Puritjarra Rockshelter
	-18.74	126	Hominidae	Homo	sapiens	ANUA-13005	Fireplace	Charcoal					41.3	=	1.02		44900	984	AMS radiocarbon BP											WA	2001	Fitfield LK, Bird MI, Turney CSM, Hausladen PA, Santos GM, Di Tada ML	Radiocarbon dating of the human occupation of Australia prior to 40 ka BP - successes and pitfalls	Radiocarbon	43:1139-1145		A*	Riwi Rockshelter
	-9.08447	147.255	Hominidae	Homo	sapiens	Wk-2704	Wood	Charcoal					41.206	=	1.173		44915	1151	AMS radiocarbon BP											Central province	2010	Summerhayes GR, Leavesley M, Fairbairn A, Mandui H, Field J, Ford A, Fullagar R	Human adaptation and plant use in Highland New Guinea 49,000 to 44,000 years ago	Science	330:78-81		A	Vilakuav
	-13.1	133.8	Hominidae	Homo	sapiens	Wk-29207	Sediment	Charcoal					41.149	=	1.426		45052	1417	AMS radiocarbon BP											NT	2011	David B, Geneste J-M, Whear RL, Delannoy J-J, Katherine M, Gunn R, Clarkson C, Plisson H, Lee P, Petchey F, Rowe C, Barker B, Lamb L, Miller W, Hoerle S, James D, Boche E, Aplin K, McNiven IJ, Richards T, Fairbairn A, Matthews J	Nawarla Gabarnmang, a 45,180 +/- 910 cal BP site in Jawoyn country, Southwest Arnhem land Plateau	Australian Archaeology	73:73-77		A	Nawarla Gabarnmang
	-33.8	143.1	Hominidae	Homo	sapiens	?	Fireplace	Quartz					32.3	=	5.8		32300	5800	TL BP											NSW	1977	Huxtable J, Aitken MU	Thermoluminescent dating of Lake Mungo geomagnetic polarity excursion	Nature	265:40-41		A	Lake Mungo
	-13.1	133.8	Hominidae	Homo	sapiens	Wk-29205	Sediment	Charcoal					41.68	=	1.532		45575	1528	AMS radiocarbon BP											NT	2011	David B, Geneste J-M, Whear RL, Delannoy J-J, Katherine M, Gunn R, Clarkson C, Plisson H, Lee P, Petchey F, Rowe C, Barker B, Lamb L, Miller W, Hoerle S, James D, Boche E, Aplin K, McNiven IJ, Richards T, Fairbairn A, Matthews J	Nawarla Gabarnmang, a 45,180 +/- 910 cal BP site in Jawoyn country, Southwest Arnhem land Plateau	Australian Archaeology	73:73-77		A	Nawarla Gabarnmang
	-33.8	143.1	Hominidae	Homo	sapiens	?	Fireplace	Quartz					32.7	=	2.3		32700	2300	TL BP											NSW	1977	Huxtable J, Aitken MU	Thermoluminescent dating of Lake Mungo geomagnetic polarity excursion	Nature	265:40-41		A	Lake Mungo
	-33.8	143.1	Hominidae	Homo	sapiens	?	Fireplace	Quartz					33.3	=	2.3		33300	2300	TL BP											NSW	1977	Huxtable J, Aitken MU	Thermoluminescent dating of Lake Mungo geomagnetic polarity excursion	Nature	265:40-41		A	Lake Mungo
	-13.1	133.8	Hominidae	Homo	sapiens	Wk-32126	Sediment	Charcoal					42.872	=	1.45		46582	1407	AMS radiocarbon BP											NT	2013	David B, Barker B, Petchey F, Delannoy J-J, Geneste J-M, Rowe C, Eccleston M, Lamb L, Whear R	A 28,000 year old excavated painted rock from Nawarla Gabarnmang, northern Australia	Journal of Archaeological Science	40:2493-2501		A	Nawarla Gabarnmang
	-33.8	143.1	Hominidae	Homo	sapiens	?	Fireplace	Quartz					35.3	=	5.6		35300	5600	TL BP											NSW	1977	Huxtable J, Aitken MU	Thermoluminescent dating of Lake Mungo geomagnetic polarity excursion	Nature	265:40-41		A	Lake Mungo
	-34.15	115.07	Hominidae	Homo	sapiens	ANUA-11512	Sediment	Charcoal	ABOX-SC	ABOX			46.73	=	2.19		47892	2818	AMS Radiocarbon BP (ABOX-SC)											WA	2001	Turney CSM, Bird MI, Fifield LK, Roberts RG, Smith M, Dortch CE, Gr√ºn R, Lawson E, Ayliffe LK, Miller GH, Dortch J, Cresswell RG	Early human occupation at Devil's Lair, Southwestern Australia 50,000 years ago	Quaternary Research	55(1):3-13		A	Devils Lair
	-33.8	143.1	Hominidae	Homo	sapiens	?	Fireplace	Quartz					36.8	=	2.6		36800	2600	TL BP											NSW	1977	Huxtable J, Aitken MU	Thermoluminescent dating of Lake Mungo geomagnetic polarity excursion	Nature	265:40-41		A	Lake Mungo
	-33.8	143.1	Hominidae	Homo	sapiens	?	Fireplace	Quartz					38.6	=	7.7		38600	7700	TL BP											NSW	1977	Huxtable J, Aitken MU	Thermoluminescent dating of Lake Mungo geomagnetic polarity excursion	Nature	265:40-41		A	Lake Mungo
	-33.8	143.1	Hominidae	Homo	sapiens	ST 1.95 m (Spit 13)	Sediment	Quartz					49.1	=	2.7		49100	2700	OSL BP											NSW	2003	Bowler JM, Johnston H, Olley JM, Prescott JR, Roberts RG, Shawcross W, Spooner NA	New ages for human occupation and climatic change at Lake Mungo, Australia	Nature	421: 837-840		A	Lake Mungo
	-34.15	115.07	Hominidae	Homo	sapiens	ANUA-11502	Sediment	Charcoal	ABOX-SC	ABOX			43.6	=	1		47083	1055	AMS radiocarbon BP (ABOX-SC)											WA	2001	Fitfield LK, Bird MI, Turney CSM, Hausladen PA, Santos GM, Di Tada ML	Radiocarbon dating of the human occupation of Australia prior to 40 ka BP - successes and pitfalls	Radiocarbon	43:1139-1145		A	Devils Lair
	-33.8	143.1	Hominidae	Homo	sapiens	ST 1.60 m (Spit 9)	Sediment	Quartz					50.1	=	2.4		50100	2400	OSL BP											NSW	2003	Bowler JM, Johnston H, Olley JM, Prescott JR, Roberts RG, Shawcross W, Spooner NA	New ages for human occupation and climatic change at Lake Mungo, Australia	Nature	421: 837-840		A	Lake Mungo
	-12.29	132.56	Hominidae	Homo	sapiens	KTL-158	Sediment	Sediment					52	=	9		52000	9000	TL BP											NT	1990	Roberts RG, Jones R, Smith MA	Thermoluminescence dating of a 50,000-year-old human occupation site in northern Australia	Nature	345:153-156		A	Malakunanja
	-13.06	132.89	Hominidae	Homo	sapiens	Ox(OD)K168	Sediment	Sediment					53.4	=	5.4		53400	5400	OSL BP											NT	1993	Roberts RG, Jones R, Smith MA	Optical dating at Deaf Adder Gorge, Northern Territory, indicates human occupation between 53,000 and 60,000 years ago	Australian Archaeology	37:58-59		A	Nauwalabila
	-12.29	132.56	Hominidae	Homo	sapiens	KTL-162	Sediment	Quartz					55.5	=	8.2		55500	8200	OSL BP											NT	1998	Roberts R, Yoshida H, Galbraith R, Laslett GM, Jones R, Smith M	Single-aliquot and single-grain optical dating confirm thermoluminescence age estimates at Malakunanja II rock shelter in northern Australia	Ancient TL	16:19-24		A*	Malakunanja
	-34.15	115.07	Hominidae	Homo	sapiens	ANUA-11502	Sediment	Charcoal	ABOX-SC	ABOX			45.47	=	1.42		48371	1020	AMS Radiocarbon BP (ABOX-SC)											WA	2001	Turney CSM, Bird MI, Fifield LK, Roberts RG, Smith M, Dortch CE, Gr√ºn R, Lawson E, Ayliffe LK, Miller GH, Dortch J, Cresswell RG	Early human occupation at Devil's Lair, Southwestern Australia 50,000 years ago	Quaternary Research	55(1):3-13		A	Devils Lair
	-34.15	115.07	Hominidae	Homo	sapiens	ANUA-11511	Sediment	Charcoal	ABOX-SC	ABOX			45.5	=	1.5		48348	1041	AMS radiocarbon BP (ABOX-SC)											WA	2001	Fitfield LK, Bird MI, Turney CSM, Hausladen PA, Santos GM, Di Tada ML	Radiocarbon dating of the human occupation of Australia prior to 40 ka BP - successes and pitfalls	Radiocarbon	43:1139-1145		A	Devils Lair
	-34.15	115.07	Hominidae	Homo	sapiens	ANUA-11511	Sediment	Charcoal					48.13	=	2.275		49408	2985	Radiocarbon BP											WA	2001	Turney CSM, Bird MI, Fifield LK, Roberts RG, Smith M, Dortch CE, Gr√ºn R, Lawson E, Ayliffe LK, Miller GH, Dortch J, Cresswell RG	Early human occupation at Devil's Lair, Southwestern Australia 50,000 years ago	Quaternary Research	55(1):3-13		A	Devils Lair
	-34.15	115.07	Hominidae	Homo	sapiens	ANUA-11709	Sediment	Charcoal	ABOX-SC	ABOX			41.46	=	1.4		45301	1410	AMS Radiocarbon BP (ABOX-SC)											WA	2001	Turney CSM, Bird MI, Fifield LK, Roberts RG, Smith M, Dortch CE, Gr√ºn R, Lawson E, Ayliffe LK, Miller GH, Dortch J, Cresswell RG	Early human occupation at Devil's Lair, Southwestern Australia 50,000 years ago	Quaternary Research	55(1):3-13		A	Devils Lair
	-34.15	115.07	Hominidae	Homo	sapiens	DL-4	Sediment	Quartz					25.5	=	1.4		25500	1400	OSL BP											WA	2001	Turney CSM, Bird MI, Fifield LK, Roberts RG, Smith M, Dortch CE, Gr√ºn R, Lawson E, Ayliffe LK, Miller GH, Dortch J, Cresswell RG	Early human occupation at Devil's Lair, Southwestern Australia 50,000 years ago	Quaternary Research	55(1):3-13		A	Devils Lair
	-34.15	115.07	Hominidae	Homo	sapiens	DL-7	Sediment	Quartz					44.4	=	2.1		44400	2100	OSL BP											WA	2001	Turney CSM, Bird MI, Fifield LK, Roberts RG, Smith M, Dortch CE, Gr√ºn R, Lawson E, Ayliffe LK, Miller GH, Dortch J, Cresswell RG	Early human occupation at Devil's Lair, Southwestern Australia 50,000 years ago	Quaternary Research	55(1):3-13		A	Devils Lair
	-34.15	115.07	Hominidae	Homo	sapiens	DL-8	Sediment	Quartz					43.4	=	2.2		43400	2200	OSL BP											WA	2001	Turney CSM, Bird MI, Fifield LK, Roberts RG, Smith M, Dortch CE, Gr√ºn R, Lawson E, Ayliffe LK, Miller GH, Dortch J, Cresswell RG	Early human occupation at Devil's Lair, Southwestern Australia 50,000 years ago	Quaternary Research	55(1):3-13		A	Devils Lair
	-35.63	144.13	Hominidae	Homo	sapiens	Not given	Bone	Bone					5.4	=	0.09		6131	104	Radiocarbon BP											NSW	1995	Pardoe C	Riverine, biological and cultural evolution in southeastern Australia.(Special Issue)(Transitions: Pleistocene to Holocene in Australia & Papua New Guinea)	Antiquity	69:696-713		A	Barham
	-35.23	142.85	Hominidae	Homo	sapiens	Not given	Sediment	Sediment					27.31	=	1.52		27310	1520	OSL BP											VIC	2007	Richards T, Pavlides C, Walshe K, Webber H, Johnston R	Box Gully: new evidence for Aboriginal occupation of Australia south of the Murray River prior to the last glacial maximum	Archaeology in Oceania	42:1-11		A	Box Gully
	-15.43	129.16	Hominidae	Homo	sapiens	W-1755	Sediment	Artefact					2.9	=	0.4		2900	400	TL BP											NT	1996	Fullagar RLK, Price DM, Head LM	Early human occupation of northern Australia: archaeology and thermoluminescence dating of Jinmium rock-shelter, Northern Territory	Antiquity	70:751-773		A	Jinmium Rockshelter
	-15.43	129.16	Hominidae	Homo	sapiens	W-1755	Sediment	Artefact					3.2	=	0.4		3200	400	TL BP											NT	1996	Fullagar RLK, Price DM, Head LM	Early human occupation of northern Australia: archaeology and thermoluminescence dating of Jinmium rock-shelter, Northern Territory	Antiquity	70:751-773		A	Jinmium Rockshelter
	-9.07545	147.267	Hominidae	Homo	sapiens	Wk-27072	Wood	Charcoal					33.7	=	0.416		37939	583	AMS radiocarbon BP											Central province	2010	Summerhayes GR, Leavesley M, Fairbairn A, Mandui H, Field J, Ford A, Fullagar R	Human adaptation and plant use in Highland New Guinea 49,000 to 44,000 years ago	Science	330:78-81		A	Vilakuav
	-9.08447	147.255	Hominidae	Homo	sapiens	Wk-27072	Wood	Charcoal					41.951	=	1.571		45827	1551	AMS radiocarbon BP											Central province	2010	Summerhayes GR, Leavesley M, Fairbairn A, Mandui H, Field J, Ford A, Fullagar R	Human adaptation and plant use in Highland New Guinea 49,000 to 44,000 years ago	Science	330:78-81		A	Vilakuav
